# Supplementary material for: Disclosing the mechanism and origin of stereoselectivity of the NHC-catalyzed transformation reaction of enals with acyl azolium as a key intermediate
Source: Royal Society of Chemistry journal article supplement (doi:10.1039/d4cy00470a), 2024-01-01
Supplement: d4cy00470a1.pdf [file d4cy00470a1.pdf]

Electronic Supplementary Information For

**Disclosing the Mechanism and Origin of Stereoselectivity of NHC-Catalyzed  
Transformation Reaction of Enal with Acyl Azolium as Key Intermediate**

Pingxin Liang, Dongying Shi, Yang Wang\*

**Content**

|                                                                                                 |     |
|-------------------------------------------------------------------------------------------------|-----|
| Part 1: Energy profile for the Re-face addition .....                                           | S2  |
| Part 2: Illustration of stereochemistry .....                                                   | S3  |
| Part 3: Possible pathways for decarboxylation process .....                                     | S4  |
| Part 4: Energy profile for the reaction between acyl azolium intermediate Si-M3 and R2-anion .. | S5  |
| Part 5: Different configuration of complex Si-M4.....                                           | S6  |
| Part 6: NCI and AIM analysis for TS4RR and TS4SS.....                                           | S7  |
| Part 7: Base effect on the proton transfer process.....                                         | S8  |
| Part 8: Hydrogen bond effect on the C-C bond formation .....                                    | S9  |
| Part 9: Solvation effect on the C-C bond formation step .....                                   | S10 |
| Part 10: Energies and Cartesian coordinates of all the stationary points.....                   | S11 |

---

\*Corresponding Author: Wang Yang ([wangyang@zzuli.edu.cn](mailto:wangyang@zzuli.edu.cn), [2017017@email.zzuli.edu.cn](mailto:2017017@email.zzuli.edu.cn))

## Part 1: Energy profile for the *Re*-face addition

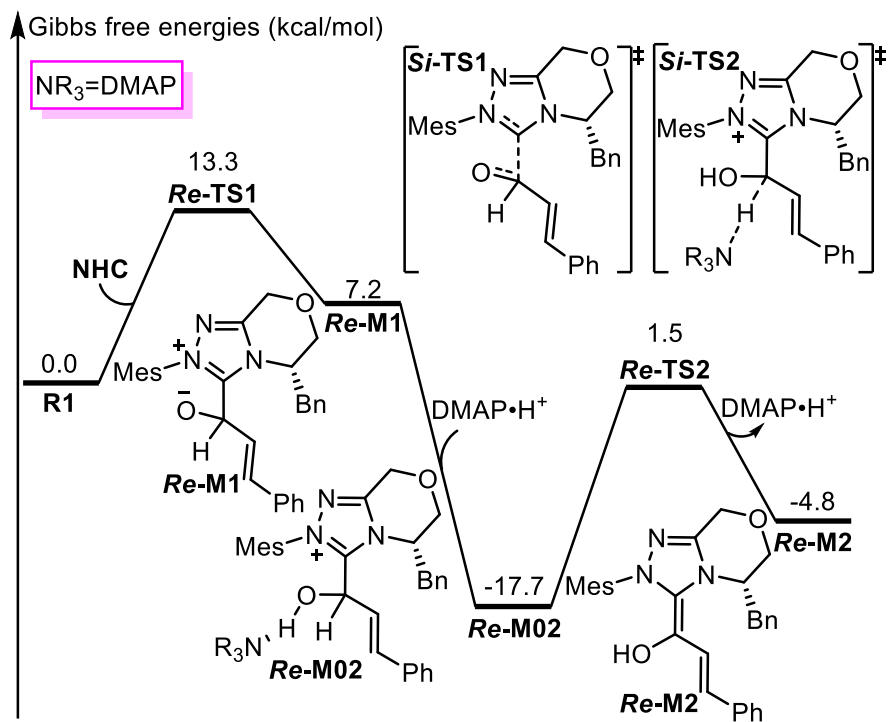

Fig. S1 Energy profile for the formation of *Re*-M2.

## Part 2: Illustration of stereochemistry

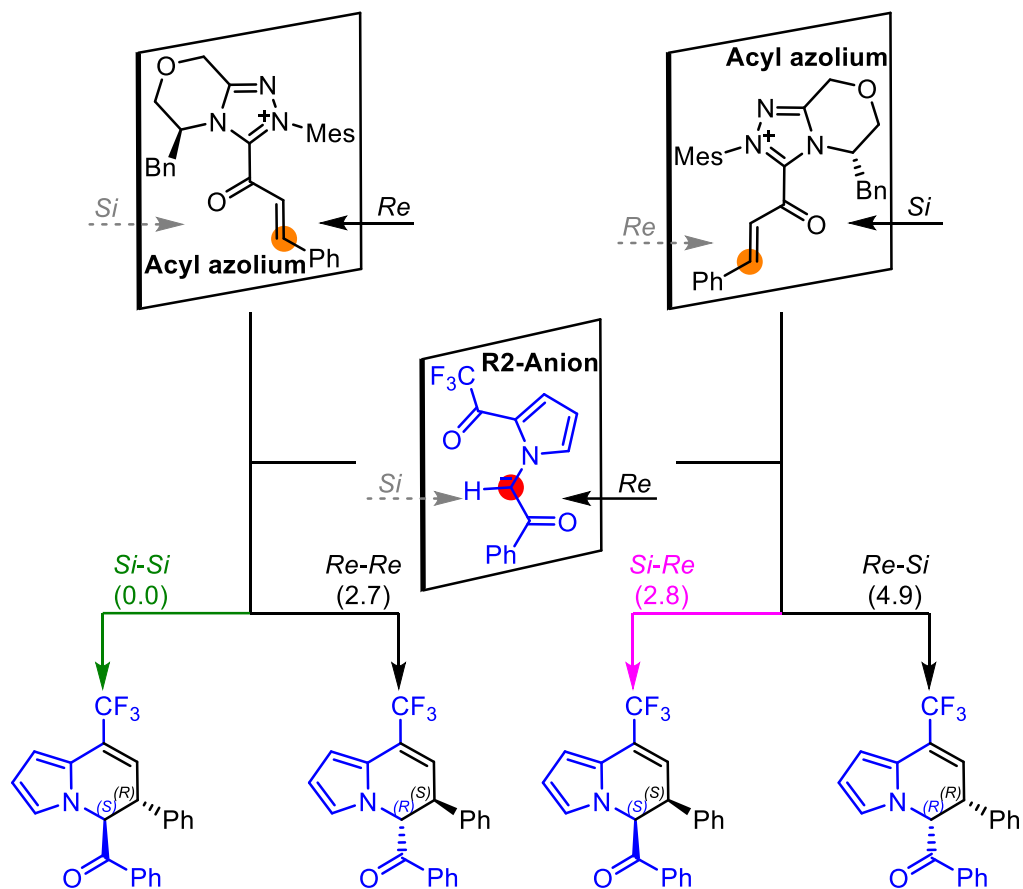

Scheme S1 Illustration of the stereoselective addition mode.

### Part 3: Possible pathways for decarboxylation process

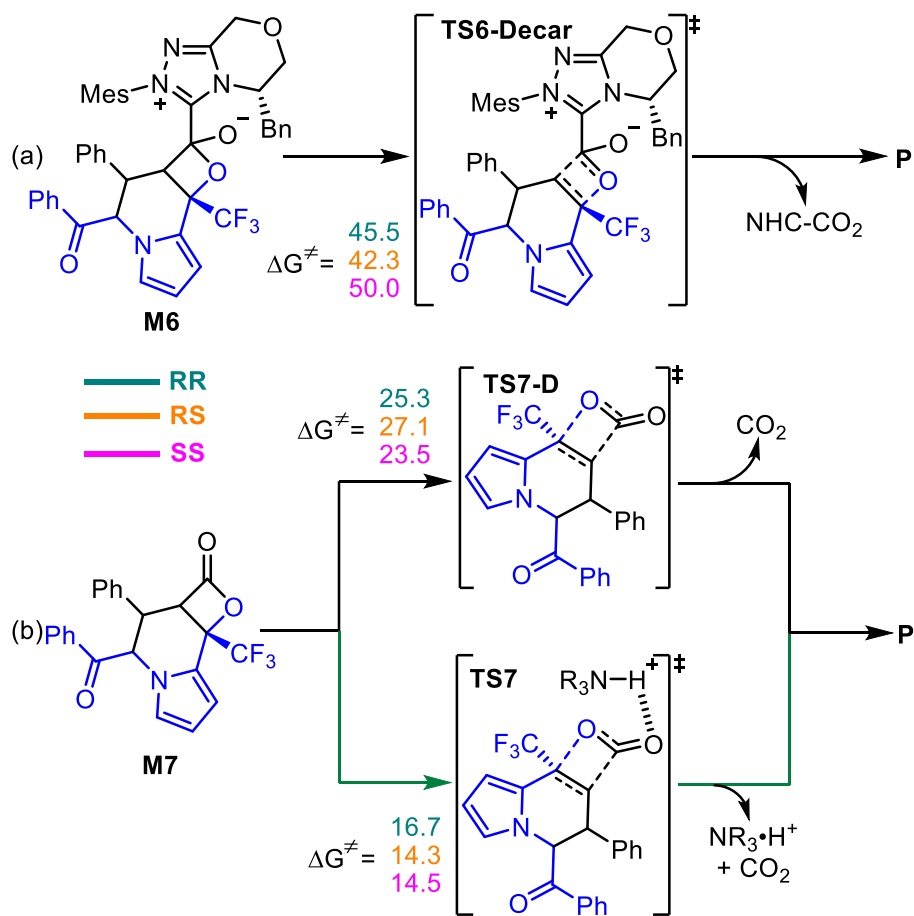

**Scheme S2** Possible Pathways for Decarboxylation Process.

## Part 4: Energy profile for the reaction between acyl azolium intermediate Si-M3 and R2-anion

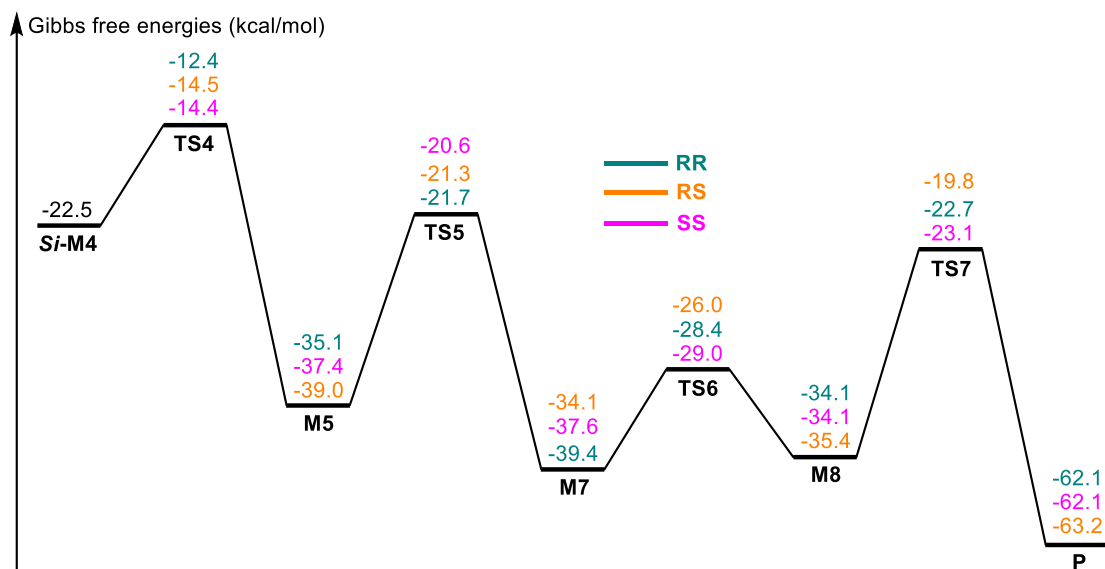

Fig. S2 Energy profile for the reaction between acyl azolium intermediate Si-M3 and R2-anion.

## Part 5: Different configuration of complex Si-M4

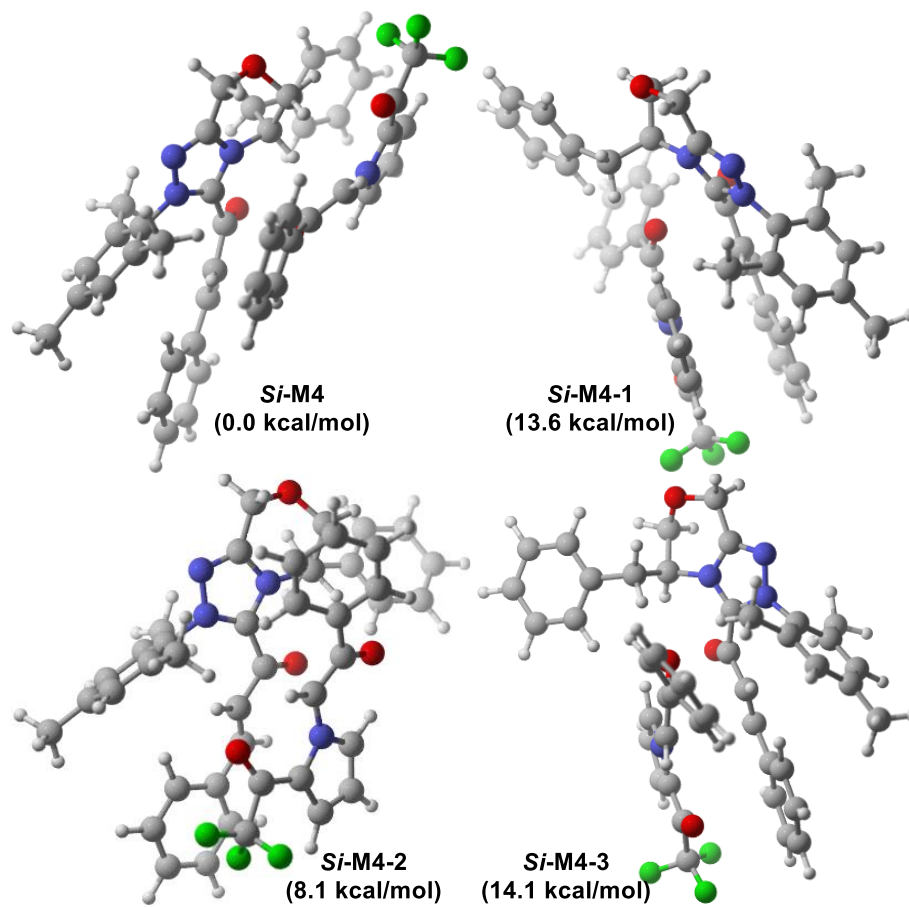

Fig. S3 Different configurations of the complex *Si-M4*.

## Part 6: NCI and AIM analysis for TS4RR and TS4SS

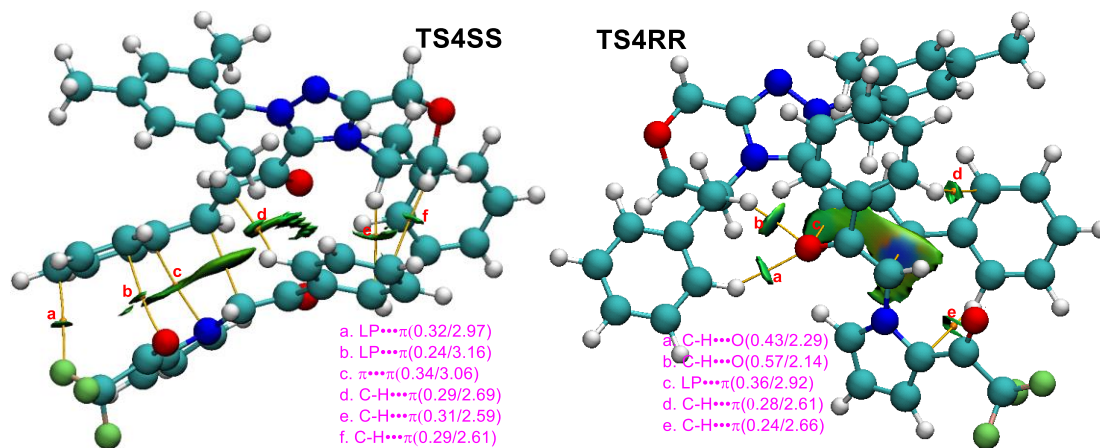

**Fig. S4** NCI and AIM analyses for the enantioselective transition states of **TS4SS** and **TS4RR** (distance in Å and Laplacian of electron density  $\nabla^2\rho$  in  $10^{-1}$  a.u.).

## Part 7: Base effect on the proton transfer process

Table S1. Energy barriers for Brønsted acid promoted proton transfer

|                      | H-Bond Abstractor |       |       |
|----------------------|-------------------|-------|-------|
|                      | DMAP              | DBU   | DIPEA |
| <b>R1+NHC</b>        | 0.0               | 0.0   | 0.0   |
| <b><i>Si</i>-M02</b> | -15.4             | -12.0 | -15.3 |
| <b><i>Si</i>-TS2</b> | -0.7              | 3.2   | -2.6  |



## Part 8: Hydrogen bond effect on the C-C bond formation

Table S2. Energy barriers for DMAP•H<sup>+</sup> participated the C-C bond formation step

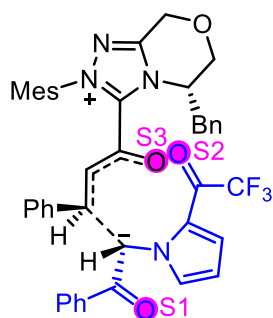

|    | S0  | S1  | S2  | S3  |
|----|-----|-----|-----|-----|
| RR | 4.9 | 2.9 | 3.2 | 3.8 |
| RS | 2.7 | 3.0 | 3.9 | 3.3 |
| SR | 0.0 | 0.0 | 0.0 | 0.0 |
| SS | 2.8 | 1.6 | 4.0 | 1.8 |

## Part 9: Solvation effect on the C-C bond formation step

**Table S3.** Solvent effects on the C-C bond formation step

|    | Toluene | Gas phase | THF |
|----|---------|-----------|-----|
| RR | 4.9     | 2.1       | 3.4 |
| RS | 2.7     | 1.7       | 1.6 |
| SR | 0.0     | 0.0       | 0.0 |
| SS | 2.8     | 1.5       | 1.3 |

## Part 10: Energies and Cartesian coordinates of all the stationary points

### 1. Energies of all the stationary points

|                           | G (a.u.)     | G-correct (a.u.) | Imaginary frequency (cm <sup>-1</sup> ) |
|---------------------------|--------------|------------------|-----------------------------------------|
| <b>R1</b>                 | -422.6862870 | 0.11003          | -                                       |
| <b>R2</b>                 | -1043.675010 | 0.172791         | -                                       |
| <b>R2-Anion</b>           | -1043.164808 | 0.160186         | -                                       |
| <b>NHC</b>                | -1052.757028 | 0.353287         | -                                       |
| <b>DQ</b>                 | -1240.434406 | 0.560574         | -                                       |
| <b>DQ•H</b>               | -1241.147138 | 0.574546         | -                                       |
| <b>DMAP</b>               | -381.9684470 | 0.129384         | -                                       |
| <b>DMAP•H<sup>+</sup></b> | -382.3898570 | 0.145535         | -                                       |
| <b>CO<sub>2</sub></b>     | -188.5171010 | -0.006883        | -                                       |
| <b>Re-TS1</b>             | -1475.424292 | 0.490192         | -170.13                                 |
| <b>Re-M1</b>              | -1475.434155 | 0.489975         | -                                       |
| <b>Re-M02</b>             | -1857.873499 | 0.65837          | -                                       |
| <b>Re-TS2</b>             | -1857.831559 | 0.655358         | -772.06                                 |
| <b>Re-M2</b>              | -1475.451377 | 0.487002         | -                                       |
| <b>Si-TS1</b>             | -1475.424367 | 0.491929         | -175.20                                 |
| <b>Si-M1</b>              | -1475.433316 | 0.493197         | -                                       |
| <b>Si-M02</b>             | -1857.870435 | 0.655231         | -                                       |
| <b>Si-TS2</b>             | -1857.834384 | 0.65347          | -941.86                                 |
| <b>Si-M2</b>              | -1475.455900 | 0.487491         | -                                       |
| <b>Si-TS3</b>             | -2715.876541 | 1.079498         | -1227.96                                |
| <b>Si-M3</b>              | -2715.883194 | 1.083967         | -                                       |
| <b>Si-M4</b>              | -2517.932860 | 0.669881         | -                                       |
| <b>Si-M4-1</b>            | -2517.927713 | 0.668477         | -                                       |
| <b>Si-M4-2</b>            | -2517.936173 | 0.672081         | -                                       |
| <b>Si-M4-3</b>            | -2517.926641 | 0.670877         | -                                       |
| <b>TS4RR</b>              | -2517.918563 | 0.668321         | -192.45                                 |
| <b>TS4RS</b>              | -2517.923285 | 0.670755         | -131.78                                 |
| <b>TS4SR</b>              | -2517.924305 | 0.668776         | -32.49                                  |
| <b>TS4SS</b>              | -2517.921566 | 0.667895         | -113.41                                 |
| <b>M5RR</b>               | -2517.958712 | 0.674387         | -                                       |
| <b>M5RS</b>               | -2517.958352 | 0.672994         | -                                       |
| <b>M5SR</b>               | -2517.954532 | 0.670438         | -                                       |
| <b>M5SS</b>               | -2517.958418 | 0.672159         | -                                       |
| <b>TS5RR</b>              | -2517.936745 | 0.676588         | -194.31                                 |
| <b>TS5RS</b>              | -2517.940179 | 0.674128         | -255.21                                 |
| <b>TS5SR</b>              | -2517.934017 | 0.673905         | -106.19                                 |

|                    |              |          |         |
|--------------------|--------------|----------|---------|
| <b>TS5SS</b>       | -2517.935511 | 0.678812 | -66.34  |
| <b>M6RR</b>        | -2517.970163 | 0.680936 | -       |
| <b>M6RS</b>        | -2517.959266 | 0.677351 | -       |
| <b>M6SR</b>        | -2517.960693 | 0.678796 | -       |
| <b>M6SS</b>        | -2517.968485 | 0.67854  | -       |
| <b>TS6RR</b>       | -2517.952857 | 0.678762 | -109.22 |
| <b>TS6RS</b>       | -2517.946969 | 0.67376  | -148.31 |
| <b>TS6SR</b>       | -2517.943407 | 0.677417 | -135.36 |
| <b>TS6SS</b>       | -2517.954314 | 0.673682 | -109.49 |
| <b>M7RR</b>        | -1465.205070 | 0.295228 | -       |
| <b>M7RS</b>        | -1465.201764 | 0.293107 | -       |
| <b>M7SR</b>        | -1465.201756 | 0.293115 | -       |
| <b>M7SS</b>        | -1465.205062 | 0.295235 | -       |
| <b>TS7RR</b>       | -1847.577580 | 0.458881 | -273.36 |
| <b>TS7RS</b>       | -1847.570326 | 0.456912 | -250.33 |
| <b>TS7SR</b>       | -1847.570713 | 0.456524 | -250.36 |
| <b>TS7SS</b>       | -1847.578236 | 0.458221 | -273.50 |
| <b>PRR</b>         | -1276.721297 | 0.280568 | -       |
| <b>PRS</b>         | -1276.723025 | 0.279664 | -       |
| <b>PSR</b>         | -1276.723014 | 0.279675 | -       |
| <b>PSS</b>         | -1276.721297 | 0.280568 | -       |
| <b>TS6RR-Decar</b> | -2517.910323 | 0.677014 | -915.80 |
| <b>TS6RS-Decar</b> | -2517.897524 | 0.674174 | -917.30 |
| <b>TS6SR-Decar</b> | -2517.904033 | 0.675661 | -901.63 |
| <b>TS6SS-Decar</b> | -2517.900364 | 0.675066 | -977.18 |
| <b>TS7RR-D</b>     | -1465.168817 | 0.293416 | -283.92 |
| <b>TS7RS-D</b>     | -1465.154162 | 0.291334 | -429.17 |
| <b>TS7SR-D</b>     | -1465.154141 | 0.291355 | -428.28 |
| <b>TS7SS-D</b>     | -1465.168795 | 0.293438 | -286.72 |

## 2. Cartesian coordinates of all the stationary points

### R1

|   |             |             |             |
|---|-------------|-------------|-------------|
| C | -3.40926700 | 0.38266000  | -0.00014200 |
| O | -3.84506800 | -0.75055200 | 0.00018100  |
| H | -4.10252900 | 1.24611000  | 0.00011000  |
| C | -1.97287600 | 0.72176200  | -0.00007700 |
| C | -1.05294600 | -0.25571400 | -0.00006700 |
| H | -1.71240000 | 1.77589800  | -0.00004900 |
| H | -1.43349300 | -1.27710100 | -0.00009700 |
| C | 0.40375300  | -0.11049600 | -0.00002700 |
| C | 1.19223000  | -1.26845900 | -0.00004200 |
| C | 1.04276900  | 1.13874200  | 0.00002200  |

|   |            |             |             |
|---|------------|-------------|-------------|
| C | 2.58049200 | -1.18617500 | -0.00001000 |
| H | 0.70499500 | -2.23953300 | -0.00008000 |
| C | 2.42793600 | 1.22139700  | 0.00005500  |
| H | 0.45334300 | 2.05003800  | 0.00003200  |
| C | 3.20134000 | 0.05958700  | 0.00003800  |
| H | 3.17622900 | -2.09289000 | -0.00002400 |
| H | 2.90955000 | 2.19369000  | 0.00009200  |
| H | 4.28427700 | 0.12838800  | 0.00006200  |

**R2**

|   |             |             |             |
|---|-------------|-------------|-------------|
| C | 0.18395300  | 2.34443200  | -0.91230300 |
| C | -0.76681300 | 2.20223000  | -1.91038900 |
| C | -1.67490900 | 1.23225400  | -1.46936600 |
| C | -1.25434500 | 0.79769400  | -0.21117200 |
| N | -0.10412300 | 1.50147200  | 0.10783100  |
| H | 1.04709200  | 2.99350000  | -0.85017300 |
| H | -0.78934500 | 2.74287000  | -2.84390100 |
| H | -2.54479800 | 0.86742900  | -1.99494400 |
| C | -1.86339500 | -0.19876400 | 0.63579100  |
| O | -1.43795700 | -0.62700500 | 1.69443500  |
| C | -3.19453600 | -0.78436700 | 0.10635900  |
| F | -3.00347200 | -1.40784300 | -1.06515800 |
| F | -4.10115300 | 0.18077500  | -0.09266700 |
| F | -3.69492900 | -1.65886000 | 0.96753200  |
| C | 0.69523800  | 1.44878700  | 1.33119700  |
| H | 0.64539500  | 2.41204600  | 1.84219500  |
| H | 0.29267000  | 0.67129400  | 1.97822300  |
| C | 2.16337700  | 1.19631800  | 0.97444500  |
| O | 2.97955400  | 2.07170500  | 1.17924200  |
| C | 2.53747900  | -0.09965300 | 0.34063900  |
| C | 3.81501300  | -0.21052700 | -0.21875100 |
| C | 1.66372100  | -1.19051600 | 0.30682200  |
| C | 4.21241500  | -1.39877900 | -0.81594300 |
| H | 4.47745400  | 0.64750600  | -0.17389700 |
| C | 2.06865700  | -2.38266000 | -0.28598500 |
| H | 0.67890900  | -1.12638400 | 0.75945000  |
| C | 3.33775700  | -2.48542000 | -0.85020900 |
| H | 5.20140800  | -1.48249400 | -1.25383400 |
| H | 1.39333000  | -3.23122800 | -0.30568000 |
| H | 3.64830100  | -3.41526300 | -1.31583900 |

**R2-Anion**

|   |            |            |             |
|---|------------|------------|-------------|
| C | 0.63960700 | 2.51606800 | -0.04687400 |
| C | 1.99596600 | 2.87313500 | -0.06601700 |

|   |             |             |             |
|---|-------------|-------------|-------------|
| C | 2.73760000  | 1.70453700  | -0.01472700 |
| C | 1.82297500  | 0.62858200  | 0.03443600  |
| N | 0.53255600  | 1.16879100  | 0.01504700  |
| H | -0.26622800 | 3.09956200  | -0.07460000 |
| H | 2.37250300  | 3.88480900  | -0.11166000 |
| H | 3.81269600  | 1.60699600  | -0.01146400 |
| C | 2.12004500  | -0.76577000 | 0.06363400  |
| O | 1.36016600  | -1.72662300 | 0.10324700  |
| C | 3.63547100  | -1.09527200 | 0.03229900  |
| F | 4.28930200  | -0.56023100 | 1.07881000  |
| F | 4.22874000  | -0.62790400 | -1.07988600 |
| F | 3.83529100  | -2.41155200 | 0.06860000  |
| C | -0.66350500 | 0.42255600  | 0.04467600  |
| H | -0.51629900 | -0.62913200 | 0.19897800  |
| C | -1.90844900 | 1.01731300  | -0.07012700 |
| O | -2.16351100 | 2.25457200  | -0.17486400 |
| C | -3.09261600 | 0.07033200  | -0.03838300 |
| C | -4.34681800 | 0.61976700  | 0.24539000  |
| C | -3.01438200 | -1.30310700 | -0.30128900 |
| C | -5.48557900 | -0.17824100 | 0.29666500  |
| H | -4.39255600 | 1.69047600  | 0.41595200  |
| C | -4.15191000 | -2.10355200 | -0.25289400 |
| H | -2.06081300 | -1.74757600 | -0.56897200 |
| C | -5.39338100 | -1.54674300 | 0.05079500  |
| H | -6.44981900 | 0.26782200  | 0.52504000  |
| H | -4.07028000 | -3.16613700 | -0.46374900 |
| H | -6.28048400 | -2.17240500 | 0.08486800  |

**DMAP**

|   |             |             |             |
|---|-------------|-------------|-------------|
| C | -1.94792300 | -1.12959500 | 0.00550300  |
| C | -0.56372600 | -1.19682900 | -0.00979300 |
| C | 0.18364000  | -0.00003000 | -0.02209600 |
| C | -0.56372200 | 1.19681100  | -0.00968500 |
| C | -1.94789600 | 1.12962100  | 0.00561900  |
| N | -2.66360400 | 0.00000300  | 0.01279300  |
| H | -2.51903100 | -2.05610800 | 0.01404500  |
| H | -0.08090700 | -2.16552500 | -0.01111900 |
| H | -0.08085400 | 2.16548200  | -0.01089400 |
| H | -2.51901200 | 2.05612500  | 0.01427800  |
| N | 1.54973600  | -0.00000100 | -0.04536900 |
| C | 2.26874100  | 1.25683400  | 0.01785200  |
| H | 2.04680000  | 1.80779000  | 0.94057900  |
| H | 3.33893100  | 1.05709300  | -0.01292500 |
| H | 2.01902900  | 1.90001600  | -0.83355200 |

|   |            |             |             |
|---|------------|-------------|-------------|
| C | 2.26876100 | -1.25681700 | 0.01805100  |
| H | 2.01943100 | -1.89997900 | -0.83348400 |
| H | 3.33895900 | -1.05705000 | -0.01225100 |
| H | 2.04647200 | -1.80783300 | 0.94064900  |

**DMAP•H<sup>+</sup>**

|   |             |             |             |
|---|-------------|-------------|-------------|
| C | -1.87711000 | -1.17932000 | 0.01119400  |
| C | -0.51430000 | -1.21672500 | 0.00997200  |
| C | 0.23533300  | -0.00005100 | -0.00022500 |
| C | -0.51425600 | 1.21664000  | -0.01059900 |
| C | -1.87707100 | 1.17934700  | -0.01112200 |
| N | -2.54117400 | 0.00003400  | 0.00031700  |
| H | -2.48606500 | -2.07415400 | 0.02066200  |
| H | -0.02575200 | -2.18010700 | 0.02080700  |
| H | -0.02562000 | 2.17997500  | -0.02206400 |
| H | -2.48594600 | 2.07423500  | -0.02051000 |
| N | 1.56888400  | 0.00000500  | -0.00010600 |
| C | 2.30453300  | 1.26325200  | 0.01929800  |
| H | 2.03991200  | 1.85004600  | 0.90328600  |
| H | 3.36976500  | 1.04983900  | 0.05400500  |
| H | 2.09639800  | 1.84894600  | -0.88066600 |
| C | 2.30463100  | -1.26322200 | -0.01894400 |
| H | 2.04067900  | -1.85003100 | -0.90309700 |
| H | 3.36986700  | -1.04973500 | -0.05283900 |
| H | 2.09578100  | -1.84885100 | 0.88090200  |
| H | -3.55354900 | 0.00004000  | 0.00059000  |

**NHC**

|   |             |            |             |
|---|-------------|------------|-------------|
| C | 0.57038700  | 1.74729500 | -0.75856400 |
| C | 1.51607100  | 2.60652200 | -1.54403100 |
| C | 3.16052900  | 2.02959100 | -0.00088800 |
| C | 2.23426400  | 1.46470100 | 1.07479600  |
| C | -0.09110200 | 0.45298700 | 0.97088200  |
| H | 1.94841200  | 2.02303600 | -2.37022400 |
| H | 3.44983700  | 1.23614900 | -0.70539800 |
| H | 2.06845800  | 2.24335300 | 1.82763200  |
| N | -0.64303700 | 1.41327800 | -1.06658600 |
| N | -1.01598000 | 0.62146000 | 0.00319700  |
| N | 0.94168900  | 1.18640500 | 0.43900800  |
| H | 4.06284300  | 2.43185200 | 0.46551300  |
| H | 0.98798600  | 3.46470700 | -1.96202900 |
| O | 2.53480000  | 3.09340400 | -0.69596600 |
| C | 2.80986200  | 0.22704400 | 1.77951900  |
| H | 3.70023800  | 0.55476600 | 2.32757000  |

|   |             |             |             |
|---|-------------|-------------|-------------|
| H | 2.07188100  | -0.10219100 | 2.51524000  |
| C | 3.16520900  | -0.91411700 | 0.85525100  |
| C | 4.45924400  | -1.05143400 | 0.34517000  |
| C | 2.19544400  | -1.84927000 | 0.48275500  |
| C | 4.77531500  | -2.08966700 | -0.52783200 |
| H | 5.22754100  | -0.33925300 | 0.63854400  |
| C | 2.50731800  | -2.88764000 | -0.39031300 |
| H | 1.19339100  | -1.74651200 | 0.88733900  |
| C | 3.79800200  | -3.00943300 | -0.90063200 |
| H | 5.78589500  | -2.18255100 | -0.91279000 |
| H | 1.74089000  | -3.60555100 | -0.66764000 |
| H | 4.04310100  | -3.81984600 | -1.57950000 |
| C | -2.34326900 | 0.08654400  | 0.01417500  |
| C | -3.41441400 | 0.97033100  | 0.18994300  |
| C | -2.53312000 | -1.28476000 | -0.16749200 |
| C | -4.70358900 | 0.44398200  | 0.18221500  |
| C | -3.84336000 | -1.76687900 | -0.16546000 |
| C | -4.93725000 | -0.92166100 | 0.00823800  |
| H | -5.54702000 | 1.11697000  | 0.31885100  |
| H | -4.00977300 | -2.83177400 | -0.31048300 |
| C | -3.17103700 | 2.44263800  | 0.38803400  |
| H | -2.40588000 | 2.60820900  | 1.15267300  |
| H | -2.80996200 | 2.90622300  | -0.53400000 |
| H | -4.08892200 | 2.94577600  | 0.69716000  |
| C | -6.34195100 | -1.46763100 | 0.03406700  |
| H | -6.68614800 | -1.60432400 | 1.06437100  |
| H | -7.03997800 | -0.78501200 | -0.45691800 |
| H | -6.39916600 | -2.43676600 | -0.46633200 |
| C | -1.36986400 | -2.22407100 | -0.34414900 |
| H | -0.58071200 | -1.77729900 | -0.95513600 |
| H | -0.92892300 | -2.47307200 | 0.62650800  |
| H | -1.69722900 | -3.15255300 | -0.81666500 |

**DQ**

|   |             |             |             |
|---|-------------|-------------|-------------|
| C | -2.80847300 | 1.28105500  | 0.06787600  |
| C | -1.45904100 | 1.23397200  | 0.05902900  |
| C | -0.69378100 | 0.00006300  | -0.00028500 |
| C | -1.45900500 | -1.23386200 | -0.05985000 |
| C | -2.80843600 | -1.28102700 | -0.06796900 |
| C | -3.57341300 | -0.00003500 | 0.00065300  |
| H | -0.91526500 | 2.16404800  | 0.12828700  |
| H | -0.91519300 | -2.16384800 | -0.13003400 |
| C | 0.69377100  | 0.00005500  | -0.00005900 |
| C | 1.45898900  | -1.23387000 | 0.05956000  |



|   |             |             |             |
|---|-------------|-------------|-------------|
| C | 1.45903700  | 1.23396500  | -0.05933500 |
| C | 2.80841900  | -1.28103800 | 0.06792500  |
| H | 0.91516600  | -2.16386300 | 0.12957200  |
| C | 2.80847100  | 1.28104100  | -0.06791000 |
| H | 0.91527200  | 2.16403100  | -0.12880500 |
| C | 3.57340300  | -0.00003300 | -0.00034800 |
| C | -3.58544400 | -2.59471600 | -0.15050900 |
| C | -4.45936000 | -2.60904600 | -1.41946400 |
| C | -2.64333600 | -3.80294600 | -0.21744700 |
| C | -4.47076100 | -2.75832200 | 1.10024900  |
| H | -5.19706800 | -1.80744900 | -1.40366200 |
| H | -3.83784800 | -2.50191900 | -2.31433100 |
| H | -4.98534500 | -3.56707400 | -1.48566600 |
| H | -2.00785300 | -3.87435100 | 0.67154200  |
| H | -3.24119500 | -4.71682300 | -0.27196300 |
| H | -2.00272100 | -3.77221700 | -1.10497800 |
| H | -4.99399200 | -3.71880500 | 1.04949600  |
| H | -3.85751100 | -2.75483900 | 2.00716400  |
| H | -5.21067300 | -1.96174100 | 1.17089300  |
| C | -3.58550200 | 2.59476000  | 0.15010800  |
| C | -4.47236800 | 2.75712000  | -1.09970400 |
| C | -4.45791700 | 2.61015300  | 1.42009900  |
| C | -2.64344300 | 3.80314100  | 0.21482300  |
| H | -3.86024300 | 2.75304400  | -2.00737600 |
| H | -5.21216700 | 1.96028900  | -1.16877000 |
| H | -4.99579600 | 3.71750200  | -1.04910000 |
| H | -3.83535700 | 2.50353300  | 2.31429600  |
| H | -4.98363100 | 3.56833400  | 1.48624700  |
| H | -5.19577200 | 1.80866300  | 1.40571600  |
| H | -3.24133400 | 4.71702800  | 0.26883000  |
| H | -2.00204200 | 3.77348900  | 1.10182600  |
| H | -2.00875100 | 3.87358500  | -0.67480700 |
| C | 3.58556000  | 2.59470400  | -0.15014000 |
| C | 4.45842500  | 2.60982300  | -1.41982800 |
| C | 2.64353700  | 3.80309200  | -0.21545800 |
| C | 4.47193600  | 2.75732600  | 1.09997800  |
| H | 5.19638500  | 1.80844200  | -1.40494100 |
| H | 3.83619000  | 2.50282400  | -2.31420600 |
| H | 4.98401700  | 3.56806000  | -1.48609600 |
| H | 2.00857900  | 3.87377500  | 0.67396500  |
| H | 3.24145400  | 4.71695700  | -0.26951500 |
| H | 2.00239500  | 3.77321000  | -1.10264000 |
| H | 4.99548900  | 3.71763800  | 1.04931400  |
| H | 3.85942300  | 2.75359300  | 2.00739000  |

|   |             |             |             |
|---|-------------|-------------|-------------|
| H | 5.21162100  | 1.96044100  | 1.16960500  |
| C | 3.58539500  | -2.59475000 | 0.15046000  |
| C | 4.45889400  | -2.60927700 | 1.41971200  |
| C | 2.64328100  | -3.80299600 | 0.21689100  |
| C | 4.47116500  | -2.75812100 | -1.10000000 |
| H | 5.19678400  | -1.80784100 | 1.40413500  |
| H | 3.83711000  | -2.50199100 | 2.31436800  |
| H | 4.98462600  | -3.56743100 | 1.48609400  |
| H | 2.00796700  | -3.87417300 | -0.67223700 |
| H | 3.24113000  | -4.71688700 | 0.27127700  |
| H | 2.00249700  | -3.77249600 | 1.10431000  |
| H | 4.99455800  | -3.71850800 | -1.04912500 |
| H | 3.85823900  | -2.75468700 | -2.00713400 |
| H | 5.21095500  | -1.96139400 | -1.17032300 |
| O | 4.79998800  | -0.00007300 | -0.00088500 |
| O | -4.80000300 | -0.00011900 | 0.00176500  |

**DQ•H<sup>-</sup>**

|   |             |             |             |
|---|-------------|-------------|-------------|
| C | 0.71584900  | -0.00080000 | 0.00734200  |
| C | 1.44892300  | -1.15209600 | 0.32636000  |
| C | 2.84345600  | -1.19357200 | 0.29979500  |
| C | 3.52346400  | -0.01201900 | -0.04913800 |
| C | 2.84035200  | 1.18609900  | -0.32851400 |
| C | 1.44534300  | 1.15260900  | -0.31087700 |
| C | -0.75740700 | -0.00178800 | 0.01101300  |
| C | -1.48976700 | -1.16107200 | -0.29052100 |
| C | -2.87432000 | -1.20011900 | -0.30995500 |
| C | -3.64052400 | -0.00373500 | -0.00312200 |
| C | -2.87888400 | 1.19364200  | 0.31139000  |
| C | -1.49413000 | 1.15634700  | 0.30627800  |
| H | 0.89286600  | -2.03202500 | 0.62437500  |
| H | 0.88579700  | 2.04076600  | -0.57595300 |
| H | -0.93069700 | -2.05448200 | -0.55569500 |
| H | -0.93925900 | 2.05082800  | 0.57645500  |
| C | 3.60287100  | -2.47971500 | 0.67023500  |
| C | 2.64285100  | -3.62312200 | 1.02890300  |
| C | 4.45931000  | -2.96820100 | -0.51256100 |
| C | 4.49850800  | -2.22898500 | 1.89661000  |
| H | 2.01388100  | -3.37040400 | 1.88742400  |
| H | 1.99104700  | -3.88638900 | 0.18991500  |
| H | 3.22766300  | -4.51017800 | 1.29185200  |
| H | 5.27852000  | -2.28230800 | -0.73107600 |
| H | 4.89932800  | -3.94312100 | -0.27462100 |
| H | 3.84533200  | -3.08426600 | -1.41144200 |

|   |             |             |             |
|---|-------------|-------------|-------------|
| H | 5.02593100  | -3.15109900 | 2.16773500  |
| H | 5.23433800  | -1.45026300 | 1.69520100  |
| H | 3.88964500  | -1.92189400 | 2.75282000  |
| C | 3.59396800  | 2.49339100  | -0.63269900 |
| C | 4.46358300  | 2.88270400  | 0.57646500  |
| C | 4.47672900  | 2.35577500  | -1.88733900 |
| C | 2.62700500  | 3.65693300  | -0.89600500 |
| H | 3.83463000  | 3.04201600  | 1.45790600  |
| H | 5.19203900  | 2.10410700  | 0.80423300  |
| H | 4.99827300  | 3.81635900  | 0.36612500  |
| H | 3.89794500  | 1.96194500  | -2.72866700 |
| H | 4.86682800  | 3.33813000  | -2.17549100 |
| H | 5.33824800  | 1.70855200  | -1.71575500 |
| H | 3.20647800  | 4.56926200  | -1.06822800 |
| H | 2.00729000  | 3.48022200  | -1.78057300 |
| H | 1.96626500  | 3.83522500  | -0.04269100 |
| C | -3.64180500 | 2.47919200  | 0.65176900  |
| C | -2.70771400 | 3.65556700  | 0.96042300  |
| C | -4.52518300 | 2.88931800  | -0.54088800 |
| C | -4.52575400 | 2.24944200  | 1.89085100  |
| H | -2.07034000 | 3.45234600  | 1.82785200  |
| H | -2.06053900 | 3.89502000  | 0.10935300  |
| H | -3.30705200 | 4.54481300  | 1.18618800  |
| H | -5.21519800 | 2.08105000  | -0.78305500 |
| H | -5.09329600 | 3.79747600  | -0.30062200 |
| H | -3.90066300 | 3.09974000  | -1.41677900 |
| H | -5.11283700 | 3.14948800  | 2.11521000  |
| H | -5.19852300 | 1.41018400  | 1.71270900  |
| H | -3.89970300 | 2.02545100  | 2.76196600  |
| C | -3.63221800 | -2.48568900 | -0.66125600 |
| C | -2.69390800 | -3.66086300 | -0.96131200 |
| C | -4.52876600 | -2.89882300 | 0.52036000  |
| C | -4.50194900 | -2.25394000 | -1.91021700 |
| H | -2.04553200 | -3.45482600 | -1.81988300 |
| H | -2.05761600 | -3.90276700 | -0.10277800 |
| H | -3.29005500 | -4.54957300 | -1.19751400 |
| H | -5.22291000 | -2.09199900 | 0.75541200  |
| H | -5.09247500 | -3.80767400 | 0.27238900  |
| H | -3.91409800 | -3.10906900 | 1.40316600  |
| H | -5.08999600 | -3.15196400 | -2.14006100 |
| H | -5.17335500 | -1.41192300 | -1.73982900 |
| H | -3.86594000 | -2.03339700 | -2.77515000 |
| O | -4.91500800 | -0.00454300 | -0.00989800 |
| O | 4.92054000  | -0.02078600 | -0.06802700 |

|                       |             |             |             |
|-----------------------|-------------|-------------|-------------|
| H                     | 5.20417700  | -0.15960700 | -0.97935300 |
| <b>CO<sub>2</sub></b> |             |             |             |
| C                     | 0.00000000  | 0.00052400  | 0.00000000  |
| O                     | 1.16273800  | 0.00188000  | 0.00000000  |
| O                     | -1.16273800 | -0.00227300 | 0.00000000  |
| <b>Re-TS1</b>         |             |             |             |
| C                     | -0.56782200 | 0.94061900  | 2.16352500  |
| C                     | -0.01368700 | 1.68809000  | 3.33881600  |
| C                     | 1.85096200  | 2.18525700  | 2.05214200  |
| C                     | 1.56719000  | 1.24488200  | 0.87787000  |
| C                     | -0.51841000 | -0.01254000 | 0.16100100  |
| H                     | -0.37620400 | 2.72600800  | 3.33301400  |
| H                     | 1.37310400  | 3.15877700  | 1.87748000  |
| H                     | 2.22204500  | 0.36915800  | 0.94489500  |
| N                     | -1.72340800 | 0.35943100  | 2.05675200  |
| N                     | -1.66895700 | -0.21987800 | 0.81125600  |
| N                     | 0.18666800  | 0.75274300  | 1.03155400  |
| H                     | 2.92951900  | 2.33145700  | 2.13872000  |
| H                     | -0.33164700 | 1.20813300  | 4.26521200  |
| O                     | 1.39478700  | 1.64731900  | 3.28063600  |
| C                     | 1.79096200  | 1.91820400  | -0.48735900 |
| H                     | 2.84225400  | 2.22896400  | -0.51143400 |
| H                     | 1.64421100  | 1.16384900  | -1.26742800 |
| C                     | 0.88037500  | 3.09065000  | -0.76695600 |
| C                     | 1.19150300  | 4.39010500  | -0.35464800 |
| C                     | -0.31147100 | 2.87219700  | -1.46468500 |
| C                     | 0.31509300  | 5.44423600  | -0.60167200 |
| H                     | 2.13472900  | 4.58227600  | 0.15244000  |
| C                     | -1.19022300 | 3.92491100  | -1.70936000 |
| H                     | -0.50870100 | 1.87253800  | -1.84748100 |
| C                     | -0.88373800 | 5.21162700  | -1.27184700 |
| H                     | 0.57245000  | 6.44770400  | -0.27755200 |
| H                     | -2.11028400 | 3.74069600  | -2.25666900 |
| H                     | -1.56651500 | 6.03257200  | -1.46639600 |
| C                     | -2.78376800 | -0.99767400 | 0.35068900  |
| C                     | -3.46663900 | -0.59229300 | -0.80050700 |
| C                     | -3.13424900 | -2.14354700 | 1.07334500  |
| C                     | -4.54569700 | -1.37359800 | -1.21446200 |
| C                     | -4.22301500 | -2.88492600 | 0.61973000  |
| C                     | -4.94280800 | -2.51328500 | -0.51662500 |
| H                     | -5.08945800 | -1.07862400 | -2.10838700 |
| H                     | -4.50864400 | -3.78218100 | 1.16333900  |

|   |             |             |             |
|---|-------------|-------------|-------------|
| C | -3.04651200 | 0.62065500  | -1.58705600 |
| H | -2.81509200 | 1.46232200  | -0.92720200 |
| H | -2.14764200 | 0.41314800  | -2.18135100 |
| H | -3.84581200 | 0.92247100  | -2.26680100 |
| C | -6.13552600 | -3.31623600 | -0.96704600 |
| H | -7.04777200 | -2.95887100 | -0.47843700 |
| H | -6.28351900 | -3.23301100 | -2.04592200 |
| H | -6.01846000 | -4.37263900 | -0.71478200 |
| C | -2.35310800 | -2.57744300 | 2.28582100  |
| H | -1.27593000 | -2.53596200 | 2.09500100  |
| H | -2.55374600 | -1.92399600 | 3.13855200  |
| H | -2.61570100 | -3.60060000 | 2.55958600  |
| C | 0.03640200  | -0.91441900 | -1.52742900 |
| O | 0.19776900  | -0.12216000 | -2.48407600 |
| H | -0.87625100 | -1.54637200 | -1.48630100 |
| C | 1.22060700  | -1.60749300 | -0.90044800 |
| C | 2.44800600  | -1.45534100 | -1.40741200 |
| H | 1.01958300  | -2.25320800 | -0.04529300 |
| H | 2.52736400  | -0.83575300 | -2.30026700 |
| C | 3.69247200  | -2.04929200 | -0.89545500 |
| C | 4.83177500  | -2.05465400 | -1.71025200 |
| C | 3.79201200  | -2.60141600 | 0.39008400  |
| C | 6.02712800  | -2.61176500 | -1.26721400 |
| H | 4.77009800  | -1.62112100 | -2.70465400 |
| C | 4.98527200  | -3.15727200 | 0.83456000  |
| H | 2.93014700  | -2.58267900 | 1.05100000  |
| C | 6.10782000  | -3.16737400 | 0.00687200  |
| H | 6.89659800  | -2.61020100 | -1.91684100 |
| H | 5.04362200  | -3.57807400 | 1.83342300  |
| H | 7.03966700  | -3.59931600 | 0.35697500  |

**Re-M1**

|   |             |             |            |
|---|-------------|-------------|------------|
| C | -0.99470900 | 1.43506900  | 1.61272100 |
| C | -0.69838400 | 2.58888200  | 2.51350500 |
| C | 1.57555900  | 2.43698800  | 2.05017500 |
| C | 1.40155200  | 1.43041000  | 0.87582100 |
| C | -0.45122500 | -0.22069000 | 0.28616000 |
| H | -0.72611500 | 3.53588800  | 1.95463000 |
| H | 1.58442200  | 3.45676200  | 1.64818600 |
| H | 2.08193200  | 0.58527000  | 0.99476100 |
| N | -2.09948500 | 0.77100900  | 1.45473900 |
| N | -1.74336400 | -0.25189800 | 0.61649600 |
| N | 0.04116500  | 0.86492400  | 0.92142200 |
| H | 2.53108500  | 2.24602800  | 2.53996300 |

|   |             |             |             |
|---|-------------|-------------|-------------|
| H | -1.42083300 | 2.62328400  | 3.32888700  |
| O | 0.58473800  | 2.34893500  | 3.05505400  |
| C | 1.67377500  | 2.09715200  | -0.49043100 |
| H | 2.68089200  | 2.52645100  | -0.43780300 |
| H | 1.64955500  | 1.30505600  | -1.24598700 |
| C | 0.64906500  | 3.15145600  | -0.83540900 |
| C | 0.84541100  | 4.50679300  | -0.55177200 |
| C | -0.55596900 | 2.75398100  | -1.42972200 |
| C | -0.15373300 | 5.44220000  | -0.81557000 |
| H | 1.79329300  | 4.83781300  | -0.13326000 |
| C | -1.55488800 | 3.68829000  | -1.68959400 |
| H | -0.66424800 | 1.70556100  | -1.70780700 |
| C | -1.36185200 | 5.03237600  | -1.37360500 |
| H | 0.01537700  | 6.49054200  | -0.59058400 |
| H | -2.48320400 | 3.36890200  | -2.15438500 |
| H | -2.14135800 | 5.75935000  | -1.57815500 |
| C | -2.71910200 | -1.23899700 | 0.23903500  |
| C | -3.33096800 | -1.13275300 | -1.01165200 |
| C | -3.01114700 | -2.25192600 | 1.15466500  |
| C | -4.27985100 | -2.10164000 | -1.33573800 |
| C | -3.96834300 | -3.19352600 | 0.78360500  |
| C | -4.61221900 | -3.13088300 | -0.45375000 |
| H | -4.76948500 | -2.04954800 | -2.30478800 |
| H | -4.21221400 | -3.99654600 | 1.47449000  |
| C | -2.95356400 | -0.03147100 | -1.96371200 |
| H | -3.05781700 | 0.94527800  | -1.47760200 |
| H | -1.90381600 | -0.13587300 | -2.27252800 |
| H | -3.59760300 | -0.04985000 | -2.84445400 |
| C | -5.66638500 | -4.14297900 | -0.82080700 |
| H | -6.65807500 | -3.79246300 | -0.51707200 |
| H | -5.69184600 | -4.31268500 | -1.89940300 |
| H | -5.48678800 | -5.09903200 | -0.32422200 |
| C | -2.30030000 | -2.32057700 | 2.47981100  |
| H | -1.21703800 | -2.40422600 | 2.33902700  |
| H | -2.48399700 | -1.41874000 | 3.07080400  |
| H | -2.63656800 | -3.18585100 | 3.05252100  |
| C | 0.22613400  | -1.06919000 | -0.80911900 |
| O | 0.29253700  | -0.31381900 | -1.90514500 |
| H | -0.44563600 | -1.96315500 | -0.87664400 |
| C | 1.54600900  | -1.60903100 | -0.26177700 |
| C | 2.67466700  | -1.45005400 | -0.95580400 |
| H | 1.50842200  | -2.16094600 | 0.67949900  |
| H | 2.57362200  | -0.89822400 | -1.89019200 |
| C | 4.01968500  | -1.93381300 | -0.60451900 |

|   |            |             |             |
|---|------------|-------------|-------------|
| C | 5.09221900 | -1.61654400 | -1.44773000 |
| C | 4.28422100 | -2.69825900 | 0.54167100  |
| C | 6.38540800 | -2.04221900 | -1.15948900 |
| H | 4.90104000 | -1.02817200 | -2.34105700 |
| C | 5.57412100 | -3.12412700 | 0.83179700  |
| H | 3.47175700 | -2.96708500 | 1.21002100  |
| C | 6.63204800 | -2.79794900 | -0.01702800 |
| H | 7.19999200 | -1.78464300 | -1.82904800 |
| H | 5.75688800 | -3.71670000 | 1.72284500  |
| H | 7.63852600 | -3.13344100 | 0.21104200  |

**Re-M02**

|   |             |             |             |
|---|-------------|-------------|-------------|
| C | -1.95542500 | -2.22544600 | 1.73664500  |
| C | -3.13890000 | -3.02736400 | 2.18303200  |
| C | -4.55287900 | -1.60827800 | 1.02291400  |
| C | -3.46769000 | -0.66302800 | 0.45875100  |
| C | -0.94724600 | -0.50114900 | 0.86743100  |
| H | -3.35146600 | -3.83462900 | 1.46869400  |
| H | -4.72627100 | -2.43270300 | 0.32152400  |
| H | -3.62867900 | 0.35394400  | 0.82270400  |
| N | -0.70035100 | -2.37797100 | 2.05011100  |
| N | -0.08753100 | -1.30060500 | 1.49256300  |
| N | -2.15190700 | -1.08718600 | 0.99701500  |
| H | -5.47738600 | -1.04070800 | 1.13590300  |
| H | -2.93940100 | -3.45660600 | 3.16507800  |
| O | -4.22514600 | -2.13573700 | 2.29133900  |
| C | -3.46383200 | -0.66029600 | -1.08311200 |
| H | -4.45839800 | -0.31867700 | -1.39095900 |
| H | -2.74184200 | 0.08636400  | -1.42623500 |
| C | -3.14739200 | -2.00548500 | -1.69475600 |
| C | -4.15856900 | -2.88975400 | -2.08259800 |
| C | -1.81459700 | -2.39317300 | -1.86497500 |
| C | -3.84598800 | -4.14495800 | -2.59881600 |
| H | -5.19974000 | -2.58932600 | -1.99058100 |
| C | -1.49940200 | -3.64890600 | -2.37700400 |
| H | -1.02959300 | -1.67977900 | -1.62901100 |
| C | -2.51516600 | -4.53121900 | -2.73811800 |
| H | -4.64246000 | -4.81827900 | -2.89782500 |
| H | -0.45963200 | -3.93265300 | -2.50960100 |
| H | -2.27158300 | -5.50865600 | -3.14086200 |
| C | 1.33331300  | -1.09880200 | 1.63149200  |
| C | 2.17353500  | -1.63374600 | 0.65376400  |
| C | 1.78987600  | -0.37266800 | 2.73382600  |
| C | 3.54012100  | -1.41461000 | 0.80603400  |

|   |             |             |             |
|---|-------------|-------------|-------------|
| C | 3.16442000  | -0.16727400 | 2.82973000  |
| C | 4.04877600  | -0.67878400 | 1.87740900  |
| H | 4.22120000  | -1.80949300 | 0.05679800  |
| H | 3.55323000  | 0.40336400  | 3.66885200  |
| C | 1.61224800  | -2.37458000 | -0.52795600 |
| H | 0.90298300  | -3.14810700 | -0.21737800 |
| H | 1.08049900  | -1.67547600 | -1.18312800 |
| H | 2.41192800  | -2.84324500 | -1.10366800 |
| C | 5.53120300  | -0.45179800 | 2.00691200  |
| H | 5.99926700  | -1.26948100 | 2.56404500  |
| H | 6.00607100  | -0.40347200 | 1.02234700  |
| H | 5.74094200  | 0.47618900  | 2.54496600  |
| C | 0.82808500  | 0.16904000  | 3.75792100  |
| H | 0.18377600  | 0.94648000  | 3.33093900  |
| H | 0.17950100  | -0.62223900 | 4.14417900  |
| H | 1.36876500  | 0.60971400  | 4.59591400  |
| C | -0.55322100 | 0.79216500  | 0.17693400  |
| O | -0.33548400 | 0.54251700  | -1.17543500 |
| H | 0.64713500  | 0.74132200  | -1.34545700 |
| C | -1.56567200 | 1.87885300  | 0.44505300  |
| C | -2.10447400 | 2.60751100  | -0.53502100 |
| H | -1.80489000 | 2.05397300  | 1.49325400  |
| H | -1.80388600 | 2.36761600  | -1.55370800 |
| C | -3.08396600 | 3.69519500  | -0.38486900 |
| C | -3.68279800 | 4.21656200  | -1.53786700 |
| C | -3.44895100 | 4.22743900  | 0.85987700  |
| C | -4.62932400 | 5.23283700  | -1.45406400 |
| H | -3.40197700 | 3.81609400  | -2.50802600 |
| C | -4.39309000 | 5.24222800  | 0.94440000  |
| H | -2.98386200 | 3.85880400  | 1.76913100  |
| C | -4.98827500 | 5.74746200  | -0.21187600 |
| H | -5.08356100 | 5.62360200  | -2.35845700 |
| H | -4.66270500 | 5.64671400  | 1.91445000  |
| H | -5.72338800 | 6.54228800  | -0.14247900 |
| C | 3.01198000  | 0.22024200  | -2.17542000 |
| C | 4.39223200  | 0.21839000  | -2.19074800 |
| C | 5.09882700  | 1.03491800  | -1.27565000 |
| C | 4.30894000  | 1.82580700  | -0.40872800 |
| C | 2.93305000  | 1.74386400  | -0.48067300 |
| N | 2.26617300  | 0.95714900  | -1.33843800 |
| H | 2.46570400  | -0.40382000 | -2.87844700 |
| H | 4.90820200  | -0.40249800 | -2.91066300 |
| H | 4.75791400  | 2.49016800  | 0.31765800  |
| H | 2.32779500  | 2.35214600  | 0.18701800  |



|   |            |             |             |
|---|------------|-------------|-------------|
| N | 6.45617100 | 1.05464600  | -1.22761000 |
| C | 7.13264000 | 2.01871900  | -0.37483800 |
| H | 6.88681500 | 1.85202500  | 0.67955600  |
| H | 8.20849200 | 1.90397100  | -0.49240300 |
| H | 6.86223800 | 3.04791400  | -0.63766300 |
| C | 7.22328000 | 0.25858800  | -2.17208500 |
| H | 7.05510200 | 0.57939800  | -3.20701300 |
| H | 8.28285700 | 0.36295400  | -1.94604300 |
| H | 6.96193600 | -0.80122600 | -2.08808200 |
| H | 0.39148300 | 1.06853600  | 0.67423300  |

**Re-TS2**

|   |             |             |             |
|---|-------------|-------------|-------------|
| C | -1.28497700 | -3.25309200 | 1.22155600  |
| C | -2.34047500 | -3.99785300 | 1.98596400  |
| C | -3.88054900 | -2.43650800 | 1.23881100  |
| C | -2.89952900 | -1.41771400 | 0.63172500  |
| C | -0.38532300 | -1.52940800 | 0.19061700  |
| H | -2.75558800 | -4.80676000 | 1.36869500  |
| H | -4.15299200 | -3.18128700 | 0.47444700  |
| H | -2.91991300 | -0.49127600 | 1.21069100  |
| N | -0.06831100 | -3.62432200 | 0.95908000  |
| N | 0.47696600  | -2.55193200 | 0.31483300  |
| N | -1.54045600 | -1.99286500 | 0.74148900  |
| H | -4.78627600 | -1.91718000 | 1.55152500  |
| H | -1.90540600 | -4.43069100 | 2.88788200  |
| O | -3.34008100 | -3.08492700 | 2.37063200  |
| C | -3.25653300 | -1.14344300 | -0.83792000 |
| H | -2.50184000 | -0.49231500 | -1.28714900 |
| H | -3.23866800 | -2.09770400 | -1.37702800 |
| C | -4.62361400 | -0.50443800 | -0.93350400 |
| C | -4.79318300 | 0.82796700  | -0.54339800 |
| C | -5.73348400 | -1.22657700 | -1.37537500 |
| C | -6.04735000 | 1.42687100  | -0.59832200 |
| H | -3.93356900 | 1.40230400  | -0.20765700 |
| C | -6.99102400 | -0.62856300 | -1.42973900 |
| H | -5.61262400 | -2.26063000 | -1.68862800 |
| C | -7.15047800 | 0.69866100  | -1.04096500 |
| H | -6.15782700 | 2.46496500  | -0.30096700 |
| H | -7.84462300 | -1.19984800 | -1.77975000 |
| H | -8.12906000 | 1.16502700  | -1.08645500 |
| C | 1.87340300  | -2.55531500 | -0.01509600 |
| C | 2.26745700  | -2.96665200 | -1.28922800 |
| C | 2.77698800  | -2.20316800 | 0.99416300  |
| C | 3.64056200  | -3.00321900 | -1.54843900 |

|   |             |             |             |
|---|-------------|-------------|-------------|
| C | 4.13332000  | -2.26368100 | 0.68809600  |
| C | 4.58140200  | -2.66169100 | -0.57555900 |
| H | 3.97888900  | -3.31848000 | -2.53185900 |
| H | 4.85848400  | -1.98919400 | 1.45022400  |
| C | 1.24969400  | -3.36121700 | -2.32435000 |
| H | 0.62970800  | -4.18559300 | -1.95929700 |
| H | 0.59184600  | -2.51694300 | -2.55008100 |
| H | 1.74114800  | -3.68311200 | -3.24333700 |
| C | 6.05789200  | -2.71664600 | -0.86832900 |
| H | 6.53261300  | -3.52433700 | -0.30361100 |
| H | 6.24897100  | -2.88887100 | -1.92888800 |
| H | 6.54779300  | -1.78363700 | -0.57424900 |
| C | 2.28262900  | -1.76450200 | 2.34587800  |
| H | 1.63587000  | -0.88320000 | 2.25797900  |
| H | 1.69640200  | -2.55564500 | 2.82255000  |
| H | 3.11792700  | -1.51122100 | 2.99965900  |
| C | -0.08671000 | -0.21251900 | -0.34085800 |
| O | 0.12203200  | -0.28074800 | -1.74466000 |
| H | 1.29941200  | 0.32644300  | 0.07092600  |
| C | -0.90546400 | 0.90121000  | 0.13180800  |
| C | -1.28080600 | 1.95501800  | -0.61876500 |
| H | -1.11036400 | 0.90406800  | 1.20476900  |
| H | -1.11016100 | 1.90849100  | -1.69294400 |
| C | -1.98263000 | 3.14373600  | -0.11746000 |
| C | -2.74572500 | 3.91485600  | -1.00732100 |
| C | -1.95391100 | 3.52863200  | 1.23174700  |
| C | -3.47164100 | 5.01486700  | -0.56332600 |
| H | -2.78012300 | 3.63124800  | -2.05587500 |
| C | -2.68133000 | 4.62654700  | 1.67641200  |
| H | -1.34498300 | 2.97123500  | 1.93800600  |
| C | -3.44624900 | 5.37417500  | 0.78248300  |
| H | -4.05956900 | 5.59188600  | -1.26991100 |
| H | -2.64460000 | 4.90649800  | 2.72449400  |
| H | -4.01018500 | 6.23284900  | 1.13098400  |
| C | 2.41012400  | 2.08456500  | 0.75790900  |
| C | 3.55942500  | 2.83166700  | 0.78067700  |
| C | 4.69023900  | 2.40827200  | 0.02590700  |
| C | 4.54119500  | 1.21242200  | -0.72954200 |
| C | 3.35382800  | 0.52683900  | -0.68821800 |
| N | 2.30814900  | 0.94814000  | 0.04485900  |
| H | 1.52482400  | 2.37817500  | 1.31314900  |
| H | 3.58360100  | 3.73351500  | 1.37605400  |
| H | 5.34340900  | 0.82411100  | -1.34209600 |
| H | 3.20557200  | -0.39341800 | -1.24616600 |

|   |            |            |             |
|---|------------|------------|-------------|
| N | 5.84053200 | 3.10441100 | 0.02676500  |
| C | 6.98391100 | 2.62469600 | -0.73879000 |
| H | 6.75610800 | 2.58935000 | -1.80877700 |
| H | 7.81975200 | 3.30412900 | -0.58816100 |
| H | 7.28712700 | 1.62643200 | -0.40630400 |
| C | 5.95242400 | 4.33356800 | 0.80254600  |
| H | 5.81881000 | 4.13897600 | 1.87140200  |
| H | 6.94276300 | 4.75677800 | 0.65069200  |
| H | 5.21075200 | 5.07022400 | 0.47922800  |
| H | 0.77178100 | 0.39582500 | -1.98191100 |

**Re-M2**

|   |             |             |             |
|---|-------------|-------------|-------------|
| C | -1.41967500 | 1.55938400  | 1.69927100  |
| C | -1.49488300 | 2.72774800  | 2.63733700  |
| C | 0.66966800  | 3.26358700  | 2.05857400  |
| C | 0.99905500  | 2.00133300  | 1.24117800  |
| C | -0.42919600 | 0.00510800  | 0.45409600  |
| H | -1.90363200 | 3.60686100  | 2.11858000  |
| H | 0.22010600  | 4.02320900  | 1.40477100  |
| H | 1.79234900  | 1.45690300  | 1.76202800  |
| N | -2.39420100 | 0.82186600  | 1.30212100  |
| N | -1.80399000 | -0.12242600 | 0.46980800  |
| N | -0.19456400 | 1.15140700  | 1.20864700  |
| H | 1.59569600  | 3.66403800  | 2.47548100  |
| H | -2.14240900 | 2.48332100  | 3.48060700  |
| O | -0.20315600 | 2.99643300  | 3.13516200  |
| C | 1.50235900  | 2.39326000  | -0.16846900 |
| H | 2.35987500  | 3.05867200  | -0.01373800 |
| H | 1.87987200  | 1.50324000  | -0.67712300 |
| C | 0.46718300  | 3.07919900  | -1.03086500 |
| C | 0.40976200  | 4.47431100  | -1.11231800 |
| C | -0.45592400 | 2.33070700  | -1.77006500 |
| C | -0.55591800 | 5.10896100  | -1.88942500 |
| H | 1.13853700  | 5.07044600  | -0.56767100 |
| C | -1.42258600 | 2.96251000  | -2.54784400 |
| H | -0.40126300 | 1.24528200  | -1.75176800 |
| C | -1.47989100 | 4.35303400  | -2.60565700 |
| H | -0.58086300 | 6.19280900  | -1.93981100 |
| H | -2.12566500 | 2.36427200  | -3.11947800 |
| H | -2.23238800 | 4.84406800  | -3.21404300 |
| C | -2.53422900 | -1.32595400 | 0.21330100  |
| C | -2.57258300 | -2.31339100 | 1.20149000  |
| C | -3.19650300 | -1.46799200 | -1.00865900 |
| C | -3.30463700 | -3.47222300 | 0.93943000  |

|   |             |             |             |
|---|-------------|-------------|-------------|
| C | -3.91977600 | -2.63806300 | -1.22711400 |
| C | -3.98704900 | -3.64790500 | -0.26438500 |
| H | -3.34518100 | -4.25243500 | 1.69595000  |
| H | -4.43996400 | -2.76765100 | -2.17342500 |
| C | -1.83791000 | -2.12060600 | 2.50215800  |
| H | -0.76090800 | -2.01543000 | 2.33210500  |
| H | -2.17826500 | -1.21156300 | 3.00752200  |
| H | -1.99915900 | -2.97002200 | 3.16816800  |
| C | -4.80331500 | -4.89017800 | -0.51447800 |
| H | -4.74416000 | -5.19762800 | -1.56142800 |
| H | -4.46251900 | -5.72024400 | 0.10826200  |
| H | -5.85866800 | -4.71276500 | -0.28335300 |
| C | -3.07679000 | -0.40019700 | -2.05959900 |
| H | -3.25066900 | 0.59170700  | -1.63324200 |
| H | -2.06112600 | -0.41016500 | -2.47089300 |
| H | -3.78609000 | -0.56911800 | -2.87223700 |
| C | 0.45630500  | -0.81308500 | -0.21035800 |
| O | -0.08604900 | -1.62034400 | -1.20660100 |
| H | -0.11434000 | -2.53444400 | -0.89040900 |
| C | 1.86457600  | -0.88479800 | 0.03043400  |
| C | 2.72570800  | -1.65043200 | -0.67953800 |
| H | 2.23781400  | -0.31826600 | 0.87947000  |
| H | 2.32836800  | -2.22060900 | -1.51575100 |
| C | 4.15934300  | -1.79190000 | -0.43165500 |
| C | 4.90174200  | -2.68426700 | -1.22298600 |
| C | 4.85364800  | -1.07543900 | 0.55994100  |
| C | 6.26780000  | -2.85955500 | -1.03385500 |
| H | 4.38803500  | -3.24710900 | -1.99802400 |
| C | 6.21778100  | -1.25108600 | 0.75032200  |
| H | 4.32284100  | -0.36632700 | 1.18874200  |
| C | 6.93685600  | -2.14465900 | -0.04365700 |
| H | 6.81155600  | -3.55793000 | -1.66276800 |
| H | 6.72673800  | -0.68386200 | 1.52393000  |
| H | 8.00289200  | -2.27835800 | 0.10739500  |

#### Si-TS1

|   |             |            |             |
|---|-------------|------------|-------------|
| C | -2.47695500 | 1.51996200 | 0.38500700  |
| C | -3.86424000 | 2.05542300 | 0.51980600  |
| C | -4.35524200 | 1.49808400 | -1.69670000 |
| C | -3.08799400 | 0.60171900 | -1.85484900 |
| C | -0.80092400 | 0.62695600 | -0.77174200 |
| H | -4.55831400 | 1.26959600 | 0.85363600  |
| H | -5.20410400 | 0.86610700 | -1.40930800 |
| H | -2.58964800 | 0.82575400 | -2.80093200 |

|   |             |             |             |
|---|-------------|-------------|-------------|
| N | -1.45443200 | 1.62418700  | 1.17763500  |
| N | -0.43904600 | 1.05181500  | 0.44427900  |
| N | -2.12603500 | 0.92563600  | -0.79919400 |
| H | -4.58344100 | 1.97177500  | -2.65233400 |
| H | -3.88601000 | 2.88593200  | 1.22531100  |
| O | -4.22264600 | 2.54713800  | -0.75910800 |
| C | -3.45152300 | -0.90253400 | -1.82602300 |
| H | -4.17778500 | -1.07502300 | -2.62837100 |
| H | -2.55043000 | -1.48503800 | -2.04239800 |
| C | -4.01338000 | -1.33662200 | -0.49339000 |
| C | -5.38990600 | -1.41431000 | -0.26029600 |
| C | -3.13581600 | -1.62630000 | 0.55852000  |
| C | -5.88251600 | -1.73147700 | 1.00412500  |
| H | -6.08422000 | -1.23253000 | -1.07748000 |
| C | -3.62635200 | -1.93698900 | 1.82352900  |
| H | -2.06642500 | -1.62799800 | 0.35845500  |
| C | -5.00075000 | -1.98009000 | 2.05284700  |
| H | -6.95406900 | -1.78692700 | 1.16754300  |
| H | -2.93313200 | -2.15749300 | 2.62985200  |
| H | -5.38248500 | -2.22295900 | 3.03927700  |
| C | 0.88828900  | 0.98573700  | 0.98497100  |
| C | 1.24484300  | -0.12882200 | 1.74438200  |
| C | 1.78406600  | 2.00582800  | 0.66526700  |
| C | 2.56519000  | -0.21187800 | 2.17972800  |
| C | 3.09467600  | 1.87961200  | 1.12326600  |
| C | 3.50426400  | 0.77154600  | 1.86426000  |
| H | 2.87591800  | -1.08075500 | 2.75548000  |
| H | 3.81828800  | 2.65207900  | 0.87340600  |
| C | 0.25523400  | -1.23294000 | 1.99473900  |
| H | -0.70215300 | -0.83353600 | 2.34464300  |
| H | 0.07234800  | -1.77435800 | 1.05735400  |
| H | 0.63676800  | -1.93261000 | 2.74081400  |
| C | 4.94645900  | 0.59718600  | 2.25671500  |
| H | 5.03799400  | 0.17705800  | 3.26167000  |
| H | 5.43566700  | -0.09104600 | 1.55808700  |
| H | 5.48645000  | 1.54621600  | 2.22596300  |
| C | 1.34701800  | 3.17760700  | -0.17281300 |
| H | 1.08973700  | 2.85587900  | -1.18791200 |
| H | 0.45746600  | 3.65380100  | 0.24984200  |
| H | 2.14167700  | 3.92254100  | -0.24000000 |
| C | 0.01197100  | -0.92892700 | -1.80010500 |
| O | -0.40255400 | -1.95781800 | -1.22561600 |
| H | -0.47483500 | -0.59597400 | -2.74139800 |
| C | 1.45361600  | -0.51818800 | -1.74414700 |

|   |            |             |             |
|---|------------|-------------|-------------|
| C | 2.36866400 | -1.30572600 | -1.17307000 |
| H | 1.70610800 | 0.42553400  | -2.22500200 |
| H | 2.00640200 | -2.23783100 | -0.74036200 |
| C | 3.81571100 | -1.05937000 | -1.08025200 |
| C | 4.64892600 | -2.08233500 | -0.61065800 |
| C | 4.40667300 | 0.15824900  | -1.44965400 |
| C | 6.02936200 | -1.91138400 | -0.53820700 |
| H | 4.20355000 | -3.02740200 | -0.31146600 |
| C | 5.78222700 | 0.33406300  | -1.37241700 |
| H | 3.77947900 | 0.97937800  | -1.78403100 |
| C | 6.60250800 | -0.70302400 | -0.92444200 |
| H | 6.65550400 | -2.72264800 | -0.18036400 |
| H | 6.21990300 | 1.28436500  | -1.66225700 |
| H | 7.67740200 | -0.56425000 | -0.86934600 |

**Si-M1**

|   |            |             |             |
|---|------------|-------------|-------------|
| C | 2.43552000 | -1.50592800 | 0.53066700  |
| C | 3.79216000 | -2.11528200 | 0.66856400  |
| C | 4.27737100 | -1.67323200 | -1.56556300 |
| C | 3.02591600 | -0.77693500 | -1.79740400 |
| C | 0.79445000 | -0.59061500 | -0.59955700 |
| H | 4.53224500 | -1.35483000 | 0.95820500  |
| H | 5.12222700 | -1.03789400 | -1.27645000 |
| H | 2.49546400 | -1.10446500 | -2.69422000 |
| N | 1.43415600 | -1.50081100 | 1.35771000  |
| N | 0.42357600 | -0.91728900 | 0.64055000  |
| N | 2.08984100 | -0.96325500 | -0.67794400 |
| H | 4.52537000 | -2.18325100 | -2.49712300 |
| H | 3.77410200 | -2.91121500 | 1.41286500  |
| O | 4.10330400 | -2.68082300 | -0.58965500 |
| C | 3.40877000 | 0.71362300  | -1.95102000 |
| H | 4.11510400 | 0.77484700  | -2.78670800 |
| H | 2.49988000 | 1.27184600  | -2.20112900 |
| C | 4.01207800 | 1.28704300  | -0.68975900 |
| C | 5.39409000 | 1.34273300  | -0.48289500 |
| C | 3.15839700 | 1.74655800  | 0.32109100  |
| C | 5.91543900 | 1.80746300  | 0.72316200  |
| H | 6.07074700 | 1.03135700  | -1.27566700 |
| C | 3.67975800 | 2.20650300  | 1.52745000  |
| H | 2.08827500 | 1.76272100  | 0.11527100  |
| C | 5.05789000 | 2.22835500  | 1.73647800  |
| H | 6.99055300 | 1.84526200  | 0.86761400  |
| H | 3.00739700 | 2.56221600  | 2.30278200  |
| H | 5.46249100 | 2.58824900  | 2.67710800  |

|   |             |             |             |
|---|-------------|-------------|-------------|
| C | -0.88701400 | -0.75216700 | 1.20771900  |
| C | -1.22208500 | 0.48264100  | 1.76043800  |
| C | -1.78900100 | -1.80978300 | 1.08019300  |
| C | -2.54671500 | 0.65914200  | 2.15613100  |
| C | -3.09968100 | -1.58391800 | 1.49133800  |
| C | -3.50003700 | -0.34745900 | 2.00105300  |
| H | -2.84824700 | 1.62120800  | 2.56324700  |
| H | -3.83273400 | -2.37933400 | 1.38048100  |
| C | -0.21766800 | 1.59812300  | 1.82299200  |
| H | 0.73005700  | 1.25167400  | 2.24916100  |
| H | -0.01997400 | 1.94750300  | 0.79998500  |
| H | -0.59397300 | 2.42280700  | 2.43094200  |
| C | -4.94860200 | -0.07893500 | 2.30453300  |
| H | -5.48350200 | -0.99881800 | 2.55163700  |
| H | -5.05989800 | 0.62386700  | 3.13367700  |
| H | -5.42723100 | 0.36163200  | 1.42180200  |
| C | -1.36054800 | -3.12232600 | 0.48007800  |
| H | -1.05656100 | -2.99751000 | -0.56552200 |
| H | -0.50542800 | -3.54166700 | 1.01793700  |
| H | -2.17804300 | -3.84430900 | 0.51021800  |
| C | 0.06862600  | 0.30886200  | -1.62981100 |
| O | 0.42935300  | 1.55799500  | -1.34052200 |
| H | 0.44706100  | -0.08370600 | -2.61288900 |
| C | -1.42325600 | -0.00897100 | -1.62770000 |
| C | -2.31903800 | 0.93894200  | -1.35325200 |
| H | -1.71471200 | -1.03063600 | -1.87688100 |
| H | -1.91037500 | 1.92583800  | -1.13825200 |
| C | -3.78198900 | 0.78985100  | -1.29245100 |
| C | -4.57109000 | 1.92540400  | -1.06965400 |
| C | -4.43236500 | -0.44610200 | -1.43119900 |
| C | -5.96008000 | 1.83991600  | -1.00853800 |
| H | -4.08162600 | 2.88835000  | -0.95074300 |
| C | -5.81717000 | -0.53560100 | -1.36808700 |
| H | -3.84483900 | -1.34801900 | -1.57707500 |
| C | -6.59047200 | 0.60838300  | -1.16233000 |
| H | -6.54867500 | 2.73671500  | -0.84173500 |
| H | -6.29903900 | -1.50225500 | -1.47915200 |
| H | -7.67230300 | 0.53618600  | -1.11617000 |

**Si-M02**

|   |             |            |            |
|---|-------------|------------|------------|
| C | -3.36735900 | 0.79183400 | 1.70720800 |
| C | -4.48620200 | 1.72868100 | 2.03140400 |
| C | -3.14873100 | 3.56971900 | 1.58585000 |
| C | -1.98010700 | 2.74690400 | 0.96858000 |

|   |             |             |             |
|---|-------------|-------------|-------------|
| C | -1.31246900 | 0.27408300  | 1.20277000  |
| H | -5.07046600 | 1.96224500  | 1.12962400  |
| H | -3.82926600 | 3.88614900  | 0.78684900  |
| H | -1.02706900 | 3.03411400  | 1.40578000  |
| N | -3.30471700 | -0.49695800 | 1.86211600  |
| N | -2.01954100 | -0.80464400 | 1.53366700  |
| N | -2.16149400 | 1.31291000  | 1.30454000  |
| H | -2.73402000 | 4.45716600  | 2.06459900  |
| H | -5.13564200 | 1.28135100  | 2.78358700  |
| O | -3.88610300 | 2.88375600  | 2.57453500  |
| C | -1.91055500 | 2.92821400  | -0.56219900 |
| H | -1.83895500 | 4.00533300  | -0.74821800 |
| H | -0.97662400 | 2.47475500  | -0.90239800 |
| C | -3.09441400 | 2.33885400  | -1.29154100 |
| C | -4.19886000 | 3.11880800  | -1.64867500 |
| C | -3.11617900 | 0.97307000  | -1.59828700 |
| C | -5.30996400 | 2.54422300  | -2.26247200 |
| H | -4.18550500 | 4.18953800  | -1.46025500 |
| C | -4.22394800 | 0.39551800  | -2.21167600 |
| H | -2.24078100 | 0.36409700  | -1.37865900 |
| C | -5.32911500 | 1.17937400  | -2.53650600 |
| H | -6.15622800 | 3.16653600  | -2.53379700 |
| H | -4.21833600 | -0.66346700 | -2.45076000 |
| H | -6.19253400 | 0.73181600  | -3.01705900 |
| C | -1.54824400 | -2.16339700 | 1.60693400  |
| C | -1.80197800 | -3.01155200 | 0.52440800  |
| C | -0.87656900 | -2.56558700 | 2.76394900  |
| C | -1.30474400 | -4.31002100 | 0.60969700  |
| C | -0.40023700 | -3.87510800 | 2.79584500  |
| C | -0.59841800 | -4.75485400 | 1.73041600  |
| H | -1.48097700 | -4.99426500 | -0.21633800 |
| H | 0.12952900  | -4.21850100 | 3.68016400  |
| C | -2.55437000 | -2.53486000 | -0.68965100 |
| H | -3.41331500 | -1.91863300 | -0.41021900 |
| H | -1.90954900 | -1.93243900 | -1.34283000 |
| H | -2.91395700 | -3.38526300 | -1.27092300 |
| C | -0.10038100 | -6.17361000 | 1.80682500  |
| H | 0.79296500  | -6.24581600 | 2.43035300  |
| H | -0.86554000 | -6.82148500 | 2.24578300  |
| H | 0.13456800  | -6.56402700 | 0.81475300  |
| C | -0.69766200 | -1.63207200 | 3.93306100  |
| H | 0.03980200  | -0.84908400 | 3.72586500  |
| H | -1.64051800 | -1.14053700 | 4.18834500  |
| H | -0.35232700 | -2.18378800 | 4.80801200  |



|   |            |             |             |
|---|------------|-------------|-------------|
| C | 0.15425700 | 0.26369400  | 0.81443900  |
| O | 0.57087600 | 1.57799700  | 0.69514000  |
| C | 0.35243700 | -0.57101600 | -0.43876100 |
| C | 0.66160800 | -0.02861000 | -1.61913100 |
| H | 0.27800200 | -1.64710800 | -0.30746000 |
| H | 0.76790100 | 1.05500300  | -1.67289800 |
| C | 0.91033900 | -0.76172600 | -2.87116800 |
| C | 1.36719800 | -0.04682300 | -3.98450400 |
| C | 0.71226200 | -2.14516500 | -2.99570800 |
| C | 1.62585300 | -0.69119300 | -5.19042400 |
| H | 1.52017600 | 1.02572800  | -3.89915700 |
| C | 0.96849400 | -2.78787000 | -4.19943900 |
| H | 0.35390500 | -2.72590600 | -2.14951900 |
| C | 1.42706300 | -2.06393900 | -5.30074600 |
| H | 1.98042100 | -0.12081200 | -6.04240600 |
| H | 0.81048400 | -3.85812000 | -4.28236600 |
| H | 1.62511100 | -2.56989900 | -6.23968900 |
| H | 1.59162300 | 1.54655700  | 0.57800200  |
| C | 3.85472200 | 1.93627300  | 1.54643800  |
| C | 5.22999200 | 1.92387300  | 1.64673000  |
| C | 5.99433000 | 1.30492400  | 0.62789000  |
| C | 5.26281300 | 0.72926400  | -0.43933400 |
| C | 3.88510700 | 0.79948000  | -0.43492500 |
| N | 3.16740800 | 1.39105100  | 0.53185300  |
| H | 3.25995100 | 2.41144100  | 2.32253200  |
| H | 5.69992900 | 2.38941200  | 2.50256000  |
| H | 5.76005900 | 0.23395700  | -1.26244000 |
| H | 3.31850200 | 0.35665800  | -1.25065100 |
| N | 7.34801200 | 1.26597900  | 0.67275100  |
| C | 8.09076200 | 0.62502900  | -0.39934000 |
| H | 7.90818700 | 1.11731800  | -1.36091500 |
| H | 9.15508000 | 0.68648100  | -0.18044200 |
| H | 7.82029000 | -0.43236500 | -0.49208000 |
| C | 8.05295400 | 1.88589400  | 1.78199100  |
| H | 7.78233400 | 1.41946900  | 2.73568500  |
| H | 9.12443100 | 1.76485200  | 1.63497000  |
| H | 7.83324300 | 2.95747600  | 1.84345000  |
| H | 0.67116800 | -0.26018600 | 1.63898600  |

**Si-TS2**

|   |             |             |             |
|---|-------------|-------------|-------------|
| C | -2.09775100 | -2.96820700 | -1.14224900 |
| C | -3.22668000 | -3.95071200 | -1.25521800 |
| C | -4.57916600 | -2.44571700 | -0.12382400 |
| C | -3.49746500 | -1.43437700 | 0.28980300  |

|   |             |             |             |
|---|-------------|-------------|-------------|
| C | -1.03164200 | -1.22338200 | -0.33615500 |
| H | -3.76060800 | -3.80911100 | -2.20535300 |
| H | -4.98192400 | -2.17358500 | -1.11250200 |
| H | -3.34873200 | -1.44727600 | 1.37073500  |
| N | -0.92459400 | -3.02276200 | -1.69244800 |
| N | -0.27190200 | -1.92653300 | -1.19382800 |
| N | -2.22512800 | -1.86781400 | -0.32709400 |
| H | -5.39367900 | -2.41065100 | 0.60037400  |
| H | -2.83284800 | -4.96748600 | -1.22008900 |
| O | -4.08651800 | -3.76970100 | -0.15531800 |
| C | -3.87589600 | -0.01947900 | -0.16880900 |
| H | -3.03451600 | 0.65773200  | -0.00507500 |
| H | -4.08673300 | -0.04324900 | -1.24391500 |
| C | -5.07707700 | 0.47328400  | 0.60314900  |
| C | -4.90474600 | 0.93065800  | 1.91300200  |
| C | -6.36007800 | 0.45063800  | 0.05525200  |
| C | -5.99736300 | 1.35484000  | 2.66207600  |
| H | -3.89992500 | 0.96089200  | 2.32885300  |
| C | -7.45558300 | 0.87614300  | 0.80382500  |
| H | -6.50280600 | 0.10671500  | -0.96637400 |
| C | -7.27633100 | 1.32667600  | 2.10856200  |
| H | -5.85207900 | 1.71464300  | 3.67569200  |
| H | -8.44822300 | 0.85825400  | 0.36556700  |
| H | -8.12933000 | 1.65910200  | 2.69099800  |
| C | 1.13330300  | -1.74369000 | -1.42006400 |
| C | 1.57512600  | -0.91204200 | -2.45047600 |
| C | 2.00615900  | -2.42477000 | -0.56332200 |
| C | 2.95279800  | -0.70227900 | -2.55263200 |
| C | 3.36930100  | -2.19882500 | -0.71740500 |
| C | 3.85675400  | -1.32376900 | -1.69157000 |
| H | 3.32445600  | -0.03827600 | -3.32959400 |
| H | 4.06631600  | -2.69665100 | -0.04748400 |
| C | 0.63018400  | -0.30535600 | -3.45531000 |
| H | 0.95748800  | 0.69569000  | -3.74654300 |
| H | 0.61038000  | -0.92181200 | -4.35921400 |
| H | -0.39381600 | -0.24089900 | -3.08223400 |
| C | 5.33574700  | -1.06549700 | -1.80650600 |
| H | 5.79493800  | -1.74537400 | -2.53095100 |
| H | 5.53246800  | -0.04364300 | -2.14137700 |
| H | 5.83264800  | -1.22098500 | -0.84419700 |
| C | 1.46946000  | -3.35242400 | 0.49291300  |
| H | 0.72871600  | -2.84870600 | 1.12589700  |
| H | 0.97035600  | -4.21205800 | 0.03554900  |
| H | 2.27523900  | -3.71861800 | 1.13145800  |

|   |             |             |             |
|---|-------------|-------------|-------------|
| C | -0.60236900 | -0.08445800 | 0.47380000  |
| O | -1.46642100 | 0.10863600  | 1.58202800  |
| H | 0.81722600  | -0.18276000 | 0.99663500  |
| C | -0.35474400 | 1.15219500  | -0.29108800 |
| C | -0.55133900 | 2.39297300  | 0.18167400  |
| H | 0.08972700  | 1.01039500  | -1.27461300 |
| H | -1.02828400 | 2.50464800  | 1.15277100  |
| C | -0.17721800 | 3.63089100  | -0.51752900 |
| C | -0.69486100 | 4.85284700  | -0.06682000 |
| C | 0.69981200  | 3.65141100  | -1.61342200 |
| C | -0.36830300 | 6.04869700  | -0.69697800 |
| H | -1.36796900 | 4.85700000  | 0.78618200  |
| C | 1.02541300  | 4.84533700  | -2.24544800 |
| H | 1.14161300  | 2.72486000  | -1.97374300 |
| C | 0.49190500  | 6.05086400  | -1.79190400 |
| H | -0.78593700 | 6.98133000  | -0.33115000 |
| H | 1.70379700  | 4.83766000  | -3.09290400 |
| H | 0.74938100  | 6.98221000  | -2.28511900 |
| C | 2.51605600  | -0.81820600 | 2.32008900  |
| C | 3.86305600  | -0.82449300 | 2.58544800  |
| C | 4.72647800  | 0.03333500  | 1.84990200  |
| C | 4.10974800  | 0.88772200  | 0.89845400  |
| C | 2.75313000  | 0.81644700  | 0.69813300  |
| N | 1.96182800  | -0.02324800 | 1.38919100  |
| H | 1.83663400  | -1.47100300 | 2.85986800  |
| H | 4.24149100  | -1.48531800 | 3.35282400  |
| H | 4.68517500  | 1.59064900  | 0.31192900  |
| H | 2.25714500  | 1.44389800  | -0.03520100 |
| N | 6.05974900  | 0.03436100  | 2.04418200  |
| C | 6.89970300  | 0.97796900  | 1.31792100  |
| H | 6.63196500  | 2.01278800  | 1.55566000  |
| H | 7.93798300  | 0.81588900  | 1.59903700  |
| H | 6.81061700  | 0.82938300  | 0.23681300  |
| C | 6.65220100  | -0.83677500 | 3.05065400  |
| H | 6.41747900  | -1.88577900 | 2.84520000  |
| H | 7.73355900  | -0.71971300 | 3.02662900  |
| H | 6.29796100  | -0.58415200 | 4.05588300  |
| H | -0.99986200 | -0.15695000 | 2.38181400  |

**Si-M2**

|   |             |             |            |
|---|-------------|-------------|------------|
| C | -2.59171400 | -1.24920000 | 0.86582100 |
| C | -4.02075200 | -1.57175100 | 1.16806600 |
| C | -4.39093700 | 0.58355900  | 1.91950100 |
| C | -2.97898400 | 1.11789300  | 1.55926200 |

|   |             |             |             |
|---|-------------|-------------|-------------|
| C | -0.76002000 | 0.01650900  | 0.88193700  |
| H | -4.65415100 | -1.36312200 | 0.29219400  |
| H | -5.07140500 | 0.74440100  | 1.07300900  |
| H | -2.53709200 | 1.61769200  | 2.42021600  |
| N | -1.69779600 | -2.01438500 | 0.34723000  |
| N | -0.55174000 | -1.22705200 | 0.31226500  |
| N | -2.10844600 | -0.01092100 | 1.22237000  |
| H | -4.77102300 | 1.13760500  | 2.77916600  |
| H | -4.11786100 | -2.62367500 | 1.43832300  |
| O | -4.41489300 | -0.78433400 | 2.27125500  |
| C | -3.05695400 | 2.13946900  | 0.40005700  |
| H | -3.74738400 | 2.93060300  | 0.71508300  |
| H | -2.07061200 | 2.59669800  | 0.28881700  |
| C | -3.51587100 | 1.53670600  | -0.90610300 |
| C | -4.84527600 | 1.63985900  | -1.32797600 |
| C | -2.61536600 | 0.83283500  | -1.71470200 |
| C | -5.27268700 | 1.03692400  | -2.50887600 |
| H | -5.55251000 | 2.20798400  | -0.72811900 |
| C | -3.03870800 | 0.22749600  | -2.89425100 |
| H | -1.56972100 | 0.77553800  | -1.42103900 |
| C | -4.37085500 | 0.32199700  | -3.29196100 |
| H | -6.30880100 | 1.13078000  | -2.81806500 |
| H | -2.32394900 | -0.31015600 | -3.50986100 |
| H | -4.70043600 | -0.14861400 | -4.21248400 |
| C | 0.69957100  | -1.85896400 | 0.05501700  |
| C | 1.49240900  | -2.27074200 | 1.13337100  |
| C | 1.10655300  | -2.01978400 | -1.27151900 |
| C | 2.73972800  | -2.82261000 | 0.85146700  |
| C | 2.35894200  | -2.58675200 | -1.50914700 |
| C | 3.19198300  | -2.98018300 | -0.46143100 |
| H | 3.37417900  | -3.14047100 | 1.67573200  |
| H | 2.69444600  | -2.71359700 | -2.53549200 |
| C | 1.01306100  | -2.08547500 | 2.54707300  |
| H | 1.06159200  | -1.02861900 | 2.83153200  |
| H | -0.02753600 | -2.40630800 | 2.65174500  |
| H | 1.62875500  | -2.65803400 | 3.24279700  |
| C | 4.56377400  | -3.54340600 | -0.73018800 |
| H | 5.33541900  | -2.79938600 | -0.50647500 |
| H | 4.76126400  | -4.41664500 | -0.10310300 |
| H | 4.67450900  | -3.83765600 | -1.77574700 |
| C | 0.22820000  | -1.54292100 | -2.39681500 |
| H | -0.80480200 | -1.87139800 | -2.25415600 |
| H | 0.22291200  | -0.44696700 | -2.43698600 |
| H | 0.59164400  | -1.91393500 | -3.35694500 |

|   |             |            |             |
|---|-------------|------------|-------------|
| C | 0.12464900  | 1.05981900 | 1.04874100  |
| O | -0.33207300 | 2.17091200 | 1.76261200  |
| H | 0.19370600  | 2.22820300 | 2.57222300  |
| C | 1.46424000  | 1.09345800 | 0.54539400  |
| C | 2.33045300  | 2.11917400 | 0.71426700  |
| H | 1.79518200  | 0.22782700 | -0.01799600 |
| H | 1.99194900  | 3.02301900 | 1.21600300  |
| C | 3.70887600  | 2.12782800 | 0.22403700  |
| C | 4.42719600  | 3.33446700 | 0.20410300  |
| C | 4.36885200  | 0.97007700 | -0.22869400 |
| C | 5.73478700  | 3.39245500 | -0.26495700 |
| H | 3.93966300  | 4.23985100 | 0.55660200  |
| C | 5.67272600  | 1.03042500 | -0.70315000 |
| H | 3.86272500  | 0.00822800 | -0.19215100 |
| C | 6.36627900  | 2.24056600 | -0.72745400 |
| H | 6.26169900  | 4.34190100 | -0.27112600 |
| H | 6.15772600  | 0.12197000 | -1.04862800 |
| H | 7.38657800  | 2.28179500 | -1.09440100 |

**Si-TS3**

|   |            |             |             |
|---|------------|-------------|-------------|
| C | 5.04655500 | 0.91302300  | 0.98564200  |
| C | 6.28507700 | 0.52793900  | 1.72399200  |
| C | 5.68341200 | -1.72546200 | 1.67554800  |
| C | 4.63086300 | -1.50286700 | 0.54130800  |
| C | 3.09558500 | 0.51703100  | 0.05279200  |
| H | 7.10998800 | 0.30665100  | 1.03151100  |
| H | 6.62592300 | -2.05612000 | 1.22153500  |
| H | 3.73363900 | -2.07998000 | 0.75988600  |
| N | 4.51794800 | 2.08807200  | 0.83717200  |
| N | 3.31674100 | 1.84266100  | 0.23284000  |
| N | 4.23158700 | -0.08168500 | 0.51634200  |
| H | 5.32091400 | -2.50926300 | 2.34157100  |
| H | 6.57709400 | 1.33225400  | 2.39889900  |
| O | 5.93196600 | -0.60237400 | 2.49471300  |
| C | 5.17302300 | -1.94931600 | -0.83565800 |
| H | 5.47617100 | -2.99668100 | -0.72967900 |
| H | 4.33830200 | -1.91297600 | -1.53906100 |
| C | 6.32632200 | -1.10832200 | -1.32064400 |
| C | 7.65504500 | -1.50823100 | -1.14813800 |
| C | 6.07640700 | 0.13397100  | -1.91429600 |
| C | 8.70576300 | -0.67259000 | -1.52158900 |
| H | 7.86962900 | -2.48554900 | -0.72293400 |
| C | 7.12152000 | 0.97505400  | -2.28315500 |
| H | 5.04618600 | 0.43471400  | -2.09244900 |

|   |             |             |             |
|---|-------------|-------------|-------------|
| C | 8.44122700  | 0.57642200  | -2.07788600 |
| H | 9.73074900  | -0.99941200 | -1.37974700 |
| H | 6.90747400  | 1.93747100  | -2.73744900 |
| H | 9.25862800  | 1.22955600  | -2.36481300 |
| C | 2.47976800  | 2.95248300  | -0.12810400 |
| C | 1.85512500  | 3.66921300  | 0.89494400  |
| C | 2.30445700  | 3.25208100  | -1.48477200 |
| C | 0.98237300  | 4.69322600  | 0.52000700  |
| C | 1.41832200  | 4.27550800  | -1.80440500 |
| C | 0.73867000  | 4.99696400  | -0.81853100 |
| H | 0.47274200  | 5.25580600  | 1.29780000  |
| H | 1.25037500  | 4.51522900  | -2.85137300 |
| C | 2.10760400  | 3.35204500  | 2.34429700  |
| H | 2.04342500  | 2.27766800  | 2.53917000  |
| H | 3.11164600  | 3.67074400  | 2.63859000  |
| H | 1.38116600  | 3.86161100  | 2.97871900  |
| C | -0.24500800 | 6.06764100  | -1.21068500 |
| H | -1.06969200 | 5.63429500  | -1.78482100 |
| H | -0.66246800 | 6.56577800  | -0.33379600 |
| H | 0.23040400  | 6.82377700  | -1.84166100 |
| C | 3.03675900  | 2.49165400  | -2.55601500 |
| H | 4.10931900  | 2.46016900  | -2.33966500 |
| H | 2.67327600  | 1.46070100  | -2.63104400 |
| H | 2.89699200  | 2.97025400  | -3.52603000 |
| C | 1.94078800  | -0.16643500 | -0.50181000 |
| O | 2.16318500  | -1.39711300 | -0.92054500 |
| H | 1.86375500  | -2.21094400 | -0.13909400 |
| C | 0.72050900  | 0.51588300  | -0.60758400 |
| C | -0.40034900 | 0.05273300  | -1.27053300 |
| H | 0.66594600  | 1.48834600  | -0.13488700 |
| H | -0.35271000 | -0.93091400 | -1.72996200 |
| C | -1.59739200 | 0.81420100  | -1.46896500 |
| C | -2.68571400 | 0.21936700  | -2.14321100 |
| C | -1.75901800 | 2.15093100  | -1.02121500 |
| C | -3.86165800 | 0.91797200  | -2.38316000 |
| H | -2.58299900 | -0.80648200 | -2.48955200 |
| C | -2.93696000 | 2.83358800  | -1.24623400 |
| H | -0.94571400 | 2.65906800  | -0.51010800 |
| C | -4.00708300 | 2.21837900  | -1.91686600 |
| H | -4.68202000 | 0.43063800  | -2.89902100 |
| H | -3.03710900 | 3.85614200  | -0.89240500 |
| H | -4.93485300 | 2.75730500  | -2.07999200 |
| C | -0.67809200 | -3.23612600 | -0.13509800 |
| C | -1.92219000 | -2.65307500 | -0.24029300 |

|   |             |             |             |
|---|-------------|-------------|-------------|
| C | -2.36189400 | -1.60921600 | 0.61707800  |
| C | -1.51175800 | -1.28273100 | 1.70654200  |
| C | -0.26830800 | -1.84978200 | 1.88334400  |
| C | 0.22384800  | -2.71444400 | 0.85067200  |
| H | -2.58169300 | -2.96940600 | -1.03849200 |
| H | -1.89281600 | -0.60293200 | 2.45781300  |
| C | -3.61935200 | -0.95210200 | 0.41827600  |
| C | -3.89516800 | 0.30537600  | 1.03370700  |
| C | -4.67386000 | -1.55432500 | -0.34326500 |
| C | -5.09486300 | 0.94919800  | 0.92729500  |
| H | -3.08826500 | 0.77837100  | 1.57999600  |
| C | -5.90205300 | -0.98618600 | -0.50046700 |
| H | -4.48977900 | -2.53222700 | -0.77105500 |
| C | -6.17823700 | 0.32061000  | 0.13921600  |
| C | 0.56495000  | -1.58470300 | 3.14521200  |
| C | 1.80021300  | -0.72711500 | 2.83210000  |
| C | -0.25077500 | -0.84564500 | 4.21431400  |
| C | 1.01669700  | -2.92896500 | 3.74409000  |
| H | 2.47550300  | -1.26112400 | 2.16458000  |
| H | 1.49413500  | 0.20610600  | 2.34752400  |
| H | 2.34047400  | -0.48325100 | 3.75428200  |
| H | -1.16776900 | -1.38628700 | 4.46795200  |
| H | 0.35110200  | -0.75457700 | 5.12347600  |
| H | -0.52210300 | 0.16636000  | 3.89579000  |
| H | 1.60735600  | -2.75315900 | 4.64977400  |
| H | 0.14850300  | -3.53726400 | 4.01646300  |
| H | 1.62545800  | -3.48789600 | 3.03140700  |
| C | -0.25080700 | -4.39621300 | -1.04740400 |
| C | 0.89207700  | -4.01020100 | -2.00505000 |
| C | 0.20381000  | -5.57343200 | -0.16487800 |
| C | -1.42353700 | -4.88387100 | -1.90953700 |
| H | 0.65543000  | -3.09595300 | -2.55802200 |
| H | 1.82857900  | -3.85050000 | -1.47198000 |
| H | 1.04167000  | -4.81930600 | -2.72885400 |
| H | -0.61645700 | -5.91420200 | 0.47493400  |
| H | 0.51473000  | -6.41259400 | -0.79687200 |
| H | 1.04493900  | -5.28136100 | 0.46613700  |
| H | -1.11005000 | -5.76804100 | -2.47208800 |
| H | -2.28914400 | -5.16202700 | -1.29991400 |
| H | -1.73847300 | -4.12642800 | -2.63563600 |
| C | -7.02553800 | -1.67469000 | -1.27845200 |
| C | -7.48507200 | -0.78536900 | -2.44932000 |
| C | -6.57295700 | -3.01631000 | -1.86705700 |
| C | -8.21681500 | -1.95227700 | -0.34153800 |

|   |             |             |             |
|---|-------------|-------------|-------------|
| H | -7.79076200 | 0.19904600  | -2.09612500 |
| H | -6.67987600 | -0.66991600 | -3.18316500 |
| H | -8.33215200 | -1.25744000 | -2.95961900 |
| H | -6.28646900 | -3.72859800 | -1.08638400 |
| H | -7.39943300 | -3.45675200 | -2.43290900 |
| H | -5.72693100 | -2.89364100 | -2.55227900 |
| H | -9.00502900 | -2.47688200 | -0.89307100 |
| H | -7.90402200 | -2.58969700 | 0.49206000  |
| H | -8.62295800 | -1.02350700 | 0.05793700  |
| C | -5.39736900 | 2.23662400  | 1.69986900  |
| C | -6.47218500 | 1.91906800  | 2.75953300  |
| C | -4.15513300 | 2.76471800  | 2.42781700  |
| C | -5.91213900 | 3.36580700  | 0.78817000  |
| H | -7.39787900 | 1.59328900  | 2.28369200  |
| H | -6.12333300 | 1.12957800  | 3.43310400  |
| H | -6.67796600 | 2.81350000  | 3.35825400  |
| H | -3.34124100 | 2.97486200  | 1.72471500  |
| H | -4.40949400 | 3.69675500  | 2.94212600  |
| H | -3.79058500 | 2.05809300  | 3.18083300  |
| H | -6.21135700 | 4.21968600  | 1.40667400  |
| H | -5.12223400 | 3.70390700  | 0.11257400  |
| H | -6.76967300 | 3.03810200  | 0.20217400  |
| O | -7.29429400 | 0.85706400  | 0.04097100  |
| O | 1.50877100  | -2.97484300 | 0.74859800  |

**Si-M3**

|   |            |             |             |
|---|------------|-------------|-------------|
| C | 5.11490600 | 0.89866400  | 0.99008600  |
| C | 6.31889100 | 0.50156800  | 1.78007300  |
| C | 5.66990100 | -1.74110900 | 1.74468700  |
| C | 4.65903300 | -1.51925200 | 0.57257800  |
| C | 3.19098500 | 0.52424300  | 0.03349300  |
| H | 7.16360000 | 0.25209400  | 1.12284400  |
| H | 6.62082700 | -2.09223900 | 1.32567500  |
| H | 3.73631700 | -2.06479500 | 0.76774800  |
| N | 4.60236900 | 2.08058300  | 0.80011600  |
| N | 3.41275600 | 1.83536600  | 0.19082500  |
| N | 4.29103000 | -0.08707000 | 0.52092600  |
| H | 5.27261300 | -2.50782100 | 2.41065800  |
| H | 6.60087300 | 1.31023100  | 2.45411300  |
| O | 5.90454500 | -0.60698500 | 2.55140200  |
| C | 5.23889900 | -1.99157300 | -0.77951000 |
| H | 5.55331900 | -3.03088400 | -0.63467300 |
| H | 4.42581000 | -1.98777200 | -1.50798400 |
| C | 6.39075900 | -1.14476000 | -1.25901700 |



|   |             |             |             |
|---|-------------|-------------|-------------|
| C | 7.72193500  | -1.50351500 | -1.02748300 |
| C | 6.12903000  | 0.06284300  | -1.91542700 |
| C | 8.76260200  | -0.65705300 | -1.40528400 |
| H | 7.94768300  | -2.45678400 | -0.55600800 |
| C | 7.16384500  | 0.91399200  | -2.28967700 |
| H | 5.09784700  | 0.32479300  | -2.14533700 |
| C | 8.48511700  | 0.55886400  | -2.02472000 |
| H | 9.79046200  | -0.95045100 | -1.21834100 |
| H | 6.94192000  | 1.84788500  | -2.79660200 |
| H | 9.29554400  | 1.21872900  | -2.31583300 |
| C | 2.56232800  | 2.93748100  | -0.18512600 |
| C | 1.93882400  | 3.65810400  | 0.83580400  |
| C | 2.36836900  | 3.19983100  | -1.54526200 |
| C | 1.04546300  | 4.65848100  | 0.44912100  |
| C | 1.46546900  | 4.20578000  | -1.87321100 |
| C | 0.78412300  | 4.93304500  | -0.89321400 |
| H | 0.53226900  | 5.22514200  | 1.22130700  |
| H | 1.28185600  | 4.42331600  | -2.92218600 |
| C | 2.20628300  | 3.37197200  | 2.28951800  |
| H | 2.17790500  | 2.29996600  | 2.50707400  |
| H | 3.19721300  | 3.73400000  | 2.57818100  |
| H | 1.46186800  | 3.86544300  | 2.91539300  |
| C | -0.23138000 | 5.96947900  | -1.29241700 |
| H | -1.10769200 | 5.48574000  | -1.73594100 |
| H | -0.56318600 | 6.55465800  | -0.43303000 |
| H | 0.17855300  | 6.65329700  | -2.04015200 |
| C | 3.09092500  | 2.42339300  | -2.61318300 |
| H | 4.16201800  | 2.36398700  | -2.39613400 |
| H | 2.69977300  | 1.40331400  | -2.70194900 |
| H | 2.96711800  | 2.90818100  | -3.58218600 |
| C | 2.00280400  | -0.18476300 | -0.57827500 |
| O | 2.24910400  | -1.30233500 | -1.05725500 |
| H | 1.85783800  | -2.85685200 | 0.08180300  |
| C | 0.76222200  | 0.51512700  | -0.56926100 |
| C | -0.31721500 | 0.08726500  | -1.29655500 |
| H | 0.70129500  | 1.42982300  | 0.00565100  |
| H | -0.22510600 | -0.86097300 | -1.82379600 |
| C | -1.54602800 | 0.81314500  | -1.46198100 |
| C | -2.61365900 | 0.20172200  | -2.14543100 |
| C | -1.73044700 | 2.12444700  | -0.96724700 |
| C | -3.81996700 | 0.86149300  | -2.32945300 |
| H | -2.48369200 | -0.81024100 | -2.52092300 |
| C | -2.93409700 | 2.77635800  | -1.14852300 |
| H | -0.91809300 | 2.63705900  | -0.45864400 |

|   |             |             |             |
|---|-------------|-------------|-------------|
| C | -3.99356700 | 2.13968900  | -1.81279400 |
| H | -4.64331100 | 0.35869000  | -2.82365000 |
| H | -3.06555200 | 3.78104400  | -0.75747700 |
| H | -4.94939200 | 2.64125300  | -1.92493900 |
| C | -0.66817000 | -3.14839500 | -0.15423800 |
| C | -1.92359400 | -2.55146200 | -0.26667300 |
| C | -2.40994100 | -1.60482300 | 0.64945300  |
| C | -1.58795000 | -1.31088400 | 1.74845900  |
| C | -0.30760100 | -1.83868300 | 1.89956900  |
| C | 0.16310700  | -2.70565000 | 0.89328300  |
| H | -2.56123100 | -2.81915100 | -1.09943600 |
| H | -1.98638100 | -0.66135800 | 2.51693000  |
| C | -3.71278900 | -0.95874200 | 0.46618900  |
| C | -3.99210300 | 0.28811700  | 1.05779500  |
| C | -4.74742700 | -1.55826000 | -0.28803300 |
| C | -5.20605600 | 0.93272000  | 0.93318000  |
| H | -3.19404300 | 0.77498500  | 1.60936300  |
| C | -5.97847600 | -0.97076600 | -0.48113100 |
| H | -4.56403300 | -2.54308200 | -0.70725400 |
| C | -6.26993200 | 0.32278600  | 0.13748500  |
| C | 0.53667300  | -1.51363500 | 3.14293800  |
| C | 1.78552700  | -0.71166500 | 2.74612100  |
| C | -0.24125200 | -0.66948300 | 4.16092000  |
| C | 0.95682700  | -2.81578900 | 3.84737000  |
| H | 2.40834800  | -1.29383100 | 2.06718400  |
| H | 1.48422600  | 0.21709400  | 2.24734500  |
| H | 2.37999500  | -0.45370500 | 3.63047900  |
| H | -1.14679400 | -1.18068500 | 4.50026600  |
| H | 0.39246900  | -0.49083700 | 5.03517800  |
| H | -0.52775100 | 0.30459300  | 3.75130700  |
| H | 1.53719100  | -2.58153600 | 4.74694400  |
| H | 0.07157600  | -3.38215800 | 4.15222800  |
| H | 1.56325000  | -3.44592100 | 3.19565200  |
| C | -0.25783200 | -4.29799100 | -1.09901800 |
| C | 0.98759000  | -3.99166000 | -1.95409600 |
| C | 0.00725000  | -5.55383700 | -0.24821200 |
| C | -1.38660300 | -4.63703400 | -2.08371500 |
| H | 0.91430400  | -3.01638900 | -2.44227300 |
| H | 1.91662200  | -4.01541300 | -1.37876800 |
| H | 1.08526600  | -4.75839800 | -2.73006900 |
| H | -0.89664500 | -5.84172200 | 0.29699100  |
| H | 0.29798100  | -6.38898900 | -0.89540100 |
| H | 0.80655100  | -5.37644300 | 0.47360200  |
| H | -1.08790300 | -5.50112500 | -2.68427900 |

|   |             |             |             |
|---|-------------|-------------|-------------|
| H | -2.31528400 | -4.89357700 | -1.56630500 |
| H | -1.58978900 | -3.80852800 | -2.77136800 |
| C | -7.08136700 | -1.66169300 | -1.28990300 |
| C | -7.51788000 | -0.76625400 | -2.46435400 |
| C | -6.61998300 | -3.00016200 | -1.87782900 |
| C | -8.29518400 | -1.94069300 | -0.38470500 |
| H | -7.81632800 | 0.21653800  | -2.09906200 |
| H | -6.69970900 | -0.65201500 | -3.18550000 |
| H | -8.36144800 | -1.22634700 | -2.99333600 |
| H | -6.35172200 | -3.71896500 | -1.09619200 |
| H | -7.43336300 | -3.43616300 | -2.46747700 |
| H | -5.75532700 | -2.87454400 | -2.53989500 |
| H | -9.09049500 | -2.43093500 | -0.95957800 |
| H | -8.00892200 | -2.60628700 | 0.43687500  |
| H | -8.67501300 | -1.00799600 | 0.03230400  |
| C | -5.50828500 | 2.22647700  | 1.69891900  |
| C | -6.61767800 | 1.93059400  | 2.72700000  |
| C | -4.28473200 | 2.74688500  | 2.46266300  |
| C | -5.98527100 | 3.35723500  | 0.76924000  |
| H | -7.51857200 | 1.59094000  | 2.21434000  |
| H | -6.29028100 | 1.15124300  | 3.42340900  |
| H | -6.85095900 | 2.83291400  | 3.30567000  |
| H | -3.44855800 | 2.95456300  | 1.78442300  |
| H | -4.54683400 | 3.67961300  | 2.97386200  |
| H | -3.94226700 | 2.03475400  | 3.22132100  |
| H | -6.32363600 | 4.21084400  | 1.36931600  |
| H | -5.16577900 | 3.70597700  | 0.13301200  |
| H | -6.80754300 | 3.01069100  | 0.14383700  |
| O | -7.39701500 | 0.87686900  | 0.00810700  |
| O | 1.48185700  | -3.13429000 | 0.93408500  |

#### Si-M4

|   |             |             |             |
|---|-------------|-------------|-------------|
| C | 1.69628100  | -0.49783800 | -1.09591600 |
| C | 2.74109100  | 0.58597400  | -1.36043800 |
| H | 1.60903300  | -0.73939600 | -0.03297400 |
| H | 2.59175700  | 1.43586300  | -0.68124200 |
| N | 0.40419500  | 0.10866000  | -1.49053300 |
| O | 2.65175300  | 1.00792500  | -2.71848900 |
| C | 0.29308100  | 1.12768500  | -2.39540100 |
| C | 1.51859500  | 1.80969900  | -2.93347600 |
| H | 1.41196400  | 1.97777100  | -4.00626300 |
| H | 1.61859400  | 2.78237800  | -2.42975500 |
| N | -0.95533600 | 1.42104900  | -2.62944400 |
| C | -0.84155700 | -0.21486300 | -1.11436000 |

|   |             |             |             |
|---|-------------|-------------|-------------|
| N | -1.65339500 | 0.56913800  | -1.82978300 |
| C | -3.08975400 | 0.52039500  | -1.89569100 |
| C | -3.70516900 | -0.66529400 | -2.31389500 |
| C | -3.80317900 | 1.66529500  | -1.52435700 |
| C | -5.09777600 | -0.70527600 | -2.27186700 |
| C | -5.19397400 | 1.56872400  | -1.50926400 |
| C | -5.85543600 | 0.38867700  | -1.85360500 |
| H | -5.60207100 | -1.61888900 | -2.57631300 |
| H | -5.77240000 | 2.43911000  | -1.21061100 |
| H | 3.74040600  | 0.17648900  | -1.21316200 |
| C | 1.95246300  | -1.76038500 | -1.93755600 |
| H | 1.03301600  | -2.34918600 | -1.96349200 |
| H | 2.19998600  | -1.44815600 | -2.95770000 |
| C | 3.06458100  | -2.58520600 | -1.33635400 |
| C | 2.75846400  | -3.59373000 | -0.41937500 |
| C | 4.40376000  | -2.33846900 | -1.64878200 |
| C | 3.77141500  | -4.34642900 | 0.16699200  |
| H | 1.71744200  | -3.77632600 | -0.16475400 |
| C | 5.42013900  | -3.07551200 | -1.04631300 |
| H | 4.65317100  | -1.56857500 | -2.37552200 |
| C | 5.10513700  | -4.08394800 | -0.13879200 |
| H | 3.51985300  | -5.13300900 | 0.87199500  |
| H | 6.45626400  | -2.86522200 | -1.29208700 |
| H | 5.89554400  | -4.66595300 | 0.32447300  |
| C | -7.35262400 | 0.28028200  | -1.74496400 |
| H | -7.76911500 | -0.30074000 | -2.57105800 |
| H | -7.62108000 | -0.23113100 | -0.81392000 |
| H | -7.82469300 | 1.26463700  | -1.73845200 |
| C | -2.93204100 | -1.86774300 | -2.79251500 |
| H | -1.98897900 | -1.58912400 | -3.27040100 |
| H | -2.70509200 | -2.55204600 | -1.96843400 |
| H | -3.52742800 | -2.41991100 | -3.52155500 |
| C | -3.10860000 | 2.95103100  | -1.17252300 |
| H | -3.78532000 | 3.61203800  | -0.62989300 |
| H | -2.22700700 | 2.78079300  | -0.54906300 |
| H | -2.77481700 | 3.46203000  | -2.08046900 |
| C | -3.22055500 | -2.14468500 | 1.00018100  |
| C | -2.49810300 | -1.10308400 | 0.57003900  |
| H | -2.80407700 | -3.14286900 | 0.86962900  |
| C | -4.54372500 | -2.04721700 | 1.62565700  |
| C | -5.04460500 | -3.13202500 | 2.35507300  |
| C | -5.33781700 | -0.89820800 | 1.48932800  |
| C | -6.29505100 | -3.06331300 | 2.96098000  |
| H | -4.44021900 | -4.02939000 | 2.45396800  |

|   |             |             |             |
|---|-------------|-------------|-------------|
| C | -6.58755300 | -0.83226900 | 2.09205100  |
| H | -4.98393000 | -0.06462500 | 0.88794200  |
| C | -7.06857300 | -1.91274300 | 2.83271700  |
| H | -6.66619100 | -3.90858200 | 3.53100400  |
| H | -7.19221600 | 0.06243300  | 1.98019500  |
| H | -8.04592600 | -1.85898200 | 3.30095600  |
| C | -1.24153600 | -1.32254300 | -0.16146300 |
| O | -0.60247100 | -2.35514900 | -0.19470100 |
| H | -2.81528400 | -0.07375200 | 0.69820100  |
| C | 4.03718800  | 0.35038300  | 1.56656100  |
| C | 4.56868700  | -0.92721600 | 1.80482400  |
| H | 5.59126200  | -1.22367000 | 1.62576900  |
| C | 3.54017700  | -1.71789900 | 2.31040300  |
| H | 3.59879700  | -2.75688700 | 2.59568700  |
| C | 2.39499000  | -0.92608200 | 2.36453000  |
| H | 1.38201400  | -1.15531900 | 2.65373900  |
| N | 2.68790500  | 0.32034300  | 1.91840100  |
| C | 4.69422000  | 1.50014800  | 1.01922000  |
| C | 1.75707000  | 1.38253900  | 1.77855400  |
| H | 2.16929700  | 2.36960600  | 1.90282400  |
| C | 0.42042600  | 1.14715900  | 1.57056200  |
| O | -0.14223000 | -0.00673900 | 1.47270400  |
| C | -0.46898500 | 2.35846900  | 1.53481300  |
| C | -0.07054300 | 3.58723700  | 0.99694000  |
| C | -1.74532500 | 2.25014700  | 2.10154100  |
| C | -0.91661700 | 4.69272300  | 1.05839200  |
| H | 0.91008700  | 3.67411000  | 0.53531500  |
| C | -2.58445700 | 3.35749000  | 2.17566500  |
| H | -2.04269500 | 1.28885000  | 2.51036500  |
| C | -2.17000000 | 4.58451900  | 1.65840800  |
| H | -0.59560300 | 5.64116000  | 0.63876700  |
| H | -3.56151500 | 3.26599800  | 2.64098200  |
| H | -2.82351000 | 5.44962000  | 1.71363000  |
| O | 4.23896400  | 2.62059500  | 0.84698000  |
| C | 6.14048800  | 1.24329900  | 0.52783300  |
| F | 6.15280900  | 0.31054300  | -0.44369800 |
| F | 6.67624700  | 2.35290700  | 0.03320700  |
| F | 6.93658700  | 0.80122600  | 1.51194500  |

**Si-M4-1**

|   |            |            |            |
|---|------------|------------|------------|
| C | 3.84799400 | 0.87318300 | 0.09469300 |
| C | 5.15357700 | 1.60575900 | 0.40320300 |
| H | 3.54922100 | 0.18605700 | 0.88855200 |
| H | 5.09112000 | 2.13237300 | 1.36558100 |

|   |             |             |             |
|---|-------------|-------------|-------------|
| N | 2.83014700  | 1.94677300  | 0.04244000  |
| O | 5.43827000  | 2.51220800  | -0.65531900 |
| C | 3.12508400  | 3.18803100  | -0.44906600 |
| C | 4.54660400  | 3.59886000  | -0.72954700 |
| H | 4.62866500  | 4.03118700  | -1.72852700 |
| H | 4.80749100  | 4.37329600  | 0.00623300  |
| N | 2.06959200  | 3.95481800  | -0.46310500 |
| C | 1.52909200  | 1.95091300  | 0.37225700  |
| N | 1.08502100  | 3.16761500  | 0.05024700  |
| C | -0.26085600 | 3.65557600  | 0.20249100  |
| C | -1.03641900 | 3.76579800  | -0.95485500 |
| C | -0.74742100 | 3.90599000  | 1.48655200  |
| C | -2.37973300 | 4.09407500  | -0.78929000 |
| C | -2.09811700 | 4.23404900  | 1.59472800  |
| C | -2.92969100 | 4.31079900  | 0.47691200  |
| H | -3.01337200 | 4.16955800  | -1.66896400 |
| H | -2.51228300 | 4.42207100  | 2.58217900  |
| H | 5.97918800  | 0.89435500  | 0.43358600  |
| C | 3.90947000  | 0.15622600  | -1.26488800 |
| H | 2.90062800  | -0.18746700 | -1.49913300 |
| H | 4.24455600  | 0.87526400  | -2.01919500 |
| C | 4.85109500  | -1.02032700 | -1.19649700 |
| C | 4.38382400  | -2.23825800 | -0.69651600 |
| C | 6.18883400  | -0.91032300 | -1.58308300 |
| C | 5.24094500  | -3.32773900 | -0.57695500 |
| H | 3.34073200  | -2.31660400 | -0.40480300 |
| C | 7.04700100  | -2.00206200 | -1.46974700 |
| H | 6.55533400  | 0.03648600  | -1.97487300 |
| C | 6.57489100  | -3.21152100 | -0.96387200 |
| H | 4.86095600  | -4.26557700 | -0.18284000 |
| H | 8.08370000  | -1.90881900 | -1.77811600 |
| H | 7.24486500  | -4.06105900 | -0.87602900 |
| C | -4.39984800 | 4.59157500  | 0.64165000  |
| H | -4.92327000 | 3.68274900  | 0.95738900  |
| H | -4.57316300 | 5.35248200  | 1.40629200  |
| H | -4.84798300 | 4.93035600  | -0.29438100 |
| C | -0.43728300 | 3.53442700  | -2.31562900 |
| H | 0.31091800  | 4.29838200  | -2.54504100 |
| H | 0.05801000  | 2.55920000  | -2.37017100 |
| H | -1.21199600 | 3.56698200  | -3.08283100 |
| C | 0.11998800  | 3.79538400  | 2.71294300  |
| H | 1.16285500  | 4.04142500  | 2.49707300  |
| H | -0.23904900 | 4.47764900  | 3.48538300  |
| H | 0.09137800  | 2.78043200  | 3.12273000  |

|   |             |             |             |
|---|-------------|-------------|-------------|
| C | -1.25363100 | -0.12636500 | 1.87916800  |
| C | -0.58537500 | 0.74175900  | 1.09822000  |
| H | -0.69373100 | -0.64997300 | 2.65363200  |
| C | -2.68831100 | -0.40606200 | 1.78625500  |
| C | -3.21685600 | -1.51649600 | 2.45597800  |
| C | -3.55644900 | 0.41937600  | 1.05617200  |
| C | -4.57285000 | -1.81248000 | 2.38112300  |
| H | -2.54755700 | -2.16187700 | 3.01831200  |
| C | -4.91128000 | 0.12367100  | 0.98338900  |
| H | -3.16992200 | 1.29773800  | 0.54396000  |
| C | -5.42298100 | -0.99694100 | 1.63874000  |
| H | -4.96333600 | -2.68952000 | 2.88640300  |
| H | -5.57024700 | 0.75987900  | 0.40152900  |
| H | -6.47989400 | -1.23300300 | 1.56566800  |
| C | 0.83486500  | 0.96221000  | 1.30158500  |
| O | 1.50474700  | 0.64988700  | 2.27739000  |
| H | -1.05377700 | 1.21261900  | 0.24058000  |
| C | -2.77901000 | -1.32097700 | -1.64833400 |
| C | -3.07483000 | -0.33525300 | -2.59555900 |
| H | -4.04122200 | -0.17793700 | -3.04965500 |
| C | -1.90369700 | 0.38734500  | -2.82703700 |
| H | -1.77054300 | 1.20745000  | -3.51645000 |
| C | -0.90998200 | -0.16595900 | -2.02413400 |
| H | 0.13738700  | 0.06431900  | -1.90881500 |
| N | -1.43154700 | -1.20118300 | -1.31161000 |
| C | -3.67878800 | -2.29273000 | -1.08082700 |
| C | -0.72385600 | -2.05272400 | -0.43563500 |
| H | -1.27670400 | -2.92281700 | -0.12540000 |
| C | 0.56078800  | -1.81341600 | -0.01137800 |
| O | 1.26189300  | -0.75637900 | -0.25433800 |
| C | 1.17137600  | -2.87507800 | 0.86018100  |
| C | 0.96912000  | -4.23818300 | 0.61627200  |
| C | 2.02204400  | -2.49899200 | 1.90590500  |
| C | 1.58841500  | -5.20129700 | 1.40902800  |
| H | 0.34440600  | -4.54296300 | -0.21771800 |
| C | 2.63827700  | -3.46092100 | 2.69956900  |
| H | 2.18155100  | -1.44101300 | 2.09183500  |
| C | 2.42521300  | -4.81669900 | 2.45383400  |
| H | 1.42595900  | -6.25455600 | 1.20107200  |
| H | 3.28849000  | -3.15291000 | 3.51299100  |
| H | 2.91158900  | -5.56757300 | 3.06882700  |
| C | -5.12618200 | -2.25567500 | -1.63867500 |
| O | -3.43259400 | -3.16355500 | -0.26612300 |
| F | -5.68789800 | -1.03624300 | -1.59049100 |

|   |             |             |             |
|---|-------------|-------------|-------------|
| F | -5.90899500 | -3.08633200 | -0.95853300 |
| F | -5.13336100 | -2.63556400 | -2.92669900 |

**Si-M4-2**

|   |             |             |             |
|---|-------------|-------------|-------------|
| C | 3.48631200  | 0.28133600  | -0.40128600 |
| C | 4.66912500  | 0.87894900  | 0.35747000  |
| H | 3.15744000  | -0.64963100 | 0.06870600  |
| H | 4.48241300  | 0.88235200  | 1.43878400  |
| N | 2.37403600  | 1.26044200  | -0.27420000 |
| O | 4.93047700  | 2.20178700  | -0.09794800 |
| C | 2.58228100  | 2.57862400  | 0.02047300  |
| C | 3.94881300  | 3.08975300  | 0.37228500  |
| H | 4.10923300  | 4.06430800  | -0.09129300 |
| H | 4.00151300  | 3.19665600  | 1.46629600  |
| N | 1.46848300  | 3.25403100  | -0.00213200 |
| C | 1.04924800  | 1.10423700  | -0.46584000 |
| N | 0.51950700  | 2.32728000  | -0.31386500 |
| C | -0.79857900 | 2.79569100  | -0.67158600 |
| C | -1.10313000 | 2.87887900  | -2.03497800 |
| C | -1.69176400 | 3.14692900  | 0.33920900  |
| C | -2.38055300 | 3.31303400  | -2.37443500 |
| C | -2.95878100 | 3.57923700  | -0.05714400 |
| C | -3.32140000 | 3.65994600  | -1.40096200 |
| H | -2.65025700 | 3.37818500  | -3.42558400 |
| H | -3.68049400 | 3.84650500  | 0.71000000  |
| H | 5.55724700  | 0.28089700  | 0.14413800  |
| C | 3.81940700  | 0.06668000  | -1.88430200 |
| H | 2.88495800  | -0.06380900 | -2.43595800 |
| H | 4.32985800  | 0.95811500  | -2.26492100 |
| C | 4.68509400  | -1.16004200 | -2.05054000 |
| C | 4.20591000  | -2.40581600 | -1.62788000 |
| C | 5.96237100  | -1.07453300 | -2.60521200 |
| C | 4.99465500  | -3.54246000 | -1.76892800 |
| H | 3.21695600  | -2.47348400 | -1.17829000 |
| C | 6.75041000  | -2.21503800 | -2.74935200 |
| H | 6.34098300  | -0.10817500 | -2.92890900 |
| C | 6.26726100  | -3.45134000 | -2.33191300 |
| H | 4.61585900  | -4.50320300 | -1.43490500 |
| H | 7.74155600  | -2.13430800 | -3.18472100 |
| H | 6.88024600  | -4.34069900 | -2.43937200 |
| C | -4.70627100 | 4.08711500  | -1.81012900 |
| H | -4.66712900 | 4.93730500  | -2.49684600 |
| H | -5.21755300 | 3.27033800  | -2.32922200 |
| H | -5.30695400 | 4.37132100  | -0.94437800 |



|   |             |             |             |
|---|-------------|-------------|-------------|
| C | -0.10639400 | 2.48094300  | -3.09151400 |
| H | 0.89793000  | 2.84868000  | -2.85919600 |
| H | -0.05556900 | 1.39001600  | -3.18849000 |
| H | -0.40061300 | 2.88459900  | -4.06133700 |
| C | -1.33165100 | 3.00998400  | 1.79255500  |
| H | -1.36509300 | 1.95416700  | 2.08477600  |
| H | -0.33296500 | 3.40687200  | 1.99461300  |
| H | -2.05008700 | 3.54601600  | 2.41446500  |
| C | -1.78963900 | -1.04823500 | -1.62487800 |
| C | -1.10065800 | -0.15482200 | -0.89719100 |
| H | -1.23149800 | -1.80652700 | -2.17201500 |
| C | -3.25074000 | -1.07908700 | -1.72584600 |
| C | -3.87892300 | -2.22174400 | -2.23593700 |
| C | -4.04324600 | 0.01549800  | -1.34338200 |
| C | -5.26315600 | -2.27424200 | -2.36119900 |
| H | -3.26950500 | -3.07370300 | -2.52509000 |
| C | -5.42475900 | -0.03778100 | -1.47313600 |
| H | -3.57480600 | 0.91881500  | -0.96173100 |
| C | -6.03904800 | -1.18081500 | -1.98493500 |
| H | -5.73596100 | -3.16778000 | -2.75598100 |
| H | -6.02584100 | 0.81506700  | -1.17304600 |
| H | -7.11875300 | -1.21852100 | -2.08820500 |
| C | 0.36209700  | -0.18020200 | -0.87789000 |
| O | 1.06547100  | -1.07201900 | -1.33668200 |
| H | -1.60780800 | 0.56007100  | -0.26118300 |
| C | -2.16092100 | -2.25123500 | 1.26589900  |
| C | -2.56503200 | -3.47946700 | 0.71586100  |
| H | -3.58425300 | -3.82831900 | 0.65400200  |
| C | -1.42866700 | -4.11047300 | 0.22395500  |
| H | -1.37498300 | -5.06782800 | -0.27277000 |
| C | -0.33779300 | -3.27997000 | 0.48921900  |
| H | 0.71555300  | -3.40366300 | 0.30586000  |
| N | -0.76989600 | -2.16825700 | 1.13686800  |
| C | -2.99561200 | -1.17219500 | 1.69088600  |
| O | -2.67521100 | -0.01487800 | 1.94029100  |
| C | -4.49296600 | -1.52977700 | 1.86951700  |
| F | -5.19700300 | -0.44803900 | 2.19210000  |
| F | -4.64147500 | -2.43231200 | 2.85168600  |
| F | -5.03938900 | -2.05468100 | 0.76314300  |
| C | 0.02880900  | -1.13113900 | 1.65568900  |
| H | -0.51322900 | -0.41674500 | 2.25322900  |
| C | 1.42036400  | -1.26195800 | 1.74771300  |
| O | 2.11666100  | -2.15124100 | 1.19077600  |
| C | 2.14519500  | -0.24162200 | 2.59229000  |

|   |            |             |            |
|---|------------|-------------|------------|
| C | 1.70628100 | 1.07136700  | 2.78687700 |
| C | 3.33788300 | -0.64756000 | 3.20034600 |
| C | 2.44553100 | 1.96262700  | 3.56099300 |
| H | 0.78607600 | 1.40584500  | 2.31638600 |
| C | 4.06601400 | 0.23253400  | 3.99599700 |
| H | 3.67708200 | -1.66341200 | 3.02621100 |
| C | 3.62772400 | 1.54457900  | 4.17191800 |
| H | 2.09459900 | 2.98307000  | 3.68905600 |
| H | 4.98311900 | -0.10135800 | 4.47153700 |
| H | 4.20083000 | 2.23525600  | 4.78230800 |

**Si-M4-3**

|   |             |             |             |
|---|-------------|-------------|-------------|
| C | -3.85520400 | -0.53775000 | -1.15601800 |
| C | -5.16764400 | -0.37127700 | -1.92085200 |
| H | -3.17159000 | -1.22384600 | -1.65883400 |
| H | -4.97907600 | -0.07302000 | -2.96149500 |
| N | -3.23250000 | 0.80417700  | -1.18822300 |
| O | -5.98099000 | 0.58797000  | -1.25901200 |
| C | -3.98529800 | 1.94157700  | -1.10486700 |
| C | -5.47396300 | 1.90044900  | -1.32462900 |
| H | -5.98480100 | 2.49528500  | -0.56567000 |
| H | -5.67029300 | 2.34804200  | -2.30984100 |
| N | -3.23211800 | 2.99912800  | -0.97397100 |
| C | -1.94449500 | 1.17669800  | -1.11971300 |
| N | -1.96481100 | 2.50387400  | -0.99023000 |
| C | -0.82331400 | 3.34281600  | -0.73386900 |
| C | -0.52607200 | 3.59036400  | 0.60803800  |
| C | -0.01286900 | 3.73457500  | -1.79833200 |
| C | 0.67571900  | 4.24262200  | 0.87793600  |
| C | 1.17397500  | 4.38818200  | -1.47427900 |
| C | 1.54134300  | 4.62990500  | -0.14820100 |
| H | 0.94998300  | 4.42447400  | 1.91414700  |
| H | 1.84033600  | 4.69453000  | -2.27663400 |
| H | -5.72085000 | -1.31107600 | -1.91260900 |
| C | -4.08607100 | -0.93193000 | 0.31510500  |
| H | -3.15649800 | -0.73747400 | 0.85669400  |
| H | -4.88072000 | -0.29135000 | 0.71204600  |
| C | -4.46057600 | -2.38580200 | 0.44309400  |
| C | -3.45582800 | -3.33711500 | 0.64210400  |
| C | -5.78922600 | -2.80802700 | 0.35352800  |
| C | -3.77368200 | -4.68929400 | 0.73185700  |
| H | -2.42905500 | -2.99349800 | 0.74801400  |
| C | -6.10900900 | -4.16055600 | 0.44457700  |
| H | -6.57672100 | -2.06778000 | 0.22668000  |

|   |             |             |             |
|---|-------------|-------------|-------------|
| C | -5.10034800 | -5.10342900 | 0.62850500  |
| H | -2.98639400 | -5.41948300 | 0.89005600  |
| H | -7.14511600 | -4.47760600 | 0.37896300  |
| H | -5.34836200 | -6.15755400 | 0.70146600  |
| C | 2.87813700  | 5.24851000  | 0.16277600  |
| H | 3.66522700  | 4.49054700  | 0.07832500  |
| H | 3.11684000  | 6.04993100  | -0.54045800 |
| H | 2.90537800  | 5.65393900  | 1.17602900  |
| C | -1.44965300 | 3.11282300  | 1.69303300  |
| H | -2.39106900 | 3.67106500  | 1.67416700  |
| H | -1.68079300 | 2.04995900  | 1.55904700  |
| H | -0.98813300 | 3.22521500  | 2.67564700  |
| C | -0.37297700 | 3.40264200  | -3.22132100 |
| H | -0.15173900 | 2.35157100  | -3.44158100 |
| H | -1.43533600 | 3.57207800  | -3.41558500 |
| H | 0.20710800  | 4.01452500  | -3.91364700 |
| C | 1.67432100  | 0.25405600  | -1.62080500 |
| C | 0.56245400  | 0.70775200  | -1.02369200 |
| H | 1.56190000  | -0.41361000 | -2.47553800 |
| C | 3.04022300  | 0.53973000  | -1.17892500 |
| C | 4.10715000  | -0.08624400 | -1.83372900 |
| C | 3.31769600  | 1.38367300  | -0.09206500 |
| C | 5.41787000  | 0.10915700  | -1.40800500 |
| H | 3.89750500  | -0.75996300 | -2.66002400 |
| C | 4.62440400  | 1.57621200  | 0.33315500  |
| H | 2.50722900  | 1.88813500  | 0.42698700  |
| C | 5.67876600  | 0.93720600  | -0.32126800 |
| H | 6.22976100  | -0.40526800 | -1.91113500 |
| H | 4.82418900  | 2.21608300  | 1.18725800  |
| H | 6.69783600  | 1.07859700  | 0.02353700  |
| C | -0.75649800 | 0.31397000  | -1.51399000 |
| O | -0.99709900 | -0.53341300 | -2.35498600 |
| H | 0.59714800  | 1.33206300  | -0.13945500 |
| C | 2.55963900  | -2.68701600 | -0.20980500 |
| C | 2.34168100  | -3.50926600 | -1.32474800 |
| H | 3.10977400  | -4.03499500 | -1.87110700 |
| C | 0.97084100  | -3.51069900 | -1.58146900 |
| H | 0.45306300  | -4.03392200 | -2.37141000 |
| C | 0.37138200  | -2.70031400 | -0.62104500 |
| H | -0.65457400 | -2.40296500 | -0.47950200 |
| N | 1.32071900  | -2.20699000 | 0.20839800  |
| C | 3.81788900  | -2.31536400 | 0.38257000  |
| O | 4.02336000  | -1.56405200 | 1.31972900  |
| C | 5.05989800  | -3.01342100 | -0.23622600 |

|   |             |             |             |
|---|-------------|-------------|-------------|
| F | 6.18230900  | -2.51896400 | 0.27663300  |
| F | 5.13675200  | -2.88252700 | -1.57389600 |
| F | 5.02724200  | -4.33014300 | 0.02192900  |
| C | 1.09753500  | -1.34474900 | 1.31040600  |
| H | 1.91709600  | -1.29627600 | 2.00649200  |
| C | -0.05764600 | -0.64213900 | 1.51072300  |
| O | -1.11940900 | -0.62240600 | 0.76211500  |
| C | -0.07951900 | 0.21419300  | 2.74581500  |
| C | 1.02020100  | 0.98902400  | 3.12985500  |
| C | -1.25025000 | 0.28263600  | 3.50916800  |
| C | 0.95352600  | 1.80699800  | 4.25666400  |
| H | 1.92909900  | 0.94626300  | 2.53458300  |
| C | -1.31493800 | 1.08856300  | 4.64037100  |
| H | -2.10738100 | -0.30805900 | 3.19783300  |
| C | -0.21278700 | 1.85790800  | 5.01700400  |
| H | 1.81433100  | 2.40551300  | 4.54042200  |
| H | -2.22507600 | 1.11978600  | 5.23199500  |
| H | -0.26356900 | 2.49165000  | 5.89696400  |

#### TS4RR

|   |             |             |             |
|---|-------------|-------------|-------------|
| C | -3.79525200 | -1.14900200 | -1.07190600 |
| C | -5.21772400 | -1.28999000 | -1.60571300 |
| H | -3.06272000 | -1.57535700 | -1.75808000 |
| H | -5.28579700 | -0.91554700 | -2.63690100 |
| N | -3.54282100 | 0.31169300  | -1.01647000 |
| O | -6.12073700 | -0.58882500 | -0.76189900 |
| C | -4.54518200 | 1.21860000  | -0.81318500 |
| C | -5.98969000 | 0.80633700  | -0.88843600 |
| H | -6.55214800 | 1.27642400  | -0.08035300 |
| H | -6.39688500 | 1.15499700  | -1.84876900 |
| N | -4.06785900 | 2.41965700  | -0.64104700 |
| C | -2.37922600 | 0.98360300  | -0.95414400 |
| N | -2.71909400 | 2.25625000  | -0.73076700 |
| C | -1.84041000 | 3.38763200  | -0.58254900 |
| C | -1.50405100 | 3.77756200  | 0.71464300  |
| C | -1.31245400 | 3.97411100  | -1.73222900 |
| C | -0.58150200 | 4.81473100  | 0.84276500  |
| C | -0.39361200 | 5.00482800  | -1.54921900 |
| C | -0.00948800 | 5.42749200  | -0.27479900 |
| H | -0.28840000 | 5.13534300  | 1.83926800  |
| H | 0.04524100  | 5.47791400  | -2.42378800 |
| H | -5.51176800 | -2.33973300 | -1.58763900 |
| C | -3.62063500 | -1.70856000 | 0.34931100  |
| H | -2.61295700 | -1.44436100 | 0.68722900  |

|   |             |             |             |
|---|-------------|-------------|-------------|
| H | -4.36002300 | -1.22185600 | 0.99546800  |
| C | -3.79104400 | -3.20657100 | 0.38999800  |
| C | -2.68486500 | -4.03888400 | 0.19613700  |
| C | -5.04767400 | -3.78029000 | 0.60612300  |
| C | -2.83979400 | -5.42276800 | 0.21088000  |
| H | -1.70473000 | -3.58631100 | 0.06576800  |
| C | -5.20129200 | -5.16405100 | 0.62060900  |
| H | -5.90719800 | -3.13303700 | 0.77083700  |
| C | -4.09609400 | -5.98783100 | 0.42028400  |
| H | -1.97436200 | -6.06227300 | 0.06734400  |
| H | -6.18102400 | -5.59844300 | 0.79362000  |
| H | -4.21283800 | -7.06684100 | 0.43564700  |
| C | 1.04332100  | 6.49226500  | -0.11372700 |
| H | 2.04045800  | 6.05162900  | -0.21940600 |
| H | 0.94331100  | 7.26630100  | -0.87807200 |
| H | 0.98558500  | 6.96424700  | 0.86909400  |
| C | -2.05114700 | 3.04050800  | 1.90600000  |
| H | -3.14429500 | 3.00876000  | 1.88773100  |
| H | -1.68354600 | 2.00539600  | 1.92128700  |
| H | -1.72899100 | 3.51367000  | 2.83412200  |
| C | -1.68403300 | 3.47248200  | -3.10137600 |
| H | -1.22778900 | 2.49402500  | -3.29033700 |
| H | -2.76755500 | 3.36397100  | -3.20524200 |
| H | -1.33044200 | 4.16048300  | -3.87035400 |
| C | 1.37346200  | 0.53771200  | -0.87561400 |
| C | 0.10116700  | 1.02701900  | -0.67647700 |
| H | 1.46475300  | -0.29814700 | -1.56763800 |
| C | 2.60976400  | 1.27760700  | -0.59661900 |
| C | 3.82412500  | 0.76655100  | -1.07921000 |
| C | 2.62504200  | 2.48929300  | 0.11233700  |
| C | 5.02518400  | 1.41451400  | -0.81883400 |
| H | 3.81906100  | -0.15509700 | -1.65577200 |
| C | 3.82730100  | 3.13888600  | 0.36740600  |
| H | 1.69474500  | 2.92380300  | 0.47043800  |
| C | 5.03075500  | 2.60137300  | -0.08888900 |
| H | 5.95489500  | 0.98889700  | -1.18287200 |
| H | 3.82718800  | 4.06860900  | 0.92822900  |
| H | 5.96706500  | 3.10882200  | 0.11923200  |
| C | -1.01556500 | 0.37952100  | -1.26981300 |
| O | -1.04263100 | -0.55179500 | -2.07901700 |
| H | -0.06899700 | 1.86448000  | -0.01511400 |
| C | 3.58872700  | -2.51476400 | -0.44845800 |
| C | 3.61830000  | -3.35781700 | -1.56669400 |
| H | 4.50888600  | -3.78512600 | -2.00195100 |

|   |             |             |             |
|---|-------------|-------------|-------------|
| C | 2.30010300  | -3.54628400 | -1.98342300 |
| H | 1.95893200  | -4.14512100 | -2.81448900 |
| C | 1.48261200  | -2.80881700 | -1.13197300 |
| H | 0.41847700  | -2.63087000 | -1.13897800 |
| N | 2.25420700  | -2.19660500 | -0.19423600 |
| C | 4.70494100  | -2.00443600 | 0.30574400  |
| O | 4.69572800  | -1.38448400 | 1.35448100  |
| C | 6.08637100  | -2.23265600 | -0.35816800 |
| F | 7.05470200  | -1.68641400 | 0.36721500  |
| F | 6.12188500  | -1.67097500 | -1.58082300 |
| F | 6.36723900  | -3.53583000 | -0.50935000 |
| C | 1.82289800  | -1.25232800 | 0.76109500  |
| H | 2.62356800  | -0.86563500 | 1.36882700  |
| C | 0.49314000  | -1.17737500 | 1.20618200  |
| O | -0.49131800 | -1.73641200 | 0.66837400  |
| C | 0.21613300  | -0.26478900 | 2.36926900  |
| C | 1.03319500  | 0.81361600  | 2.72656900  |
| C | -0.94947700 | -0.50419100 | 3.10575500  |
| C | 0.69186900  | 1.62781800  | 3.80437400  |
| H | 1.93454200  | 1.02508200  | 2.15896800  |
| C | -1.27985500 | 0.29705600  | 4.19371000  |
| H | -1.57368200 | -1.34461100 | 2.81872900  |
| C | -0.45904800 | 1.36750400  | 4.54589500  |
| H | 1.33120100  | 2.46515700  | 4.06789400  |
| H | -2.17547100 | 0.08523800  | 4.76975700  |
| H | -0.71586200 | 1.99597700  | 5.39321800  |

**TS4RS**

|   |             |            |             |
|---|-------------|------------|-------------|
| C | 4.00694800  | 0.82268500 | 0.15347700  |
| C | 5.35377800  | 1.50405900 | 0.38804900  |
| H | 3.74028900  | 0.14818900 | 0.96918800  |
| H | 5.38076000  | 1.99015000 | 1.37329300  |
| N | 3.01951800  | 1.92647300 | 0.16901600  |
| O | 5.58712200  | 2.45185500 | -0.64572700 |
| C | 3.32911500  | 3.18822500 | -0.25695500 |
| C | 4.75211500  | 3.58053800 | -0.55019100 |
| H | 4.80698700  | 4.12177700 | -1.49626900 |
| H | 5.08546300  | 4.25049500 | 0.25580200  |
| N | 2.28094300  | 3.96410100 | -0.23645900 |
| C | 1.71059000  | 1.91913900 | 0.47501100  |
| N | 1.28311800  | 3.15862200 | 0.22026500  |
| C | -0.06012700 | 3.65002700 | 0.37872100  |
| C | -0.83194600 | 3.79609400 | -0.77461600 |
| C | -0.54912400 | 3.85067000 | 1.67083900  |

|   |             |             |             |
|---|-------------|-------------|-------------|
| C | -2.17570300 | 4.12341600  | -0.60041700 |
| C | -1.89742400 | 4.17826500  | 1.78890400  |
| C | -2.72617300 | 4.29758000  | 0.67096800  |
| H | -2.80850600 | 4.22718900  | -1.47784400 |
| H | -2.31559100 | 4.32812900  | 2.78096500  |
| H | 6.15455600  | 0.76668900  | 0.32910700  |
| C | 3.94714500  | 0.10794400  | -1.20761500 |
| H | 2.91694100  | -0.21244100 | -1.37679000 |
| H | 4.24081100  | 0.82478500  | -1.98161100 |
| C | 4.85969700  | -1.09402000 | -1.22173600 |
| C | 4.38842700  | -2.31977800 | -0.74324400 |
| C | 6.17860900  | -0.99845200 | -1.67260600 |
| C | 5.22925100  | -3.42827000 | -0.70392100 |
| H | 3.35175200  | -2.38872800 | -0.42297700 |
| C | 7.01831200  | -2.10959000 | -1.63917500 |
| H | 6.54492200  | -0.04731500 | -2.05428600 |
| C | 6.54547000  | -3.32563000 | -1.15046600 |
| H | 4.85065700  | -4.37394400 | -0.32782900 |
| H | 8.03963000  | -2.02628400 | -1.99744000 |
| H | 7.19916200  | -4.19176300 | -1.12443000 |
| C | -4.19567000 | 4.57622800  | 0.84482200  |
| H | -4.71282200 | 3.66969800  | 1.17672300  |
| H | -4.36458700 | 5.34587000  | 1.60194700  |
| H | -4.65299600 | 4.90299600  | -0.09101900 |
| C | -0.23497800 | 3.58318900  | -2.13924700 |
| H | 0.53991600  | 4.32647400  | -2.34688200 |
| H | 0.22487600  | 2.59179500  | -2.21605100 |
| H | -1.00555200 | 3.65966100  | -2.90739800 |
| C | 0.33014700  | 3.68271800  | 2.88149900  |
| H | 1.30783000  | 4.14939800  | 2.73085000  |
| H | -0.13744800 | 4.14121900  | 3.75396400  |
| H | 0.49449200  | 2.62354900  | 3.10769500  |
| C | -1.08499400 | -0.39115900 | 1.55473400  |
| C | -0.39635500 | 0.65338600  | 0.98696600  |
| H | -0.52718700 | -1.03666100 | 2.23171900  |
| C | -2.54753800 | -0.49781100 | 1.61755900  |
| C | -3.12189000 | -1.54013600 | 2.35973100  |
| C | -3.39412900 | 0.41633600  | 0.97586600  |
| C | -4.49984000 | -1.67719700 | 2.44828100  |
| H | -2.46791900 | -2.25784400 | 2.84926600  |
| C | -4.77626000 | 0.27514900  | 1.06137100  |
| H | -2.97533000 | 1.23927100  | 0.40117100  |
| C | -5.33314800 | -0.77304500 | 1.79112700  |
| H | -4.92676000 | -2.49740200 | 3.01606800  |

|   |             |             |             |
|---|-------------|-------------|-------------|
| H | -5.42043100 | 0.97878800  | 0.54417100  |
| H | -6.41127000 | -0.88481800 | 1.84686300  |
| C | 0.99480600  | 0.80708900  | 1.23557500  |
| O | 1.70055500  | 0.25637900  | 2.08527700  |
| H | -0.87480700 | 1.31520400  | 0.27616600  |
| C | -2.85263000 | -1.08641300 | -1.75579800 |
| C | -2.97962400 | -0.10668200 | -2.74445700 |
| H | -3.89378700 | 0.13712000  | -3.26441600 |
| C | -1.72161900 | 0.47024000  | -2.92814300 |
| H | -1.45643900 | 1.24496200  | -3.63209800 |
| C | -0.84255700 | -0.15825900 | -2.05151200 |
| H | 0.21496100  | -0.04041900 | -1.88319300 |
| N | -1.51718600 | -1.11144300 | -1.34733600 |
| C | -3.88300100 | -1.94285100 | -1.22702300 |
| C | -0.98537500 | -1.96377400 | -0.36449700 |
| H | -1.68692400 | -2.69019000 | 0.00823300  |
| C | 0.38763200  | -2.05742400 | -0.09576800 |
| O | 1.25942000  | -1.23860900 | -0.49532900 |
| C | 0.79575700  | -3.16361700 | 0.83841900  |
| C | 0.17760600  | -4.41812100 | 0.82041800  |
| C | 1.85229100  | -2.93910400 | 1.72695000  |
| C | 0.60475300  | -5.42680900 | 1.67983600  |
| H | -0.62311000 | -4.61427600 | 0.11360600  |
| C | 2.27757900  | -3.94715100 | 2.58593800  |
| H | 2.30896500  | -1.95395600 | 1.74088700  |
| C | 1.65510200  | -5.19441600 | 2.56454000  |
| H | 0.12263500  | -6.39905300 | 1.64998200  |
| H | 3.09192400  | -3.75860500 | 3.27896100  |
| H | 1.98812700  | -5.98192200 | 3.23349300  |
| C | -5.30086700 | -1.68768300 | -1.79957100 |
| O | -3.77160100 | -2.85455400 | -0.42709800 |
| F | -5.67660100 | -0.40152900 | -1.70503900 |
| F | -6.20306100 | -2.42143600 | -1.15793100 |
| F | -5.34676800 | -2.01327100 | -3.10156500 |

**TS4SR**

|   |            |             |             |
|---|------------|-------------|-------------|
| C | 3.71369800 | -0.16236500 | -0.17410900 |
| C | 4.86792100 | 0.06708800  | 0.79696900  |
| H | 3.09414100 | -1.00354500 | 0.13673900  |
| H | 4.50063400 | 0.09903800  | 1.83298100  |
| N | 2.87423100 | 1.05648200  | -0.09437500 |
| O | 5.54026300 | 1.27621400  | 0.47426400  |
| C | 3.37559600 | 2.27164900  | 0.27457500  |
| C | 4.77204200 | 2.40498100  | 0.81053000  |



|   |             |             |             |
|---|-------------|-------------|-------------|
| H | 5.25399800  | 3.28721200  | 0.38683200  |
| H | 4.70413200  | 2.52798900  | 1.90159300  |
| N | 2.46945500  | 3.20486400  | 0.18132800  |
| C | 1.57580700  | 1.24082800  | -0.39536700 |
| N | 1.35578700  | 2.54966700  | -0.23835800 |
| C | 0.18286100  | 3.30321500  | -0.60808200 |
| C | -0.09623000 | 3.43820900  | -1.97255100 |
| C | -0.62905000 | 3.81721900  | 0.40261300  |
| C | -1.27079400 | 4.10001800  | -2.31500200 |
| C | -1.79114000 | 4.47859300  | 0.00090600  |
| C | -2.13485700 | 4.61304300  | -1.34365400 |
| H | -1.52178400 | 4.21211900  | -3.36658200 |
| H | -2.45020600 | 4.88246800  | 0.76494400  |
| H | 5.59273600  | -0.74222000 | 0.69490200  |
| C | 4.19223000  | -0.36865600 | -1.61750700 |
| H | 3.32754700  | -0.26278600 | -2.27770200 |
| H | 4.92493400  | 0.40676000  | -1.86376300 |
| C | 4.78895900  | -1.74699600 | -1.76482300 |
| C | 3.94701100  | -2.86483800 | -1.74916100 |
| C | 6.16744200  | -1.93292400 | -1.87106500 |
| C | 4.48112800  | -4.14613600 | -1.84281800 |
| H | 2.87220000  | -2.71642900 | -1.66158600 |
| C | 6.70237400  | -3.21662600 | -1.96755500 |
| H | 6.82429600  | -1.06639500 | -1.88051500 |
| C | 5.86003300  | -4.32436800 | -1.95311400 |
| H | 3.82050900  | -5.00743100 | -1.83459100 |
| H | 7.77611700  | -3.34939600 | -2.05418400 |
| H | 6.27498900  | -5.32423600 | -2.02907000 |
| C | -3.42769300 | 5.26828200  | -1.75075000 |
| H | -3.28103600 | 5.93412400  | -2.60466800 |
| H | -4.15645500 | 4.50706700  | -2.04866000 |
| H | -3.85773900 | 5.84527500  | -0.92993400 |
| C | 0.80600000  | 2.85499400  | -3.02829700 |
| H | 1.86255900  | 3.00874000  | -2.78954100 |
| H | 0.63473500  | 1.77778300  | -3.13711900 |
| H | 0.60528600  | 3.31898100  | -3.99487300 |
| C | -0.32803700 | 3.58868000  | 1.85737300  |
| H | -0.81999600 | 4.34659000  | 2.46959700  |
| H | -0.71197700 | 2.61106700  | 2.16965000  |
| H | 0.74278100  | 3.61678200  | 2.06723000  |
| C | -1.69066700 | -0.52396600 | -1.13288500 |
| C | -0.76489300 | 0.39324100  | -0.72653900 |
| H | -1.34038600 | -1.49924500 | -1.47339600 |
| C | -3.10530200 | -0.22849400 | -1.33879800 |

|   |             |             |             |
|---|-------------|-------------|-------------|
| C | -3.89460800 | -1.17489600 | -2.00834400 |
| C | -3.69989200 | 0.97321500  | -0.91732600 |
| C | -5.24219500 | -0.93224900 | -2.24931500 |
| H | -3.44449000 | -2.12238100 | -2.29386300 |
| C | -5.04631600 | 1.20961700  | -1.15469800 |
| H | -3.11371200 | 1.72176200  | -0.39021000 |
| C | -5.82119900 | 0.25887300  | -1.82294900 |
| H | -5.84389600 | -1.68565900 | -2.74688800 |
| H | -5.49795200 | 2.13593800  | -0.81249300 |
| H | -6.87567600 | 0.44569000  | -2.00028600 |
| C | 0.63663600  | 0.12360800  | -0.82778500 |
| O | 1.19016300  | -0.88284800 | -1.26497600 |
| H | -1.07924500 | 1.35344600  | -0.34491000 |
| C | 0.33385000  | -1.32174100 | 1.96886200  |
| C | 1.63496100  | -1.85985900 | 1.90561800  |
| H | 2.50029200  | -1.46135000 | 2.41505700  |
| C | 1.57689000  | -2.99115200 | 1.10189000  |
| H | 2.39698900  | -3.64162500 | 0.83221900  |
| C | 0.24856200  | -3.15493800 | 0.69556900  |
| H | -0.23007700 | -3.90208300 | 0.08419700  |
| N | -0.50616700 | -2.16522500 | 1.22881700  |
| C | -0.09355600 | -0.12739600 | 2.62524200  |
| C | -1.89891200 | -2.02758300 | 1.14704900  |
| H | -2.30732100 | -1.32352900 | 1.84752600  |
| C | -2.69432400 | -2.88052400 | 0.37529500  |
| O | -2.26817300 | -3.72617100 | -0.45571600 |
| C | -4.18791900 | -2.73158200 | 0.53514000  |
| C | -4.81049200 | -1.62818400 | 1.13086500  |
| C | -4.98820700 | -3.73736300 | -0.01388500 |
| C | -6.19720300 | -1.53556600 | 1.16892700  |
| H | -4.21882800 | -0.80745600 | 1.52415200  |
| C | -6.37555200 | -3.65179400 | 0.03411000  |
| H | -4.48831800 | -4.57318400 | -0.49141200 |
| C | -6.98628000 | -2.54648400 | 0.62288800  |
| H | -6.66396000 | -0.66210400 | 1.61457000  |
| H | -6.98251000 | -4.44435600 | -0.39386300 |
| H | -8.06901900 | -2.47057200 | 0.65362000  |
| O | -1.20460700 | 0.38807400  | 2.64667200  |
| C | 1.02757600  | 0.63036000  | 3.38721400  |
| F | 1.94224700  | 1.13630300  | 2.51987700  |
| F | 0.53043600  | 1.65244100  | 4.07304500  |
| F | 1.69774300  | -0.14982300 | 4.24140400  |

TS4SS

|   |             |             |             |
|---|-------------|-------------|-------------|
| C | 3.95254800  | -0.23201800 | 0.16858900  |
| C | 5.07919400  | -0.21403900 | 1.19884400  |
| H | 3.14899700  | -0.90428500 | 0.47750700  |
| H | 4.68056500  | -0.11154600 | 2.21591700  |
| N | 3.38106700  | 1.13824300  | 0.17833500  |
| O | 5.97788300  | 0.84926800  | 0.90845300  |
| C | 4.04041200  | 2.22480300  | 0.67772700  |
| C | 5.42471200  | 2.09513900  | 1.24899100  |
| H | 6.06843600  | 2.87766000  | 0.84395400  |
| H | 5.36360500  | 2.21992900  | 2.33975500  |
| N | 3.29367300  | 3.29476100  | 0.63552000  |
| C | 2.15234000  | 1.55762200  | -0.18410700 |
| N | 2.12352200  | 2.86257700  | 0.09505700  |
| C | 1.03734000  | 3.78300800  | -0.11339300 |
| C | 0.78909000  | 4.24260100  | -1.40600700 |
| C | 0.25850800  | 4.12427100  | 0.99546400  |
| C | -0.30831900 | 5.08601800  | -1.57536000 |
| C | -0.82654800 | 4.96653700  | 0.77126200  |
| C | -1.12788600 | 5.44850400  | -0.50611500 |
| H | -0.53170000 | 5.46038900  | -2.57074400 |
| H | -1.45796700 | 5.24489600  | 1.61083700  |
| H | 5.63988400  | -1.14812000 | 1.12528800  |
| C | 4.47419900  | -0.62273100 | -1.22193100 |
| H | 3.76249200  | -0.27823200 | -1.97297000 |
| H | 5.43587500  | -0.12625700 | -1.38824200 |
| C | 4.61912500  | -2.12594700 | -1.30075300 |
| C | 3.47558700  | -2.93501800 | -1.29115100 |
| C | 5.87785500  | -2.72739200 | -1.34753200 |
| C | 3.59959200  | -4.32004900 | -1.33216900 |
| H | 2.48183500  | -2.49238900 | -1.24520700 |
| C | 6.00006600  | -4.11564700 | -1.39199900 |
| H | 6.76861900  | -2.10327500 | -1.35373200 |
| C | 4.86013200  | -4.91457000 | -1.38377200 |
| H | 2.69918900  | -4.92692800 | -1.32215300 |
| H | 6.98515200  | -4.56992000 | -1.43202300 |
| H | 4.95335700  | -5.99552100 | -1.41740700 |
| C | -2.33941300 | 6.31535400  | -0.72557400 |
| H | -2.23173500 | 6.92711200  | -1.62326100 |
| H | -3.23144800 | 5.69312400  | -0.85037800 |
| H | -2.51281900 | 6.97539000  | 0.12715300  |
| C | 1.64069400  | 3.81034100  | -2.56900500 |
| H | 2.70542700  | 3.84836500  | -2.32283500 |
| H | 1.39804100  | 2.78296800  | -2.86329700 |
| H | 1.46343400  | 4.45376800  | -3.43154000 |

|   |             |             |             |
|---|-------------|-------------|-------------|
| C | 0.56404300  | 3.55578200  | 2.35501300  |
| H | 0.55769900  | 2.45980100  | 2.32305700  |
| H | 1.55295200  | 3.86873500  | 2.70190800  |
| H | -0.18002400 | 3.87821500  | 3.08387900  |
| C | -1.17445300 | 0.14512500  | -1.26391500 |
| C | -0.26675400 | 1.02161100  | -0.72100200 |
| H | -0.77267000 | -0.69212800 | -1.83229000 |
| C | -2.60640700 | 0.39521200  | -1.38498300 |
| C | -3.31689600 | -0.24972600 | -2.40577900 |
| C | -3.29419200 | 1.25652400  | -0.51629000 |
| C | -4.68080500 | -0.03298500 | -2.56496000 |
| H | -2.79194100 | -0.93311100 | -3.06640800 |
| C | -4.65716700 | 1.46466800  | -0.67049000 |
| H | -2.76554600 | 1.72312600  | 0.31017300  |
| C | -5.35247700 | 0.82330300  | -1.69807300 |
| H | -5.22090700 | -0.54890800 | -3.35191000 |
| H | -5.18704600 | 2.10956900  | 0.02329400  |
| H | -6.42142900 | 0.97664100  | -1.80416100 |
| C | 1.10938300  | 0.65843600  | -0.80413500 |
| O | 1.55131000  | -0.36785400 | -1.32423700 |
| H | -0.57672800 | 1.93404300  | -0.22830300 |
| C | -3.98117100 | -2.20903400 | 0.11456300  |
| C | -4.78615300 | -2.96329100 | -0.75257000 |
| H | -5.86511000 | -2.99273800 | -0.73055800 |
| C | -3.94145900 | -3.63364700 | -1.63301500 |
| H | -4.22756100 | -4.30104400 | -2.43223800 |
| C | -2.63103700 | -3.29151600 | -1.29924300 |
| H | -1.68044200 | -3.60436200 | -1.69961500 |
| N | -2.64876900 | -2.44086200 | -0.23923400 |
| C | -4.40404900 | -1.35502200 | 1.18682900  |
| O | -3.72301800 | -0.67820300 | 1.94283700  |
| C | -5.93637000 | -1.32419300 | 1.42636700  |
| F | -6.23796300 | -0.47877000 | 2.40772300  |
| F | -6.39505000 | -2.53751000 | 1.77005200  |
| F | -6.61965300 | -0.93869800 | 0.33610100  |
| C | -1.53444900 | -1.89431500 | 0.41645800  |
| H | -1.79296100 | -1.29067800 | 1.26810500  |
| C | -0.23235100 | -2.41054000 | 0.24706200  |
| O | 0.13293600  | -3.24868500 | -0.61083800 |
| C | 0.76171900  | -1.94569500 | 1.28117900  |
| C | 0.66703700  | -0.72933800 | 1.97257100  |
| C | 1.81358300  | -2.81613200 | 1.59439400  |
| C | 1.59508700  | -0.40385300 | 2.96215700  |
| H | -0.14658200 | -0.04477100 | 1.74890900  |

|   |            |             |            |
|---|------------|-------------|------------|
| C | 2.72649100 | -2.50147000 | 2.59532700 |
| H | 1.88483200 | -3.74511100 | 1.03894300 |
| C | 2.61626800 | -1.29472000 | 3.28887300 |
| H | 1.50170000 | 0.53407500  | 3.50326300 |
| H | 3.52120200 | -3.19971900 | 2.84066900 |
| H | 3.31609000 | -1.05502400 | 4.08422300 |

**M5RR**

|   |             |             |             |
|---|-------------|-------------|-------------|
| C | 3.60669700  | 0.56810400  | 0.69257000  |
| C | 4.82082500  | 0.16748900  | 1.46427500  |
| C | 4.07581300  | -2.01243000 | 1.55347500  |
| C | 2.85023900  | -1.82509900 | 0.61880300  |
| C | 1.60970300  | 0.29012300  | -0.14858400 |
| H | 5.62966500  | -0.15232800 | 0.79158100  |
| H | 4.94457000  | -2.30915900 | 0.95034200  |
| H | 1.93289700  | -2.14472400 | 1.11397400  |
| N | 3.19870500  | 1.76981700  | 0.41790700  |
| N | 1.95921300  | 1.58413700  | -0.12051400 |
| N | 2.67765600  | -0.37717400 | 0.34487900  |
| H | 3.84547000  | -2.81606000 | 2.25418600  |
| H | 5.16022500  | 1.00792100  | 2.06963800  |
| O | 4.42445000  | -0.88068500 | 2.31974200  |
| C | 3.05525400  | -2.67191800 | -0.65692700 |
| H | 3.49441200  | -3.62180000 | -0.32941400 |
| H | 2.07187200  | -2.86659500 | -1.07936300 |
| C | 3.93370500  | -2.01143000 | -1.68923100 |
| C | 5.31611300  | -2.21125900 | -1.74071600 |
| C | 3.34250400  | -1.15803400 | -2.62867800 |
| C | 6.09522300  | -1.55998700 | -2.69587500 |
| H | 5.78753700  | -2.90310300 | -1.04696200 |
| C | 4.11786600  | -0.51470900 | -3.58899200 |
| H | 2.26101800  | -1.03318000 | -2.59981700 |
| C | 5.49817300  | -0.70779900 | -3.62029600 |
| H | 7.16675600  | -1.73034100 | -2.72505000 |
| H | 3.64316600  | 0.13130600  | -4.32177100 |
| H | 6.10231000  | -0.20723200 | -4.36993100 |
| C | 1.22109900  | 2.73642000  | -0.57267100 |
| C | 0.64476900  | 3.57107200  | 0.39015800  |
| C | 1.10365100  | 2.96011800  | -1.94382100 |
| C | -0.07708900 | 4.67035700  | -0.06884400 |
| C | 0.36554000  | 4.07092400  | -2.35130800 |
| C | -0.23014900 | 4.93340600  | -1.43242200 |
| H | -0.54345900 | 5.33042500  | 0.65856600  |
| H | 0.25092100  | 4.26052000  | -3.41531400 |

|   |             |             |             |
|---|-------------|-------------|-------------|
| C | 0.73389100  | 3.24668700  | 1.85618900  |
| H | 0.19747100  | 2.31583400  | 2.07407500  |
| H | 1.76975100  | 3.10771500  | 2.17591400  |
| H | 0.28565900  | 4.04454600  | 2.45036000  |
| C | -1.00934900 | 6.13699500  | -1.89422800 |
| H | -1.35277700 | 6.01441500  | -2.92328200 |
| H | -1.88117900 | 6.30781500  | -1.25790800 |
| H | -0.38918500 | 7.03807300  | -1.85224600 |
| C | 1.71095900  | 2.01269200  | -2.93921800 |
| H | 2.72983400  | 1.73533700  | -2.65480300 |
| H | 1.11759700  | 1.09214700  | -2.99442500 |
| H | 1.73582800  | 2.46206100  | -3.93348200 |
| C | 0.31002900  | -0.33075200 | -0.57456200 |
| O | 0.36002500  | -1.53585600 | -0.98411800 |
| C | -0.79037600 | 0.46135900  | -0.39865300 |
| C | -2.13868500 | -0.13097700 | -0.64343600 |
| H | -0.70220200 | 1.43799700  | 0.04886700  |
| H | -2.06126300 | -0.79817000 | -1.51040600 |
| C | -3.25038400 | 0.86622500  | -0.91279100 |
| C | -3.16763200 | 2.21190000  | -0.54106600 |
| C | -4.41750900 | 0.42878500  | -1.55059500 |
| C | -4.22346800 | 3.08702800  | -0.78677600 |
| H | -2.27681600 | 2.59552300  | -0.05399100 |
| C | -5.47581900 | 1.29862400  | -1.79323100 |
| H | -4.49434800 | -0.60859600 | -1.86899100 |
| C | -5.38324200 | 2.63427900  | -1.40847500 |
| H | -4.13500000 | 4.12772600  | -0.48953900 |
| H | -6.36979700 | 0.93383800  | -2.28881500 |
| H | -6.20569300 | 3.31650000  | -1.59822200 |
| C | -3.43056400 | 0.53763900  | 2.18065000  |
| C | -2.99897600 | 1.25820300  | 3.28479600  |
| C | -1.71967000 | 0.79056000  | 3.60701300  |
| C | -1.39744800 | -0.21671000 | 2.69372300  |
| N | -2.47746300 | -0.36003800 | 1.82799600  |
| H | -4.34916600 | 0.60260700  | 1.62003900  |
| H | -3.56368100 | 2.02118600  | 3.79832600  |
| H | -1.09946100 | 1.11239300  | 4.42943200  |
| C | -0.23385600 | -1.06636200 | 2.66445500  |
| O | -0.09182600 | -2.10261500 | 2.03676700  |
| C | 0.99442500  | -0.59789400 | 3.48631100  |
| F | 0.69513900  | -0.27147800 | 4.74791400  |
| F | 1.55309900  | 0.48301100  | 2.90883500  |
| F | 1.91436700  | -1.55783100 | 3.52252200  |
| C | -2.45013100 | -1.09681300 | 0.56976500  |

|   |             |             |             |
|---|-------------|-------------|-------------|
| H | -1.59898700 | -1.77575500 | 0.61582800  |
| C | -3.70865200 | -1.92300100 | 0.35823500  |
| O | -4.73823700 | -1.69808400 | 0.96418700  |
| C | -3.63763300 | -3.01688700 | -0.66442300 |
| C | -4.83301200 | -3.67541000 | -0.97653200 |
| C | -2.44612200 | -3.39619200 | -1.29721800 |
| C | -4.84434500 | -4.70381400 | -1.90855200 |
| H | -5.74048700 | -3.36236700 | -0.47095300 |
| C | -2.46612900 | -4.43043900 | -2.23036300 |
| H | -1.50188100 | -2.89505800 | -1.08660100 |
| C | -3.65737700 | -5.08304600 | -2.53608800 |
| H | -5.77350400 | -5.21070600 | -2.14748800 |
| H | -1.54376200 | -4.72402500 | -2.72035900 |
| H | -3.66300300 | -5.88742200 | -3.26501800 |

**M5RS**

|   |             |             |             |
|---|-------------|-------------|-------------|
| C | 0.81563900  | -1.12377600 | -1.40364100 |
| O | 1.06256700  | -0.90156800 | -2.62862800 |
| C | -0.29264800 | -0.89894900 | -0.63911800 |
| C | -1.55020700 | -0.34482500 | -1.22234000 |
| H | -0.28621100 | -1.17112600 | 0.41031600  |
| H | -1.48987400 | -0.42102300 | -2.31399000 |
| C | -2.78839300 | -1.09257000 | -0.75601500 |
| C | -3.01414900 | -1.32364800 | 0.60471300  |
| C | -3.75180300 | -1.51099500 | -1.67538900 |
| C | -4.17737600 | -1.95377100 | 1.03471600  |
| H | -2.27858800 | -1.00346400 | 1.33895900  |
| C | -4.91571800 | -2.14747000 | -1.24920200 |
| H | -3.59037300 | -1.32405900 | -2.73385100 |
| C | -5.13352100 | -2.36769700 | 0.10801200  |
| H | -4.33900300 | -2.12075400 | 2.09565400  |
| H | -5.65406600 | -2.46612200 | -1.97839000 |
| H | -6.04278700 | -2.85656000 | 0.44361200  |
| C | -0.25079200 | 1.97860000  | -2.71139500 |
| C | 0.71006500  | 2.96146800  | -2.91060000 |
| C | 0.94749600  | 3.55949700  | -1.66991300 |
| C | 0.12463000  | 2.93014300  | -0.73075300 |
| N | -0.60519300 | 1.95646500  | -1.40692800 |
| H | -0.70112800 | 1.29820400  | -3.41534800 |
| H | 1.18375000  | 3.19499000  | -3.85174200 |
| H | 1.65180000  | 4.34794000  | -1.45175400 |
| C | 0.07648700  | 3.15180000  | 0.69002700  |
| O | -0.58950900 | 2.55387800  | 1.52200000  |
| C | 0.95767900  | 4.31685700  | 1.20931600  |

|   |             |             |             |
|---|-------------|-------------|-------------|
| F | 2.23151100  | 4.22720900  | 0.80633100  |
| F | 0.47939600  | 5.48760500  | 0.76012200  |
| F | 0.94983500  | 4.34618800  | 2.53731200  |
| C | -1.70596900 | 1.16337400  | -0.86542800 |
| H | -1.66268500 | 1.25565800  | 0.21520800  |
| C | -3.04969300 | 1.65337400  | -1.42122000 |
| O | -3.18838800 | 1.78238400  | -2.62178100 |
| C | -4.18904700 | 1.84115700  | -0.47645500 |
| C | -5.48432300 | 1.68238800  | -0.98059000 |
| C | -3.99956600 | 2.16804700  | 0.86990400  |
| C | -6.58136800 | 1.83346000  | -0.14370000 |
| H | -5.60462600 | 1.42856500  | -2.02876000 |
| C | -5.10377800 | 2.33796900  | 1.70061700  |
| H | -3.00040900 | 2.31651400  | 1.27024200  |
| C | -6.39066200 | 2.16318500  | 1.19845500  |
| H | -7.58477200 | 1.69553500  | -0.53282400 |
| H | -4.95755100 | 2.60519400  | 2.74188000  |
| H | -7.24799900 | 2.28496200  | 1.85294000  |
| C | 3.97045500  | -2.43778500 | -0.12848900 |
| C | 5.46725300  | -2.45976600 | -0.20710500 |
| C | 5.37753900  | -0.51974300 | -1.47715800 |
| C | 3.86033800  | -0.45516300 | -1.68742400 |
| C | 1.95582200  | -1.78097000 | -0.66101000 |
| H | 5.90073000  | -1.93733700 | 0.65750500  |
| H | 5.64989900  | 0.00945900  | -0.55387100 |
| H | 3.58708200  | -0.70305800 | -2.71481200 |
| N | 3.18011600  | -3.25071600 | 0.51069900  |
| N | 1.92780800  | -2.82543500 | 0.17035800  |
| N | 3.26145800  | -1.51539000 | -0.85033300 |
| H | 5.86997000  | -0.03332300 | -2.32093900 |
| H | 5.81896200  | -3.49199500 | -0.21201500 |
| O | 5.85760900  | -1.85056500 | -1.41598600 |
| C | 3.28887500  | 0.93624200  | -1.35363500 |
| H | 3.82370600  | 1.64592900  | -1.99627800 |
| H | 2.24419000  | 0.95135600  | -1.67608000 |
| C | 3.41296700  | 1.35559500  | 0.09375300  |
| C | 4.53616000  | 2.04656600  | 0.55834700  |
| C | 2.38139300  | 1.08136800  | 0.99900700  |
| C | 4.63963600  | 2.43215400  | 1.89318900  |
| H | 5.33108800  | 2.30581500  | -0.13760600 |
| C | 2.47683900  | 1.47311900  | 2.33272200  |
| H | 1.47357800  | 0.60035100  | 0.63859700  |
| C | 3.61111600  | 2.14323300  | 2.78555000  |
| H | 5.51756000  | 2.97391400  | 2.23050700  |



|   |             |             |             |
|---|-------------|-------------|-------------|
| H | 1.64734100  | 1.28117300  | 3.00685400  |
| H | 3.68281100  | 2.45742000  | 3.82170400  |
| C | 0.75477000  | -3.49660000 | 0.66190700  |
| C | 0.00505800  | -4.26555500 | -0.23257200 |
| C | 0.38354900  | -3.27456100 | 1.98681800  |
| C | -1.17771300 | -4.81842400 | 0.24863400  |
| C | -0.80954400 | -3.85449300 | 2.42015200  |
| C | -1.60391200 | -4.61665700 | 1.56437200  |
| H | -1.79177000 | -5.41078500 | -0.42517100 |
| H | -1.13040500 | -3.69152700 | 3.44586200  |
| C | 0.44705400  | -4.45724700 | -1.65893000 |
| H | 0.35209700  | -3.52906900 | -2.23340600 |
| H | 1.49483000  | -4.76962900 | -1.70691000 |
| H | -0.16119000 | -5.22196100 | -2.14419500 |
| C | -2.90945000 | -5.20506900 | 2.03077000  |
| H | -3.09357200 | -4.97923600 | 3.08318000  |
| H | -3.73859100 | -4.79851500 | 1.44336400  |
| H | -2.91584400 | -6.29187200 | 1.90722000  |
| C | 1.22404400  | -2.41188800 | 2.89044700  |
| H | 2.18710900  | -2.88541800 | 3.10195600  |
| H | 1.43876300  | -1.44262000 | 2.42493600  |
| H | 0.71055900  | -2.23187600 | 3.83605900  |

**M5SR**

|   |            |             |             |
|---|------------|-------------|-------------|
| C | 3.67790400 | 0.34598300  | 1.00440400  |
| C | 4.92343800 | -0.32799400 | 1.47438100  |
| C | 4.33970100 | -2.29511300 | 0.34161000  |
| C | 3.31322000 | -1.55325900 | -0.57292700 |
| C | 1.75392300 | 0.39943400  | -0.03807500 |
| H | 5.75207600 | -0.17233500 | 0.76918000  |
| H | 5.28762500 | -2.39127100 | -0.20359400 |
| H | 2.39738600 | -2.13111300 | -0.69859100 |
| N | 3.09515900 | 1.41653000  | 1.45508200  |
| N | 1.90324100 | 1.44564700  | 0.78632500  |
| N | 2.90219300 | -0.29968500 | 0.08256900  |
| H | 3.96049400 | -3.29407400 | 0.56180500  |
| H | 5.20139200 | 0.04918000  | 2.45833400  |
| O | 4.58898200 | -1.69569700 | 1.59737400  |
| C | 3.89317700 | -1.27459100 | -1.97746600 |
| H | 4.24437200 | -2.23468800 | -2.37165900 |
| H | 3.05466600 | -0.93657500 | -2.58909800 |
| C | 5.00935000 | -0.26236100 | -1.97187300 |
| C | 6.35532000 | -0.64075700 | -1.95721100 |
| C | 4.70142100 | 1.10298500  | -1.92923600 |

|   |             |             |             |
|---|-------------|-------------|-------------|
| C | 7.36532300  | 0.31528000  | -1.86376800 |
| H | 6.61585000  | -1.69411700 | -2.02609300 |
| C | 5.70545500  | 2.06090600  | -1.82960400 |
| H | 3.65832500  | 1.40811000  | -1.98344600 |
| C | 7.04215200  | 1.66765300  | -1.78696500 |
| H | 8.40451800  | 0.00259100  | -1.85359700 |
| H | 5.44628600  | 3.11458100  | -1.79399300 |
| H | 7.82747200  | 2.41239400  | -1.71020100 |
| C | 0.97894400  | 2.51931600  | 1.03083900  |
| C | 0.20996600  | 2.47682900  | 2.19468000  |
| C | 0.86474800  | 3.52603600  | 0.07041100  |
| C | -0.72583000 | 3.49580300  | 2.37396500  |
| C | -0.08678700 | 4.51672200  | 0.29412600  |
| C | -0.89826900 | 4.50902700  | 1.43061500  |
| H | -1.34590800 | 3.48477000  | 3.26688500  |
| H | -0.20556100 | 5.30755600  | -0.44207900 |
| C | 0.31957700  | 1.33074700  | 3.16384500  |
| H | -0.19860600 | 0.44893300  | 2.76963800  |
| H | 1.35925600  | 1.05366300  | 3.35272300  |
| H | -0.14923500 | 1.58897700  | 4.11497400  |
| C | -1.96612400 | 5.55583100  | 1.61002200  |
| H | -2.85946300 | 5.28181500  | 1.03898800  |
| H | -2.25463100 | 5.65448600  | 2.65857200  |
| H | -1.63019900 | 6.53077800  | 1.24904800  |
| C | 1.71136300  | 3.50807000  | -1.17245600 |
| H | 2.76747000  | 3.35776100  | -0.92628000 |
| H | 1.39643400  | 2.69361700  | -1.83525700 |
| H | 1.61365700  | 4.44698800  | -1.71915700 |
| C | 0.61551900  | -0.00384000 | -0.94616900 |
| O | 0.94852100  | -0.73667200 | -1.92574700 |
| C | -0.62438400 | 0.42506800  | -0.55388800 |
| C | -1.84605400 | -0.00536400 | -1.29889200 |
| H | -0.75479100 | 1.02201900  | 0.33688600  |
| H | -1.57546400 | -0.24888100 | -2.33361800 |
| C | -2.94909400 | 1.03619600  | -1.28580600 |
| C | -3.36897100 | 1.61033800  | -0.08075500 |
| C | -3.62250600 | 1.37559000  | -2.46030100 |
| C | -4.43830800 | 2.50008000  | -0.05271100 |
| H | -2.86576800 | 1.34631500  | 0.84753900  |
| C | -4.68981800 | 2.27114300  | -2.43656600 |
| H | -3.31300700 | 0.92161500  | -3.39795600 |
| C | -5.10254200 | 2.83366500  | -1.23211700 |
| H | -4.75887600 | 2.92774100  | 0.89252200  |
| H | -5.20161600 | 2.52468200  | -3.35974900 |

|   |             |             |             |
|---|-------------|-------------|-------------|
| H | -5.93873600 | 3.52522400  | -1.21042700 |
| C | -1.08125800 | -3.09989700 | -1.82558600 |
| C | -0.01248300 | -3.93073100 | -1.52039000 |
| C | 0.31895100  | -3.69705600 | -0.18328200 |
| C | -0.57026500 | -2.73652400 | 0.30980900  |
| N | -1.43855200 | -2.40552300 | -0.72162400 |
| H | -1.61014800 | -2.94810600 | -2.75284500 |
| H | 0.46585400  | -4.61533500 | -2.20390800 |
| H | 1.09234600  | -4.18419400 | 0.39305700  |
| C | -0.62572600 | -2.17937600 | 1.63439400  |
| O | -1.50148400 | -1.48823900 | 2.13238800  |
| C | 0.61265600  | -2.47259200 | 2.51862200  |
| F | 1.73195000  | -1.99352900 | 1.94397700  |
| F | 0.79295400  | -3.78606600 | 2.71231300  |
| F | 0.48808300  | -1.89439800 | 3.70719500  |
| C | -2.42028300 | -1.32490400 | -0.67201800 |
| H | -2.60535200 | -1.12137900 | 0.37603200  |
| C | -3.72358100 | -1.68659700 | -1.38097100 |
| O | -3.71571800 | -2.07118100 | -2.53574200 |
| C | -5.00835100 | -1.43515300 | -0.66135400 |
| C | -6.14741800 | -1.19706100 | -1.43760700 |
| C | -5.10594400 | -1.43436500 | 0.73399700  |
| C | -7.36903400 | -0.94748500 | -0.82719400 |
| H | -6.04701700 | -1.20016000 | -2.51802300 |
| C | -6.33642000 | -1.20358700 | 1.34193800  |
| H | -4.23548700 | -1.63031300 | 1.35346700  |
| C | -7.46423300 | -0.95316900 | 0.56438700  |
| H | -8.24753900 | -0.74832400 | -1.43196000 |
| H | -6.41272100 | -1.21573200 | 2.42401400  |
| H | -8.41947300 | -0.76128700 | 1.04271900  |

#### M5SS

|   |             |             |             |
|---|-------------|-------------|-------------|
| C | -0.81174800 | -0.14758400 | -1.13034400 |
| O | -0.05696400 | 0.05820900  | -2.14093800 |
| C | -1.06579400 | 0.65809100  | -0.06029500 |
| C | -0.36366800 | 1.98754500  | 0.01044900  |
| H | -1.72009400 | 0.34334500  | 0.74528000  |
| H | -0.44438000 | 2.43158900  | -0.99264600 |
| C | -1.04418100 | 2.96687000  | 0.95605800  |
| C | -2.44308200 | 3.04105600  | 0.90820800  |
| C | -0.36432300 | 3.81729400  | 1.83183400  |
| C | -3.14136500 | 3.93969900  | 1.70609400  |
| H | -2.98511800 | 2.37965700  | 0.23556300  |
| C | -1.06563900 | 4.71776700  | 2.63408300  |

|   |             |             |             |
|---|-------------|-------------|-------------|
| H | 0.71632100  | 3.76733600  | 1.91469100  |
| C | -2.45336600 | 4.78565600  | 2.57455500  |
| H | -4.22541800 | 3.97793700  | 1.64932700  |
| H | -0.51731700 | 5.36470000  | 3.31159300  |
| H | -2.99477800 | 5.48725200  | 3.20100300  |
| C | 0.88865400  | 0.89050200  | 2.50424500  |
| C | 1.60088300  | 0.08087600  | 3.37922600  |
| C | 2.74803300  | -0.34470600 | 2.70252500  |
| C | 2.71315300  | 0.22359400  | 1.42896100  |
| N | 1.55514300  | 0.97944200  | 1.33079600  |
| H | -0.05458900 | 1.39479100  | 2.64476400  |
| H | 1.30406900  | -0.17086000 | 4.38606900  |
| H | 3.52286800  | -0.99761600 | 3.07546500  |
| C | 3.66682300  | 0.09466600  | 0.35476600  |
| O | 3.65178700  | 0.66913600  | -0.71915000 |
| C | 4.79525800  | -0.93508700 | 0.59576900  |
| F | 5.49130100  | -0.66649600 | 1.70859900  |
| F | 4.27831200  | -2.16807300 | 0.73191800  |
| F | 5.64108500  | -0.95473200 | -0.42664100 |
| C | 1.16291700  | 1.72443000  | 0.13603600  |
| H | 1.36925100  | 1.07010400  | -0.71584700 |
| C | 2.06605700  | 2.94662900  | -0.04648900 |
| O | 2.75637600  | 3.36017900  | 0.86414000  |
| C | 2.06946200  | 3.60920800  | -1.38670400 |
| C | 2.63240200  | 4.88727200  | -1.46831800 |
| C | 1.56272900  | 2.99399000  | -2.53828400 |
| C | 2.68034600  | 5.55489500  | -2.68455800 |
| H | 3.02797900  | 5.33619400  | -0.56328100 |
| C | 1.62165900  | 3.66684100  | -3.75632900 |
| H | 1.12677500  | 1.99662100  | -2.50149800 |
| C | 2.17431700  | 4.94279200  | -3.83120400 |
| H | 3.11223200  | 6.54865200  | -2.74237900 |
| H | 1.23505500  | 3.18869800  | -4.65027600 |
| H | 2.21352100  | 5.46132900  | -4.78415300 |
| C | -1.85809100 | -3.60374500 | -1.52882900 |
| C | -1.55013700 | -4.97212700 | -2.05635300 |
| C | 0.65624200  | -4.32398700 | -2.35820300 |
| C | 0.50410700  | -2.83872600 | -1.99681400 |
| C | -1.46887300 | -1.49398400 | -1.12606400 |
| H | -1.27973000 | -5.64743700 | -1.23225000 |
| H | 0.87918800  | -4.90746500 | -1.45526200 |
| H | 0.63504100  | -2.19562500 | -2.86834400 |
| N | -2.99162800 | -3.13794400 | -1.09023000 |
| N | -2.72997700 | -1.82082600 | -0.84029600 |

|   |             |             |             |
|---|-------------|-------------|-------------|
| N | -0.89389800 | -2.63205100 | -1.55853800 |
| H | 1.48578300  | -4.42885900 | -3.05930700 |
| H | -2.42392400 | -5.37055600 | -2.57285500 |
| O | -0.49690700 | -4.85476800 | -2.98470400 |
| C | 1.51547700  | -2.41159900 | -0.91256500 |
| H | 2.50977700  | -2.66064500 | -1.30154200 |
| H | 1.47099700  | -1.32137800 | -0.83389800 |
| C | 1.30354100  | -3.06008900 | 0.43553400  |
| C | 1.93377400  | -4.26360000 | 0.77102200  |
| C | 0.47116700  | -2.45811800 | 1.38311000  |
| C | 1.70894400  | -4.86951200 | 2.00372100  |
| H | 2.62702900  | -4.71856300 | 0.06724500  |
| C | 0.24604400  | -3.06048600 | 2.61896800  |
| H | 0.03803300  | -1.48238600 | 1.16760100  |
| C | 0.85454500  | -4.27329000 | 2.92901900  |
| H | 2.21081600  | -5.80071400 | 2.24625600  |
| H | -0.38815800 | -2.56448400 | 3.34797500  |
| H | 0.68265300  | -4.74130900 | 3.89288800  |
| C | -3.76382500 | -0.93324800 | -0.38303200 |
| C | -4.28791300 | -0.00550400 | -1.28486000 |
| C | -4.15077700 | -1.01339300 | 0.95545100  |
| C | -5.24639300 | 0.88044700  | -0.79409100 |
| C | -5.10889700 | -0.10318600 | 1.39655700  |
| C | -5.66375200 | 0.84849400  | 0.53826700  |
| H | -5.67118800 | 1.61888100  | -1.46921400 |
| H | -5.42116700 | -0.13159500 | 2.43730100  |
| C | -3.81714000 | 0.04728900  | -2.71392000 |
| H | -2.78375900 | 0.40566000  | -2.77925000 |
| H | -3.85218500 | -0.94446500 | -3.17522600 |
| H | -4.44814100 | 0.71901900  | -3.29751200 |
| C | -6.71022700 | 1.81020700  | 1.03843800  |
| H | -6.52732400 | 2.08289300  | 2.08051100  |
| H | -6.72674100 | 2.72294400  | 0.43871100  |
| H | -7.70617700 | 1.35900000  | 0.98479100  |
| C | -3.53104600 | -2.03067700 | 1.87570500  |
| H | -3.84782800 | -3.04317700 | 1.60860200  |
| H | -2.43747300 | -2.01021600 | 1.80862200  |
| H | -3.81778400 | -1.83871000 | 2.91060300  |

**TS5RR**

|   |            |             |             |
|---|------------|-------------|-------------|
| C | 3.76348200 | -1.31849700 | 0.56979900  |
| C | 5.09912000 | -1.78525300 | 0.08778500  |
| C | 4.70411000 | -0.86755500 | -2.00833300 |
| C | 3.38238300 | -0.14625100 | -1.63896000 |

|   |             |             |             |
|---|-------------|-------------|-------------|
| C | 1.78878800  | -0.47256700 | 0.30776500  |
| H | 5.86925500  | -1.02024300 | 0.26124700  |
| H | 5.54614700  | -0.18157100 | -1.85043200 |
| H | 2.54895400  | -0.45207300 | -2.28095400 |
| N | 3.11346700  | -1.65158100 | 1.65121500  |
| N | 1.88153900  | -1.10420600 | 1.47224600  |
| N | 2.99063200  | -0.56618400 | -0.27317000 |
| H | 4.66383000  | -1.13757900 | -3.06412400 |
| H | 5.37467100  | -2.70664300 | 0.60042900  |
| O | 4.94623500  | -2.05902400 | -1.28808200 |
| C | 3.56219200  | 1.38382000  | -1.74374500 |
| H | 4.05429900  | 1.56851300  | -2.70529100 |
| H | 2.57113400  | 1.83639500  | -1.78598500 |
| C | 4.36892900  | 1.96867400  | -0.60884300 |
| C | 5.75099400  | 2.15726900  | -0.70051200 |
| C | 3.72727000  | 2.30574300  | 0.58975900  |
| C | 6.47990200  | 2.63814200  | 0.38626100  |
| H | 6.26174400  | 1.94561300  | -1.63670000 |
| C | 4.45227100  | 2.78559700  | 1.67625000  |
| H | 2.64570400  | 2.20749800  | 0.64672900  |
| C | 5.83387400  | 2.94452500  | 1.58033000  |
| H | 7.55182700  | 2.78087300  | 0.29465900  |
| H | 3.93719200  | 3.04766800  | 2.59579100  |
| H | 6.40044900  | 3.31993000  | 2.42612100  |
| C | 0.80338000  | -1.25142400 | 2.41535000  |
| C | 0.21028900  | -2.51397400 | 2.53340800  |
| C | 0.32328900  | -0.10986000 | 3.05949400  |
| C | -0.93385900 | -2.60221700 | 3.31966300  |
| C | -0.82819500 | -0.25751700 | 3.83412300  |
| C | -1.47353100 | -1.48566500 | 3.96534600  |
| H | -1.43241400 | -3.56361700 | 3.41214400  |
| H | -1.23326300 | 0.61546300  | 4.33943700  |
| C | 0.76288600  | -3.70915400 | 1.80378900  |
| H | 0.07863400  | -4.55396100 | 1.89084700  |
| H | 0.90642500  | -3.49653700 | 0.74040300  |
| H | 1.73346300  | -4.00240300 | 2.21331100  |
| C | -2.71532500 | -1.62204400 | 4.80490000  |
| H | -2.47363800 | -2.05204300 | 5.78234100  |
| H | -3.18935200 | -0.65188400 | 4.96677800  |
| H | -3.44038800 | -2.27719600 | 4.31653900  |
| C | 0.99404700  | 1.23362600  | 2.92210300  |
| H | 2.07956600  | 1.13303700  | 2.83007500  |
| H | 0.63120400  | 1.77482200  | 2.04072400  |
| H | 0.78065300  | 1.84789600  | 3.79854000  |

|   |             |             |             |
|---|-------------|-------------|-------------|
| C | 0.55665800  | 0.22597700  | -0.20774700 |
| O | 0.70227700  | 1.39862000  | -0.53957200 |
| C | -0.64551700 | -0.53849900 | -0.37269900 |
| C | -1.88965800 | 0.34129900  | -0.20136200 |
| H | -0.68233200 | -1.45905700 | 0.20665500  |
| H | -1.59524400 | 1.21669400  | 0.38947900  |
| C | -3.00782100 | -0.35498600 | 0.54344400  |
| C | -3.36894800 | -1.67657100 | 0.26437000  |
| C | -3.70302500 | 0.33862100  | 1.53824000  |
| C | -4.39870600 | -2.28917900 | 0.97395200  |
| H | -2.84121400 | -2.22930200 | -0.50976200 |
| C | -4.73545900 | -0.27129900 | 2.24495400  |
| H | -3.43005800 | 1.36889700  | 1.75835100  |
| C | -5.08463900 | -1.59037700 | 1.96488500  |
| H | -4.66982700 | -3.31501700 | 0.74518200  |
| H | -5.26479000 | 0.28200100  | 3.01470900  |
| H | -5.88846400 | -2.07013500 | 2.51480700  |
| C | -3.98707800 | -0.59450900 | -2.91737700 |
| C | -3.83796100 | -1.83341200 | -3.49418700 |
| C | -2.48695200 | -2.22926700 | -3.32405400 |
| C | -1.84776000 | -1.20770300 | -2.65378700 |
| N | -2.76394700 | -0.20836600 | -2.42130900 |
| H | -4.85056400 | 0.03623200  | -2.81618600 |
| H | -4.61979000 | -2.38886200 | -3.99132700 |
| H | -2.02735500 | -3.14683300 | -3.65925200 |
| C | -0.41580900 | -1.05148800 | -2.20982600 |
| O | 0.34599900  | -0.22523100 | -2.81004200 |
| C | 0.18990900  | -2.46214200 | -2.02281400 |
| F | 0.37161500  | -3.05485200 | -3.20978500 |
| F | -0.55260600 | -3.29742800 | -1.27288200 |
| F | 1.40961200  | -2.41700900 | -1.43369400 |
| C | -2.36370700 | 0.90651100  | -1.58329400 |
| H | -1.48433200 | 1.36074400  | -2.05240000 |
| C | -3.42353900 | 1.97130000  | -1.34713300 |
| O | -4.60900700 | 1.76196300  | -1.50790300 |
| C | -2.96524000 | 3.30142700  | -0.81848000 |
| C | -3.96115800 | 4.19758100  | -0.41218700 |
| C | -1.61986800 | 3.67359900  | -0.71993200 |
| C | -3.62065200 | 5.44825700  | 0.08489500  |
| H | -4.99760300 | 3.88974900  | -0.49813800 |
| C | -1.28320500 | 4.92945900  | -0.22059000 |
| H | -0.82680500 | 2.99382400  | -1.01320900 |
| C | -2.27853900 | 5.81641700  | 0.18032300  |
| H | -4.39809400 | 6.13771800  | 0.39719500  |

|   |             |            |             |
|---|-------------|------------|-------------|
| H | -0.23845800 | 5.21347700 | -0.14839200 |
| H | -2.01035400 | 6.79463900 | 0.56685400  |

**TS5RS**

|   |             |             |             |
|---|-------------|-------------|-------------|
| C | -0.51760800 | -0.32456200 | -1.12253500 |
| O | -0.46793900 | -1.18154300 | -1.99451800 |
| C | 0.52051600  | -0.01407400 | -0.16704000 |
| C | 1.90163400  | -0.44038200 | -0.64101100 |
| H | 0.46534500  | 0.98319700  | 0.25655000  |
| H | 1.78775900  | -0.83950400 | -1.65562500 |
| C | 2.86320800  | 0.73196800  | -0.67654700 |
| C | 3.05015200  | 1.53996100  | 0.45123400  |
| C | 3.59870600  | 1.00867700  | -1.83057500 |
| C | 3.96066300  | 2.59143000  | 0.42567500  |
| H | 2.47866900  | 1.34486300  | 1.35526100  |
| C | 4.50276500  | 2.06920100  | -1.86204100 |
| H | 3.46668300  | 0.38012100  | -2.70802600 |
| C | 4.68858800  | 2.86142700  | -0.73256900 |
| H | 4.09995600  | 3.20381400  | 1.31160600  |
| H | 5.06631800  | 2.27012100  | -2.76756600 |
| H | 5.39816700  | 3.68261500  | -0.75237400 |
| C | 1.65296400  | -4.00882000 | 0.26296400  |
| C | 0.49424100  | -4.61794800 | 0.68182600  |
| C | -0.38383100 | -3.59605700 | 1.11956600  |
| C | 0.27220800  | -2.39494400 | 0.96734100  |
| N | 1.52172200  | -2.65179800 | 0.42785800  |
| H | 2.54795300  | -4.43325200 | -0.16074800 |
| H | 0.30555900  | -5.68132600 | 0.66533000  |
| H | -1.38123000 | -3.69409600 | 1.52295700  |
| C | -0.28517900 | -1.04409500 | 1.28149900  |
| O | -1.55863100 | -0.90256500 | 1.29079000  |
| C | 0.33888000  | -0.37010300 | 2.52105500  |
| F | -0.15934600 | -0.92722400 | 3.62911500  |
| F | 1.68446200  | -0.46633900 | 2.61702000  |
| F | 0.06002900  | 0.94455700  | 2.57511100  |
| C | 2.52325000  | -1.62523100 | 0.16369200  |
| H | 2.89694700  | -1.25996800 | 1.11541700  |
| C | 3.68443300  | -2.15694300 | -0.68476200 |
| O | 3.44582200  | -2.79418600 | -1.69196300 |
| C | 5.09576500  | -1.81934000 | -0.31542100 |
| C | 6.10478300  | -2.35168300 | -1.12846900 |
| C | 5.44628400  | -0.99389900 | 0.75849800  |
| C | 7.43888300  | -2.07075900 | -0.87118300 |
| H | 5.81463900  | -2.98437200 | -1.96010400 |



|   |             |             |             |
|---|-------------|-------------|-------------|
| C | 6.78470900  | -0.70433400 | 1.00768900  |
| H | 4.69089300  | -0.55115200 | 1.39698400  |
| C | 7.78070300  | -1.24315200 | 0.19844200  |
| H | 8.21363200  | -2.49164500 | -1.50343600 |
| H | 7.04732500  | -0.05626000 | 1.83698400  |
| H | 8.82327900  | -1.01794300 | 0.39932600  |
| C | -3.93227900 | 0.91451600  | -1.39476300 |
| C | -5.36046400 | 0.72953500  | -1.81945800 |
| C | -4.53190300 | -1.29865200 | -2.82216100 |
| C | -3.43704300 | -1.48147100 | -1.77070400 |
| C | -1.84661500 | 0.39939900  | -1.03278700 |
| H | -6.00840000 | 0.86673900  | -0.94607000 |
| H | -4.93145200 | -2.27529500 | -3.10217500 |
| H | -2.57059200 | -1.95795600 | -2.22916200 |
| N | -3.36692900 | 2.03382200  | -1.03056600 |
| N | -2.07016200 | 1.69080900  | -0.80533600 |
| N | -3.02908800 | -0.10680300 | -1.42301000 |
| H | -4.09843200 | -0.82683700 | -3.71610900 |
| H | -5.59252100 | 1.50504300  | -2.56016600 |
| O | -5.63081900 | -0.55543600 | -2.33644400 |
| C | -3.83619500 | -2.25440100 | -0.49683900 |
| H | -4.12705300 | -3.25936300 | -0.82090600 |
| H | -2.92991600 | -2.32888300 | 0.11305400  |
| C | -4.94078500 | -1.61417500 | 0.31490200  |
| C | -6.28017200 | -1.96404600 | 0.12051300  |
| C | -4.63107700 | -0.62461900 | 1.25427400  |
| C | -7.29326600 | -1.31746100 | 0.81954300  |
| H | -6.53053900 | -2.73413100 | -0.60477800 |
| C | -5.64692600 | 0.02816600  | 1.95297700  |
| H | -3.58576900 | -0.39273500 | 1.44401900  |
| C | -6.97927800 | -0.30958400 | 1.73243600  |
| H | -8.32870000 | -1.59687100 | 0.65228200  |
| H | -5.39161800 | 0.79516100  | 2.67813400  |
| H | -7.76990600 | 0.19722700  | 2.27678700  |
| C | -1.11829800 | 2.67962400  | -0.37212500 |
| C | -0.11874500 | 3.09087900  | -1.25521200 |
| C | -1.20687200 | 3.10290100  | 0.95718400  |
| C | 0.84085200  | 3.96981400  | -0.75553600 |
| C | -0.22882800 | 3.98977200  | 1.39956100  |
| C | 0.80020000  | 4.42736900  | 0.56124900  |
| H | 1.65577700  | 4.27978700  | -1.40526900 |
| H | -0.25736800 | 4.32656800  | 2.43274600  |
| C | -0.01457300 | 2.55645100  | -2.65905900 |
| H | 0.56442000  | 1.62473900  | -2.67506100 |

|   |             |            |             |
|---|-------------|------------|-------------|
| H | -0.99559800 | 2.35524500 | -3.09724300 |
| H | 0.50558300  | 3.27298100 | -3.29698500 |
| C | 1.84678300  | 5.38261500 | 1.07123400  |
| H | 2.74032500  | 5.35472700 | 0.44363500  |
| H | 1.46533700  | 6.40873000 | 1.07275100  |
| H | 2.13528900  | 5.13744900 | 2.09673200  |
| C | -2.27185300 | 2.55369900 | 1.86757900  |
| H | -3.27039100 | 2.84510400 | 1.52937100  |
| H | -2.21498500 | 1.45851700 | 1.87892200  |
| H | -2.12424600 | 2.91751600 | 2.88538100  |

**TS5SR**

|   |             |             |             |
|---|-------------|-------------|-------------|
| C | -3.68044100 | -0.73476400 | 1.63488900  |
| C | -4.98981300 | -0.48123200 | 2.31703800  |
| C | -5.28456900 | 1.37243200  | 0.98297300  |
| C | -3.92151800 | 1.36343200  | 0.27826100  |
| C | -1.94985000 | -0.30406300 | 0.38518700  |
| H | -5.79739900 | -1.02383300 | 1.80515000  |
| H | -6.00895500 | 0.76976500  | 0.41893000  |
| H | -3.29118100 | 2.18400600  | 0.62199700  |
| N | -2.83596400 | -1.68725100 | 1.89867400  |
| N | -1.76668400 | -1.40906400 | 1.10701200  |
| N | -3.19549100 | 0.12476700  | 0.68246100  |
| H | -5.63567600 | 2.40539900  | 1.01469600  |
| H | -4.92570000 | -0.82581400 | 3.34957500  |
| O | -5.22646300 | 0.90426900  | 2.31641500  |
| C | -4.09618800 | 1.48404900  | -1.24578800 |
| H | -4.65635600 | 2.41309600  | -1.40306500 |
| H | -3.10741700 | 1.62138600  | -1.68525700 |
| C | -4.82535800 | 0.32259700  | -1.88222900 |
| C | -6.20832400 | 0.35677400  | -2.08915400 |
| C | -4.12274000 | -0.82472500 | -2.26709800 |
| C | -6.87846000 | -0.73435000 | -2.63744400 |
| H | -6.76575800 | 1.25318900  | -1.82641100 |
| C | -4.79063800 | -1.91857300 | -2.81212700 |
| H | -3.04100000 | -0.82847400 | -2.16989400 |
| C | -6.17146200 | -1.88025500 | -2.99267400 |
| H | -7.95163200 | -0.68578900 | -2.79242600 |
| H | -4.22704900 | -2.79803000 | -3.11014800 |
| H | -6.69126600 | -2.73108000 | -3.42115400 |
| C | -0.65979500 | -2.33186900 | 1.10542700  |
| C | -0.45148500 | -3.13698700 | -0.01964400 |
| C | 0.08249000  | -2.44717900 | 2.28297800  |
| C | 0.54508200  | -4.10459000 | 0.07375800  |

|   |             |             |             |
|---|-------------|-------------|-------------|
| C | 1.06520400  | -3.43518500 | 2.32087200  |
| C | 1.29793500  | -4.27866700 | 1.23541200  |
| H | 0.73874200  | -4.73947100 | -0.78709100 |
| H | 1.66075000  | -3.54617600 | 3.22361700  |
| C | -1.26495900 | -2.98336100 | -1.27728000 |
| H | -2.32932100 | -2.85298500 | -1.05455000 |
| H | -0.93525500 | -2.11359500 | -1.85558000 |
| H | -1.15416200 | -3.86845200 | -1.90568800 |
| C | 2.34299700  | -5.36042500 | 1.30261200  |
| H | 1.87756900  | -6.33928800 | 1.45511800  |
| H | 2.91162200  | -5.40598100 | 0.36973700  |
| H | 3.04023900  | -5.18930100 | 2.12588100  |
| C | -0.17310100 | -1.55087400 | 3.46615400  |
| H | -0.28334200 | -0.50405600 | 3.16602500  |
| H | -1.09558900 | -1.83802000 | 3.97906800  |
| H | 0.65117200  | -1.62083900 | 4.17759000  |
| C | -0.89124200 | 0.25346000  | -0.56782100 |
| O | -1.22063400 | 0.40864400  | -1.74555400 |
| C | 0.32109500  | 0.63274600  | 0.04514700  |
| C | 1.54160000  | 0.70293700  | -0.83715700 |
| H | 0.49545200  | 0.23529200  | 1.04260700  |
| H | 1.24420400  | 1.07230400  | -1.82448300 |
| C | 2.19033500  | -0.66396000 | -1.00310400 |
| C | 2.78774100  | -1.30813200 | 0.08561800  |
| C | 2.28334600  | -1.25235600 | -2.26573300 |
| C | 3.51446700  | -2.47907500 | -0.09507700 |
| H | 2.71188000  | -0.87568400 | 1.08139200  |
| C | 2.98426000  | -2.44422400 | -2.44383000 |
| H | 1.82355800  | -0.75542500 | -3.11563400 |
| C | 3.61895900  | -3.04975600 | -1.36224500 |
| H | 3.99891300  | -2.94851000 | 0.75653300  |
| H | 3.05346900  | -2.88500200 | -3.43350600 |
| H | 4.19270600  | -3.96062500 | -1.50553500 |
| C | 2.83463400  | 4.16172600  | -0.76737100 |
| C | 1.99798100  | 5.24939100  | -0.84795800 |
| C | 0.70048400  | 4.79940500  | -0.51051200 |
| C | 0.79038700  | 3.45429300  | -0.21621100 |
| N | 2.10317300  | 3.06797400  | -0.37906500 |
| H | 3.88529900  | 4.07283500  | -0.99534000 |
| H | 2.29236300  | 6.24965800  | -1.12887500 |
| H | -0.21277300 | 5.37267800  | -0.44989000 |
| C | -0.35073200 | 2.67369200  | 0.33836700  |
| O | -1.48518100 | 2.88539100  | -0.13145500 |
| C | -0.30215200 | 2.50937400  | 1.86668100  |

|   |             |             |             |
|---|-------------|-------------|-------------|
| F | -0.62714200 | 3.66881600  | 2.45236600  |
| F | 0.90030900  | 2.15098300  | 2.34977800  |
| F | -1.19819000 | 1.59476100  | 2.30185100  |
| C | 2.59996200  | 1.70494900  | -0.30227000 |
| H | 2.83337000  | 1.45298600  | 0.73694900  |
| C | 3.83708700  | 1.52536400  | -1.20372100 |
| O | 3.77885200  | 1.85259900  | -2.37002400 |
| C | 5.03609000  | 0.82984900  | -0.65197400 |
| C | 5.79321700  | 0.05493200  | -1.53545900 |
| C | 5.40411500  | 0.91409400  | 0.69344300  |
| C | 6.89391400  | -0.65302100 | -1.07080500 |
| H | 5.48452600  | 0.00202900  | -2.57436600 |
| C | 6.52225400  | 0.22362900  | 1.15070700  |
| H | 4.83543100  | 1.53084800  | 1.38288400  |
| C | 7.25889000  | -0.56851900 | 0.27272000  |
| H | 7.46852300  | -1.27141400 | -1.75243300 |
| H | 6.81622900  | 0.30039300  | 2.19219300  |
| H | 8.12099700  | -1.11916400 | 0.63543100  |

**TS5SS**

|   |             |             |             |
|---|-------------|-------------|-------------|
| C | 0.28243400  | 0.65238100  | -0.49059200 |
| O | 0.23217800  | 1.86375200  | -0.67477500 |
| C | -0.69372000 | -0.07844300 | 0.28007100  |
| C | -2.10712000 | 0.47986300  | 0.02396500  |
| H | -0.64527600 | -1.15920500 | 0.18505600  |
| H | -2.04780000 | 1.14684600  | -0.84219700 |
| C | -3.10054100 | -0.61458900 | -0.30434200 |
| C | -3.90490400 | -0.49175200 | -1.44038100 |
| C | -3.23480200 | -1.75319200 | 0.49915900  |
| C | -4.81926800 | -1.48681100 | -1.78073800 |
| H | -3.81345500 | 0.39553900  | -2.06392300 |
| C | -4.15175700 | -2.74410000 | 0.16278300  |
| H | -2.61406400 | -1.86750700 | 1.38601600  |
| C | -4.94284800 | -2.61790300 | -0.97860100 |
| H | -5.43457600 | -1.37528400 | -2.66808100 |
| H | -4.24955600 | -3.62041900 | 0.79635300  |
| H | -5.65599200 | -3.39506400 | -1.23646800 |
| C | -3.64267700 | 0.09736300  | 3.19726800  |
| C | -3.10213900 | -0.80392200 | 4.08502000  |
| C | -1.71146200 | -0.90209500 | 3.81241300  |
| C | -1.44621100 | -0.04213500 | 2.76850400  |
| N | -2.62095600 | 0.57159800  | 2.40906700  |
| H | -4.65269100 | 0.43714800  | 3.05788600  |
| H | -3.65061800 | -1.32805500 | 4.85419400  |

|   |             |             |             |
|---|-------------|-------------|-------------|
| H | -0.98513300 | -1.51517000 | 4.32517400  |
| C | -0.18642500 | 0.31563700  | 2.01523000  |
| O | 0.27367300  | 1.50452200  | 2.09914100  |
| C | 0.86604500  | -0.78051500 | 2.27226100  |
| F | 1.30630800  | -0.74389600 | 3.53294100  |
| F | 0.44641400  | -2.03886300 | 2.03663600  |
| F | 1.95201200  | -0.59426700 | 1.47765600  |
| C | -2.59497600 | 1.38044100  | 1.20638400  |
| H | -1.81896700 | 2.13774200  | 1.35809000  |
| C | -3.89625300 | 2.05853700  | 0.82759600  |
| O | -4.97238400 | 1.72089200  | 1.27860500  |
| C | -3.81756200 | 3.15709600  | -0.19480100 |
| C | -5.02905400 | 3.63787200  | -0.70428800 |
| C | -2.61144300 | 3.71236300  | -0.63938200 |
| C | -5.04013300 | 4.65941800  | -1.64443700 |
| H | -5.95090900 | 3.19419600  | -0.34397400 |
| C | -2.62816500 | 4.73806100  | -1.58102600 |
| H | -1.65516100 | 3.35116700  | -0.27210500 |
| C | -3.83719000 | 5.21246000  | -2.08297500 |
| H | -5.98327100 | 5.02708800  | -2.03511100 |
| H | -1.69167300 | 5.16826700  | -1.92006900 |
| H | -3.84340400 | 6.01344200  | -2.81552500 |
| C | 3.44956600  | -0.31209400 | -2.01061600 |
| C | 4.79970600  | 0.07248100  | -2.54374700 |
| C | 4.25100200  | 2.29117300  | -1.98899700 |
| C | 3.08636500  | 1.97814600  | -1.04460900 |
| C | 1.49714900  | -0.02798600 | -1.08415500 |
| H | 5.52801800  | -0.69942700 | -2.28926300 |
| H | 4.74026800  | 3.20767600  | -1.65342500 |
| H | 2.24036900  | 2.62094600  | -1.28275700 |
| N | 2.83948500  | -1.45784000 | -2.14765000 |
| N | 1.62473800  | -1.26329400 | -1.56796400 |
| N | 2.65438200  | 0.59771000  | -1.37425800 |
| H | 3.87242700  | 2.44503900  | -3.01020100 |
| H | 4.72737900  | 0.14487600  | -3.63919600 |
| O | 5.23950600  | 1.27949400  | -1.97981100 |
| C | 3.40289700  | 2.10754700  | 0.45745300  |
| H | 3.42831400  | 3.18201400  | 0.66590500  |
| H | 2.55612200  | 1.70477500  | 1.02864700  |
| C | 4.72589000  | 1.49194900  | 0.84995600  |
| C | 5.84156500  | 2.31081400  | 1.03721200  |
| C | 4.88978400  | 0.10725500  | 0.96502500  |
| C | 7.09336000  | 1.76686200  | 1.31210500  |
| H | 5.72742500  | 3.38977500  | 0.96575500  |

|   |             |             |             |
|---|-------------|-------------|-------------|
| C | 6.14062100  | -0.44060200 | 1.23276100  |
| H | 4.03310700  | -0.54934900 | 0.85838600  |
| C | 7.24856500  | 0.38691200  | 1.40189300  |
| H | 7.94669300  | 2.42196100  | 1.45602600  |
| H | 6.24803200  | -1.51741700 | 1.31995000  |
| H | 8.22284800  | -0.04110300 | 1.61432500  |
| C | 0.64501000  | -2.32057300 | -1.55279000 |
| C | -0.52351200 | -2.16054500 | -2.30209400 |
| C | 0.89929000  | -3.43415700 | -0.74521900 |
| C | -1.49372800 | -3.15495800 | -2.18510500 |
| C | -0.10055700 | -4.40009900 | -0.67453900 |
| C | -1.30310600 | -4.27235100 | -1.37413800 |
| H | -2.43137200 | -3.03684700 | -2.72254900 |
| H | 0.06009500  | -5.27092900 | -0.04398800 |
| C | -0.76100600 | -0.95680100 | -3.17529900 |
| H | -1.12961700 | -0.10564400 | -2.59139900 |
| H | 0.15098600  | -0.64415100 | -3.69184100 |
| H | -1.51969800 | -1.18470100 | -3.92569400 |
| C | -2.36220400 | -5.33641800 | -1.26108100 |
| H | -2.56361900 | -5.57269100 | -0.21262100 |
| H | -3.29592800 | -5.01139500 | -1.72354100 |
| H | -2.03592400 | -6.25949500 | -1.75035000 |
| C | 2.19156400  | -3.58870800 | 0.01074700  |
| H | 2.10388200  | -4.39265100 | 0.74274200  |
| H | 3.01233500  | -3.82639500 | -0.67185400 |
| H | 2.45216400  | -2.67214900 | 0.54377000  |

#### M6RR

|   |            |             |             |
|---|------------|-------------|-------------|
| C | 3.68178900 | 0.06337900  | 1.73870600  |
| C | 5.07323700 | -0.33955600 | 2.11606700  |
| C | 5.22665600 | -1.62464900 | 0.19508700  |
| C | 3.81300100 | -1.34143700 | -0.35381800 |
| C | 1.83225800 | -0.05194900 | 0.58945000  |
| H | 5.80570100 | 0.37351700  | 1.71165600  |
| H | 5.92973300 | -0.87545900 | -0.18957100 |
| H | 3.22465400 | -2.25827800 | -0.41275500 |
| N | 2.83992900 | 0.80371200  | 2.39782100  |
| N | 1.69676600 | 0.73542300  | 1.65546100  |
| N | 3.10797300 | -0.47108000 | 0.61163900  |
| H | 5.53984700 | -2.61084000 | -0.15089400 |
| H | 5.16323000 | -0.37187700 | 3.20206600  |
| O | 5.29092700 | -1.63658700 | 1.60762400  |
| C | 3.87543100 | -0.68712400 | -1.75006900 |
| H | 4.45873700 | -1.36528400 | -2.38371100 |

|   |             |             |             |
|---|-------------|-------------|-------------|
| H | 2.86008300  | -0.65684000 | -2.15369700 |
| C | 4.48338800  | 0.69671100  | -1.75098900 |
| C | 5.84630400  | 0.90153900  | -1.98786500 |
| C | 3.66915600  | 1.80738200  | -1.49910700 |
| C | 6.39399000  | 2.18168700  | -1.94195000 |
| H | 6.48368700  | 0.05308100  | -2.22662200 |
| C | 4.21745800  | 3.08686800  | -1.45079100 |
| H | 2.59608000  | 1.65666200  | -1.38110600 |
| C | 5.58125400  | 3.27752500  | -1.66368200 |
| H | 7.45330000  | 2.32233700  | -2.13176100 |
| H | 3.57241200  | 3.94004100  | -1.26082500 |
| H | 6.00576200  | 4.27571700  | -1.62946500 |
| C | 0.48081400  | 1.39041400  | 2.06227900  |
| C | -0.30768200 | 0.75767700  | 3.03105800  |
| C | 0.11703900  | 2.58739600  | 1.44090200  |
| C | -1.54971500 | 1.32066200  | 3.31047900  |
| C | -1.13632700 | 3.11191900  | 1.76257300  |
| C | -1.98521700 | 2.48583300  | 2.67421000  |
| H | -2.20154300 | 0.82790200  | 4.02734400  |
| H | -1.45726300 | 4.03003100  | 1.27628500  |
| C | 0.17026100  | -0.47627400 | 3.75177400  |
| H | -0.66662900 | -0.98148900 | 4.23666300  |
| H | 0.65830700  | -1.19010900 | 3.08145300  |
| H | 0.90256700  | -0.20707500 | 4.51928400  |
| C | -3.33850000 | 3.06819300  | 2.98753500  |
| H | -4.03687800 | 2.28503800  | 3.29231500  |
| H | -3.26906500 | 3.79366300  | 3.80446800  |
| H | -3.75362200 | 3.58465400  | 2.11782800  |
| C | 1.01777800  | 3.29156800  | 0.46477000  |
| H | 2.07139900  | 3.15678100  | 0.72724300  |
| H | 0.86839500  | 2.87217000  | -0.53419100 |
| H | 0.79781200  | 4.36136000  | 0.45590800  |
| C | 0.70809100  | -0.27637700 | -0.44692100 |
| O | 0.57765500  | 0.76164100  | -1.18952800 |
| C | -0.54526800 | -0.98159600 | 0.21958000  |
| C | -1.85701600 | -0.32371300 | -0.17527700 |
| H | -0.50497300 | -1.10663500 | 1.30167300  |
| H | -1.70096200 | 0.74872200  | -0.01467600 |
| C | -3.05476200 | -0.75354500 | 0.64760400  |
| C | -3.28639000 | -2.08795800 | 0.99128500  |
| C | -3.97590000 | 0.21540700  | 1.06011400  |
| C | -4.40930500 | -2.44070500 | 1.73713100  |
| H | -2.58813100 | -2.85936100 | 0.68045500  |
| C | -5.09992300 | -0.13602100 | 1.80128100  |

|   |             |             |             |
|---|-------------|-------------|-------------|
| H | -3.80195300 | 1.25677700  | 0.79600700  |
| C | -5.31834700 | -1.46844300 | 2.14453600  |
| H | -4.57372000 | -3.48158500 | 1.99699800  |
| H | -5.80504500 | 0.63063200  | 2.10871200  |
| H | -6.19285100 | -1.74706600 | 2.72376000  |
| C | -2.88357600 | -2.66493200 | -2.87047800 |
| C | -2.42107800 | -3.96093600 | -2.90203700 |
| C | -1.30087600 | -4.03637200 | -2.03983800 |
| C | -1.11516800 | -2.77919000 | -1.50741700 |
| N | -2.09684000 | -1.94530400 | -2.01031100 |
| H | -3.71645800 | -2.20616700 | -3.37213300 |
| H | -2.85222500 | -4.76544200 | -3.47905600 |
| H | -0.69881400 | -4.90566500 | -1.82156200 |
| C | -0.11072300 | -2.23665500 | -0.55517800 |
| O | 1.00725200  | -1.56214000 | -1.15503900 |
| C | 0.45776300  | -3.31844700 | 0.34917100  |
| F | 1.14801300  | -4.23535000 | -0.34139700 |
| F | -0.48213600 | -3.95321500 | 1.05705700  |
| F | 1.32552000  | -2.78094300 | 1.23915600  |
| C | -2.09538600 | -0.51797600 | -1.70504000 |
| H | -1.24054800 | -0.05796700 | -2.21188800 |
| C | -3.36300900 | 0.23239700  | -2.09008000 |
| O | -4.39907600 | -0.32804800 | -2.38241300 |
| C | -3.30453400 | 1.73261000  | -2.01054000 |
| C | -4.52475800 | 2.41588100  | -2.06462300 |
| C | -2.11125200 | 2.45087500  | -1.86028100 |
| C | -4.55896400 | 3.80046000  | -1.96318800 |
| H | -5.43532500 | 1.83724200  | -2.17857300 |
| C | -2.15291400 | 3.84030300  | -1.76609500 |
| H | -1.15063300 | 1.94188900  | -1.79846200 |
| C | -3.37025300 | 4.51534200  | -1.81327800 |
| H | -5.50862000 | 4.32397700  | -2.00089900 |
| H | -1.22619500 | 4.39541800  | -1.65531500 |
| H | -3.39462800 | 5.59791100  | -1.73603000 |

#### **M6RS**

|   |             |             |             |
|---|-------------|-------------|-------------|
| C | -0.83173100 | -0.60966600 | -1.00754300 |
| O | -0.64091000 | -0.78915800 | -2.24770400 |
| C | 0.39508000  | -0.59057700 | -0.00888700 |
| C | 1.76103000  | -0.59509300 | -0.68674600 |
| H | 0.31534500  | 0.17943500  | 0.76436400  |
| H | 1.59160200  | -0.84100800 | -1.74268700 |
| C | 2.53620000  | 0.70109300  | -0.58016400 |
| C | 2.87216000  | 1.22860400  | 0.67044600  |



|   |             |             |             |
|---|-------------|-------------|-------------|
| C | 3.07351200  | 1.29019700  | -1.72670700 |
| C | 3.76064100  | 2.29381800  | 0.77478800  |
| H | 2.45931700  | 0.78173800  | 1.57328400  |
| C | 3.94930500  | 2.36905900  | -1.62655500 |
| H | 2.82378400  | 0.87579700  | -2.70011300 |
| C | 4.30779400  | 2.86235700  | -0.37413700 |
| H | 4.03118900  | 2.67801700  | 1.75372700  |
| H | 4.36718800  | 2.81020100  | -2.52638900 |
| H | 5.01069000  | 3.68587100  | -0.29223400 |
| C | 2.47965100  | -4.22589700 | -0.60086600 |
| C | 1.46341100  | -5.14966200 | -0.50857600 |
| C | 0.29523600  | -4.46076000 | -0.09155600 |
| C | 0.64055100  | -3.13701900 | 0.05169500  |
| N | 1.96909500  | -3.00019100 | -0.26432900 |
| H | 3.50771500  | -4.33468700 | -0.90788200 |
| H | 1.55126200  | -6.20237400 | -0.73317600 |
| H | -0.69042200 | -4.86994500 | 0.07449000  |
| C | -0.15356800 | -1.94507700 | 0.47926100  |
| O | -1.38801700 | -1.81298100 | -0.20096500 |
| C | -0.38345000 | -1.98544100 | 1.98095600  |
| F | -1.06967900 | -3.06519400 | 2.36152400  |
| F | 0.79089300  | -1.98007700 | 2.63566500  |
| F | -1.07379300 | -0.91038600 | 2.41643100  |
| C | 2.65473500  | -1.73261200 | -0.11223300 |
| H | 2.82320400  | -1.53993600 | 0.95220200  |
| C | 3.98161300  | -1.69612400 | -0.87910900 |
| O | 4.01659700  | -2.05163400 | -2.03874700 |
| C | 5.17944300  | -1.10845200 | -0.20825400 |
| C | 6.11817200  | -0.46099700 | -1.01769200 |
| C | 5.39113100  | -1.18835400 | 1.17123100  |
| C | 7.24603300  | 0.11901800  | -0.45173700 |
| H | 5.93406800  | -0.41017800 | -2.08584300 |
| C | 6.53395700  | -0.62751200 | 1.73268300  |
| H | 4.68359200  | -1.70691200 | 1.81036400  |
| C | 7.45503000  | 0.03433600  | 0.92435900  |
| H | 7.96359400  | 0.63571600  | -1.08044000 |
| H | 6.70324700  | -0.70435700 | 2.80146800  |
| H | 8.33855300  | 0.48325900  | 1.36691100  |
| C | -3.90421500 | 1.35009700  | -1.19554100 |
| C | -5.30581300 | 1.45977700  | -1.72968000 |
| C | -4.79243400 | -0.56114100 | -2.86889200 |
| C | -3.76961400 | -1.04705500 | -1.84383600 |
| C | -1.95607300 | 0.42945800  | -0.82320000 |
| H | -5.98160300 | 1.76182700  | -0.92543100 |

|   |             |             |             |
|---|-------------|-------------|-------------|
| H | -5.31358900 | -1.41347900 | -3.30702800 |
| H | -2.94513500 | -1.56930200 | -2.33638700 |
| N | -3.17408700 | 2.30778000  | -0.70307300 |
| N | -1.96026800 | 1.71041000  | -0.47159200 |
| N | -3.19356000 | 0.18847500  | -1.29117200 |
| H | -4.28959800 | -0.00059800 | -3.66993000 |
| H | -5.31046900 | 2.23409900  | -2.50880900 |
| O | -5.78110500 | 0.23216200  | -2.23548400 |
| C | -4.38899300 | -1.92681300 | -0.72815400 |
| H | -5.12927300 | -2.57831900 | -1.20345500 |
| H | -3.58700800 | -2.55289200 | -0.33334300 |
| C | -5.01759500 | -1.15533200 | 0.41096900  |
| C | -6.38300100 | -0.86201100 | 0.44708600  |
| C | -4.20481600 | -0.70465700 | 1.45661600  |
| C | -6.92123200 | -0.11797400 | 1.49442700  |
| H | -7.02199100 | -1.20359200 | -0.36167200 |
| C | -4.73985400 | 0.04287900  | 2.50285800  |
| H | -3.14700800 | -0.95381200 | 1.44024800  |
| C | -6.10004400 | 0.34255500  | 2.52213700  |
| H | -7.98445800 | 0.10062300  | 1.50891700  |
| H | -4.09411000 | 0.37998300  | 3.30849800  |
| H | -6.52050800 | 0.92243800  | 3.33747800  |
| C | -0.87122900 | 2.52937700  | -0.01215100 |
| C | 0.03973500  | 3.00371000  | -0.95733000 |
| C | -0.84205600 | 2.88490900  | 1.33871700  |
| C | 1.01869700  | 3.88581000  | -0.50247400 |
| C | 0.16729800  | 3.75394500  | 1.74357600  |
| C | 1.09445400  | 4.27118700  | 0.83494900  |
| H | 1.74875300  | 4.26741500  | -1.21066400 |
| H | 0.22260900  | 4.04474300  | 2.78978200  |
| C | -0.05381800 | 2.59744300  | -2.40397500 |
| H | -0.00125400 | 1.50889900  | -2.52531500 |
| H | -1.00558200 | 2.92921400  | -2.83400100 |
| H | 0.75847500  | 3.05042800  | -2.97494100 |
| C | 2.14488100  | 5.24779900  | 1.29488600  |
| H | 2.95843800  | 5.31889300  | 0.56998200  |
| H | 1.71376100  | 6.24611400  | 1.42168200  |
| H | 2.56647400  | 4.94728700  | 2.25786400  |
| C | -1.87279300 | 2.34873800  | 2.29532100  |
| H | -2.87999000 | 2.65697700  | 1.99830100  |
| H | -1.86116900 | 1.25494500  | 2.30846300  |
| H | -1.68180100 | 2.70832500  | 3.30767100  |

**M6SR**

**S82/S123**

|   |             |             |             |
|---|-------------|-------------|-------------|
| C | 3.86819100  | 0.74263700  | 1.34064600  |
| C | 5.28254000  | 0.54979300  | 1.78928900  |
| C | 5.39674700  | -1.42523700 | 0.59268700  |
| C | 3.95923600  | -1.40612100 | 0.03340500  |
| C | 1.97380400  | 0.15324800  | 0.42958000  |
| H | 5.97981600  | 1.02625400  | 1.08529900  |
| H | 6.07353800  | -0.90996400 | -0.09975400 |
| H | 3.38594200  | -2.25567700 | 0.40539900  |
| N | 3.03366900  | 1.67603800  | 1.68410100  |
| N | 1.85540900  | 1.29805700  | 1.09772800  |
| N | 3.26743300  | -0.20443900 | 0.55364000  |
| H | 5.71341100  | -2.46542200 | 0.68450000  |
| H | 5.41409300  | 0.98726800  | 2.77912500  |
| O | 5.51398600  | -0.83807800 | 1.87418400  |
| C | 3.95988400  | -1.43251700 | -1.50938900 |
| H | 4.49062700  | -2.34617400 | -1.80136200 |
| H | 2.92492900  | -1.52482000 | -1.84929700 |
| C | 4.60993300  | -0.22016200 | -2.13684300 |
| C | 5.95762700  | -0.22145900 | -2.51040900 |
| C | 3.85783800  | 0.94306200  | -2.33798400 |
| C | 6.55306300  | 0.92066300  | -3.04107300 |
| H | 6.54491800  | -1.12978600 | -2.39425800 |
| C | 4.45363500  | 2.08635500  | -2.86514900 |
| H | 2.79315400  | 0.91705000  | -2.11377300 |
| C | 5.80355600  | 2.08201700  | -3.21048900 |
| H | 7.59979900  | 0.90011100  | -3.32750700 |
| H | 3.85554400  | 2.97971000  | -3.02057600 |
| H | 6.26533800  | 2.97281000  | -3.62422500 |
| C | 0.70649400  | 2.15106200  | 1.27622900  |
| C | 0.37652100  | 3.04145300  | 0.24871600  |
| C | 0.05827300  | 2.13690900  | 2.51537700  |
| C | -0.65743000 | 3.94075300  | 0.49581400  |
| C | -0.96919800 | 3.05954200  | 2.70715900  |
| C | -1.33134600 | 3.97095900  | 1.71615900  |
| H | -0.94292700 | 4.63618800  | -0.28908600 |
| H | -1.49010800 | 3.07081100  | 3.66146700  |
| C | 1.11196800  | 3.03464800  | -1.06191600 |
| H | 2.19516600  | 3.08754000  | -0.90229500 |
| H | 0.89969400  | 2.10507000  | -1.60189400 |
| H | 0.80941200  | 3.88831600  | -1.67088000 |
| C | -2.41335600 | 4.98894200  | 1.96175900  |
| H | -1.98225600 | 5.93415900  | 2.30727300  |
| H | -2.97032200 | 5.19251600  | 1.04364400  |
| H | -3.11597800 | 4.64545900  | 2.72481400  |

|   |             |             |             |
|---|-------------|-------------|-------------|
| C | 0.43086000  | 1.16459900  | 3.60435200  |
| H | -0.00475400 | 0.17632400  | 3.42494400  |
| H | 1.51266500  | 1.03350500  | 3.67739900  |
| H | 0.06072900  | 1.52153400  | 4.56695000  |
| C | 0.89780600  | -0.54747900 | -0.43028800 |
| O | 0.90272300  | -0.10301500 | -1.62262700 |
| C | -0.45882700 | -0.80738300 | 0.34825100  |
| C | -1.62996800 | -0.69500600 | -0.61800700 |
| H | -0.62971500 | -0.23526700 | 1.26508100  |
| H | -1.25063600 | -0.95288700 | -1.61252500 |
| C | -2.22594200 | 0.69552000  | -0.69023200 |
| C | -2.97035900 | 1.22003700  | 0.37021300  |
| C | -2.14240000 | 1.42108200  | -1.88065100 |
| C | -3.68177500 | 2.40553500  | 0.21755600  |
| H | -3.02980100 | 0.67985100  | 1.31321200  |
| C | -2.83144100 | 2.62311200  | -2.02615200 |
| H | -1.53849900 | 1.02447000  | -2.69170500 |
| C | -3.62280300 | 3.10514200  | -0.98571000 |
| H | -4.28418400 | 2.78261400  | 1.03893400  |
| H | -2.76588700 | 3.17180600  | -2.96070800 |
| H | -4.18635900 | 4.02540400  | -1.10896800 |
| C | -2.74296300 | -4.23717300 | -0.69356300 |
| C | -1.85339900 | -5.26797400 | -0.49784200 |
| C | -0.65428500 | -4.70195800 | 0.00296100  |
| C | -0.85105600 | -3.34119000 | 0.09220500  |
| N | -2.12767600 | -3.06664200 | -0.34246800 |
| H | -3.75105900 | -4.23884800 | -1.07868900 |
| H | -2.04309800 | -6.31071200 | -0.70466000 |
| H | 0.25694900  | -5.21971100 | 0.26171400  |
| C | 0.05310300  | -2.24309500 | 0.54713400  |
| O | 1.20507800  | -2.03735800 | -0.26309300 |
| C | 0.50389300  | -2.50261400 | 1.97844500  |
| F | 1.13737000  | -3.67318900 | 2.10853300  |
| F | -0.53374800 | -2.48911000 | 2.82807600  |
| F | 1.36819000  | -1.55412100 | 2.40325700  |
| C | -2.72308400 | -1.74396800 | -0.29753400 |
| H | -3.13530700 | -1.55944100 | 0.70055500  |
| C | -3.80685800 | -1.57406800 | -1.37269200 |
| O | -3.59878900 | -1.95493000 | -2.50454300 |
| C | -5.04036400 | -0.81241500 | -1.01705500 |
| C | -5.58396900 | 0.02713800  | -1.99314400 |
| C | -5.64288500 | -0.90125700 | 0.24070400  |
| C | -6.70576000 | 0.79373700  | -1.70374200 |
| H | -5.09698800 | 0.08389700  | -2.96121900 |

|   |             |             |             |
|---|-------------|-------------|-------------|
| C | -6.78354200 | -0.15459900 | 0.51756900  |
| H | -5.23940400 | -1.56537700 | 0.99932800  |
| C | -7.30700300 | 0.70143900  | -0.44911900 |
| H | -7.11310200 | 1.46285300  | -2.45440900 |
| H | -7.26072500 | -0.23645100 | 1.48845600  |
| H | -8.18651500 | 1.29651500  | -0.22485700 |

**M6SS**

|   |             |             |             |
|---|-------------|-------------|-------------|
| C | 0.33383800  | 0.80420700  | 0.22429600  |
| O | -0.07482400 | 2.00340300  | 0.00724700  |
| C | -0.66289000 | -0.41592600 | 0.29962800  |
| C | -2.11508800 | 0.03766000  | 0.20954000  |
| H | -0.48742200 | -1.24304900 | -0.38913200 |
| H | -2.15460600 | 0.73405800  | -0.63517900 |
| C | -3.10373500 | -1.08016400 | -0.05068600 |
| C | -4.14197500 | -0.87267700 | -0.96479700 |
| C | -3.02745800 | -2.30910900 | 0.61049300  |
| C | -5.09123700 | -1.86149000 | -1.20614200 |
| H | -4.20650300 | 0.08007200  | -1.48690300 |
| C | -3.97395200 | -3.30207200 | 0.36685700  |
| H | -2.22597400 | -2.49610800 | 1.31949500  |
| C | -5.01124000 | -3.08050700 | -0.53599400 |
| H | -5.89136800 | -1.68026800 | -1.91693400 |
| H | -3.90240100 | -4.25008700 | 0.89042800  |
| H | -5.74975300 | -3.85429700 | -0.71989500 |
| C | -2.99177700 | -0.05345800 | 3.82036600  |
| C | -2.29064200 | -0.84494500 | 4.70175800  |
| C | -1.07700700 | -1.21522700 | 4.07324800  |
| C | -1.07798600 | -0.63426700 | 2.82423400  |
| N | -2.25753800 | 0.06529500  | 2.66959100  |
| H | -3.95577700 | 0.41347200  | 3.91358500  |
| H | -2.62503600 | -1.13063800 | 5.68800100  |
| H | -0.29236100 | -1.83897600 | 4.47524700  |
| C | -0.09332700 | -0.64892800 | 1.71262900  |
| O | 0.75658600  | 0.50715700  | 1.63249900  |
| C | 0.80385200  | -1.87224300 | 1.77988800  |
| F | 1.61547400  | -1.84061600 | 2.84307400  |
| F | 0.11741100  | -3.01957100 | 1.81546100  |
| F | 1.60036200  | -1.93028400 | 0.68591000  |
| C | -2.48741800 | 0.87181800  | 1.47663300  |
| H | -1.79778400 | 1.72222600  | 1.49883200  |
| C | -3.91274900 | 1.38465000  | 1.31819300  |
| O | -4.84945300 | 0.89997600  | 1.91933700  |
| C | -4.13406000 | 2.48055900  | 0.31663500  |

|   |             |             |             |
|---|-------------|-------------|-------------|
| C | -5.46274400 | 2.80619800  | 0.01981500  |
| C | -3.09057300 | 3.16404200  | -0.32079200 |
| C | -5.75123100 | 3.80366600  | -0.90165900 |
| H | -6.25242500 | 2.26040700  | 0.52506000  |
| C | -3.38825600 | 4.16354700  | -1.24453100 |
| H | -2.04873800 | 2.92005100  | -0.12024800 |
| C | -4.71164500 | 4.48477300  | -1.53527300 |
| H | -6.78303700 | 4.05143500  | -1.12827200 |
| H | -2.57897200 | 4.69242000  | -1.73744900 |
| H | -4.93496700 | 5.26509400  | -2.25612200 |
| C | 3.49811400  | 1.15103100  | -1.57787600 |
| C | 4.81511400  | 1.85895100  | -1.71158300 |
| C | 3.93159500  | 3.27649300  | 0.02502100  |
| C | 3.10676700  | 2.15929200  | 0.66543900  |
| C | 1.59041900  | 0.60833700  | -0.65812400 |
| H | 5.62343000  | 1.11937300  | -1.68708300 |
| H | 4.32232800  | 3.93964500  | 0.79905800  |
| H | 2.17514600  | 2.56779800  | 1.06766400  |
| N | 2.91050100  | 0.39382900  | -2.46100200 |
| N | 1.72359200  | 0.06132500  | -1.86423300 |
| N | 2.72211600  | 1.30264800  | -0.46334600 |
| H | 3.28782000  | 3.85900000  | -0.64934700 |
| H | 4.83098100  | 2.37080600  | -2.68164100 |
| O | 5.06162300  | 2.76779200  | -0.65744300 |
| C | 3.83351200  | 1.33610800  | 1.74986000  |
| H | 4.18527400  | 2.04307100  | 2.50829200  |
| H | 3.07662600  | 0.69752400  | 2.21502800  |
| C | 4.97789400  | 0.49060200  | 1.23838100  |
| C | 6.29590400  | 0.95427500  | 1.25548300  |
| C | 4.72110500  | -0.77417700 | 0.70080700  |
| C | 7.32682900  | 0.18838400  | 0.72129200  |
| H | 6.50898200  | 1.93573800  | 1.66987100  |
| C | 5.74942900  | -1.54276700 | 0.15728700  |
| H | 3.70700800  | -1.16436900 | 0.72282600  |
| C | 7.05503700  | -1.05990700 | 0.16078800  |
| H | 8.34418300  | 0.56594500  | 0.73957100  |
| H | 5.52904300  | -2.52127700 | -0.25834700 |
| H | 7.85922500  | -1.65575900 | -0.25857600 |
| C | 0.75542700  | -0.80260100 | -2.48070600 |
| C | -0.42087600 | -0.21921500 | -2.97199100 |
| C | 0.96422100  | -2.18143700 | -2.42641300 |
| C | -1.45472500 | -1.08170400 | -3.32228900 |
| C | -0.10509600 | -2.99941000 | -2.79892200 |
| C | -1.32807100 | -2.46960200 | -3.20616900 |

|   |             |             |             |
|---|-------------|-------------|-------------|
| H | -2.39237100 | -0.66098200 | -3.67675400 |
| H | 0.01775800  | -4.07810200 | -2.74071000 |
| C | -0.56109100 | 1.27508300  | -3.10723900 |
| H | -0.49712600 | 1.77639500  | -2.13458900 |
| H | 0.23508000  | 1.67505800  | -3.74356100 |
| H | -1.52143100 | 1.52066700  | -3.56510200 |
| C | -2.50541200 | -3.36499500 | -3.48127500 |
| H | -3.12216200 | -3.44783500 | -2.57934200 |
| H | -3.13608400 | -2.95807500 | -4.27528200 |
| H | -2.18503300 | -4.36870900 | -3.76878800 |
| C | 2.27348300  | -2.79069700 | -1.99562500 |
| H | 2.81451000  | -3.15700100 | -2.87333100 |
| H | 2.92042100  | -2.07502900 | -1.48600900 |
| H | 2.10044700  | -3.63665000 | -1.32743900 |

**TS6RR**

|   |            |             |             |
|---|------------|-------------|-------------|
| C | 3.74252800 | 0.23118700  | 2.09693000  |
| C | 5.08327800 | -0.08759800 | 2.68849000  |
| C | 5.61306600 | -1.14344300 | 0.68696600  |
| C | 4.20290600 | -1.20871900 | 0.09960400  |
| C | 2.09892500 | 0.12176400  | 0.59512100  |
| H | 5.77156300 | 0.75477900  | 2.52734500  |
| H | 6.09868500 | -0.19916600 | 0.40279800  |
| H | 3.80163600 | -2.21463700 | 0.25336100  |
| N | 2.80346700 | 0.97228600  | 2.60148200  |
| N | 1.81064000 | 0.89472400  | 1.65328700  |
| N | 3.36317400 | -0.28846300 | 0.88251900  |
| H | 6.20432100 | -1.97545800 | 0.29863800  |
| H | 4.98559500 | -0.26077000 | 3.76101000  |
| O | 5.58690200 | -1.26513300 | 2.09793200  |
| C | 4.16418900 | -0.89064400 | -1.40447200 |
| H | 4.80263100 | -1.63436500 | -1.89530700 |
| H | 3.14321200 | -1.06144400 | -1.75650500 |
| C | 4.61875300 | 0.50414600  | -1.76586200 |
| C | 5.96761300 | 0.78440500  | -2.00723200 |
| C | 3.69013000 | 1.54530700  | -1.86050600 |
| C | 6.38659400 | 2.07778900  | -2.30778300 |
| H | 6.69655800 | -0.02233200 | -1.96927800 |
| C | 4.10797200 | 2.84044300  | -2.15855800 |
| H | 2.63173700 | 1.33228200  | -1.72465600 |
| C | 5.45640800 | 3.11221200  | -2.37670300 |
| H | 7.43736300 | 2.27550800  | -2.49451000 |
| H | 3.37342300 | 3.63733000  | -2.22985100 |
| H | 5.77980400 | 4.12105900  | -2.61213300 |

|   |             |             |             |
|---|-------------|-------------|-------------|
| C | 0.56301500  | 1.57102100  | 1.86456700  |
| C | -0.36625600 | 1.00549100  | 2.74213300  |
| C | 0.30865500  | 2.75001900  | 1.15384800  |
| C | -1.61697500 | 1.61786900  | 2.84498300  |
| C | -0.95394300 | 3.32166000  | 1.29002500  |
| C | -1.93663600 | 2.75611300  | 2.10664600  |
| H | -2.36691300 | 1.17046900  | 3.49246600  |
| H | -1.18236900 | 4.22929700  | 0.73632700  |
| C | -0.05557600 | -0.22940800 | 3.54909000  |
| H | -0.96640200 | -0.81098900 | 3.71461100  |
| H | 0.68194500  | -0.87086100 | 3.05825100  |
| H | 0.35936500  | 0.04419300  | 4.52408200  |
| C | -3.31680900 | 3.35823100  | 2.15599600  |
| H | -3.95093300 | 2.83836200  | 2.87809600  |
| H | -3.27797500 | 4.41631000  | 2.43082500  |
| H | -3.79456400 | 3.29662300  | 1.17014900  |
| C | 1.34573400  | 3.36964700  | 0.25751600  |
| H | 2.35606900  | 3.22831600  | 0.65023500  |
| H | 1.30006400  | 2.90276900  | -0.73024000 |
| H | 1.16080500  | 4.44077900  | 0.14955500  |
| C | 0.48386800  | -0.15684500 | -0.83567200 |
| O | 0.37665600  | 0.91881100  | -1.39090900 |
| C | -0.50257500 | -0.91417800 | 0.07644000  |
| C | -1.92741200 | -0.39924700 | -0.06865800 |
| H | -0.21574200 | -0.99074600 | 1.12161400  |
| H | -1.86528400 | 0.68047200  | 0.11727200  |
| C | -2.91404100 | -0.99039400 | 0.91887100  |
| C | -2.84292200 | -2.31958900 | 1.33973700  |
| C | -3.93921200 | -0.18158800 | 1.42190600  |
| C | -3.76714000 | -2.82320700 | 2.25370300  |
| H | -2.06549200 | -2.97335800 | 0.95855400  |
| C | -4.86412100 | -0.68236500 | 2.33121200  |
| H | -4.00245300 | 0.85614100  | 1.10107500  |
| C | -4.77738900 | -2.00759500 | 2.75356300  |
| H | -3.69509900 | -3.85816200 | 2.57198200  |
| H | -5.64928800 | -0.03687600 | 2.71243900  |
| H | -5.49461900 | -2.40151600 | 3.46631300  |
| C | -3.10074100 | -2.75230400 | -2.70017500 |
| C | -2.51303000 | -3.98425000 | -2.87648700 |
| C | -1.28140900 | -3.97415300 | -2.17975300 |
| C | -1.15668400 | -2.73270300 | -1.59730600 |
| N | -2.28316500 | -1.99118000 | -1.90770800 |
| H | -4.04068000 | -2.36775200 | -3.05446900 |
| H | -2.93441400 | -4.80421600 | -3.43841300 |



|   |             |             |             |
|---|-------------|-------------|-------------|
| H | -0.56562100 | -4.77890400 | -2.09933100 |
| C | -0.07858500 | -2.13838000 | -0.76753600 |
| O | 0.87619300  | -1.32652000 | -1.51277900 |
| C | 0.71905000  | -3.19870800 | -0.01951300 |
| F | 1.46704800  | -3.91821500 | -0.86355800 |
| F | -0.06720000 | -4.04432900 | 0.65669600  |
| F | 1.55656900  | -2.64437100 | 0.87590100  |
| C | -2.38285600 | -0.58171800 | -1.54834400 |
| H | -1.68786000 | -0.01920100 | -2.18122500 |
| C | -3.76718200 | 0.03387500  | -1.70393600 |
| O | -4.77166200 | -0.63837100 | -1.80209400 |
| C | -3.84778800 | 1.53381100  | -1.65479200 |
| C | -5.12913100 | 2.09215300  | -1.56601500 |
| C | -2.72757900 | 2.37428700  | -1.69113200 |
| C | -5.29439100 | 3.46998300  | -1.52220600 |
| H | -5.98177700 | 1.42216600  | -1.53446800 |
| C | -2.90081300 | 3.75636100  | -1.65801300 |
| H | -1.71659600 | 1.97617200  | -1.73850400 |
| C | -4.17768000 | 4.30541800  | -1.57393400 |
| H | -6.29015700 | 3.89489700  | -1.45232400 |
| H | -2.03040200 | 4.40318500  | -1.70083100 |
| H | -4.30426600 | 5.38307200  | -1.54712200 |

**TS6RS**

|   |             |             |             |
|---|-------------|-------------|-------------|
| C | -0.47989400 | -0.87595900 | -1.35712900 |
| O | -0.47075000 | -0.63304500 | -2.54103500 |
| C | 0.60217200  | -0.75730600 | -0.26387600 |
| C | 2.03657200  | -0.74878500 | -0.79249800 |
| H | 0.41464300  | 0.04704700  | 0.44924800  |
| H | 2.02744300  | -1.09581900 | -1.83214300 |
| C | 2.70372100  | 0.61067500  | -0.73689900 |
| C | 2.96064400  | 1.22562900  | 0.49252700  |
| C | 3.20225500  | 1.19435300  | -1.90223700 |
| C | 3.75354800  | 2.36523100  | 0.56070400  |
| H | 2.56442500  | 0.79500000  | 1.41014200  |
| C | 3.97544700  | 2.35222400  | -1.83884500 |
| H | 3.00165800  | 0.72230100  | -2.86028300 |
| C | 4.27154300  | 2.92634600  | -0.60526800 |
| H | 3.96820600  | 2.81602900  | 1.52482000  |
| H | 4.36365300  | 2.79122600  | -2.75250100 |
| H | 4.89832800  | 3.81142800  | -0.55187800 |
| C | 2.91084000  | -4.30436700 | -0.23922100 |
| C | 1.94599400  | -5.28369900 | -0.17075900 |
| C | 0.69594200  | -4.63936000 | 0.00556600  |

|   |             |             |             |
|---|-------------|-------------|-------------|
| C | 0.94182000  | -3.28525400 | 0.03248400  |
| N | 2.29415900  | -3.08826000 | -0.12494400 |
| H | 3.97703700  | -4.37386600 | -0.38713800 |
| H | 2.12262900  | -6.34570700 | -0.25282400 |
| H | -0.27731800 | -5.09990100 | 0.08899800  |
| C | 0.02640400  | -2.12084500 | 0.18592500  |
| O | -1.00542200 | -2.07637400 | -0.81921000 |
| C | -0.60170300 | -2.10119300 | 1.56907300  |
| F | -1.33501900 | -3.19648300 | 1.79167800  |
| F | 0.35514800  | -2.03210000 | 2.50562800  |
| F | -1.41125300 | -1.04375400 | 1.74667800  |
| C | 2.90317900  | -1.77629300 | -0.01589800 |
| H | 2.94496800  | -1.48338600 | 1.03828800  |
| C | 4.30041200  | -1.73119700 | -0.64994300 |
| O | 4.46648200  | -2.19209100 | -1.75950700 |
| C | 5.38177500  | -0.99717500 | 0.06778100  |
| C | 6.32300000  | -0.31481800 | -0.70886400 |
| C | 5.47517800  | -0.96657300 | 1.46229600  |
| C | 7.33497100  | 0.41241600  | -0.09530800 |
| H | 6.23076500  | -0.35132000 | -1.78945000 |
| C | 6.50555500  | -0.25940200 | 2.07296300  |
| H | 4.76380900  | -1.51072000 | 2.07603100  |
| C | 7.42709100  | 0.43901200  | 1.29574800  |
| H | 8.05292100  | 0.95779400  | -0.69867800 |
| H | 6.58668300  | -0.24961000 | 3.15465000  |
| H | 8.22045500  | 1.00343400  | 1.77512800  |
| C | -3.94645100 | 1.43579900  | -1.26582600 |
| C | -5.32850600 | 1.49807200  | -1.84812500 |
| C | -4.99009500 | -0.72747500 | -2.53471100 |
| C | -3.82619400 | -1.03313300 | -1.59032800 |
| C | -2.00993400 | 0.48323300  | -0.69738100 |
| H | -5.98323100 | 2.07912600  | -1.19611900 |
| H | -5.56407800 | -1.63754600 | -2.72144900 |
| H | -3.05630300 | -1.58546000 | -2.13764000 |
| N | -3.22431200 | 2.42208000  | -0.82646700 |
| N | -2.03862600 | 1.80346200  | -0.48429000 |
| N | -3.24744500 | 0.25882800  | -1.21617700 |
| H | -4.59928000 | -0.35402600 | -3.49321200 |
| H | -5.27594100 | 1.99431600  | -2.82865400 |
| O | -5.88730400 | 0.21008900  | -1.97003500 |
| C | -4.21265500 | -1.83469600 | -0.33204200 |
| H | -4.65460600 | -2.77920700 | -0.66724500 |
| H | -3.28031900 | -2.07864400 | 0.18562100  |
| C | -5.15409800 | -1.11657000 | 0.60541800  |

|   |             |             |             |
|---|-------------|-------------|-------------|
| C | -6.52829100 | -1.36414700 | 0.58500700  |
| C | -4.65947300 | -0.16636900 | 1.50398400  |
| C | -7.39032700 | -0.67020700 | 1.42806800  |
| H | -6.92630800 | -2.10058800 | -0.10863000 |
| C | -5.51890300 | 0.53604400  | 2.34520500  |
| H | -3.58843600 | 0.01387600  | 1.54653400  |
| C | -6.88848900 | 0.28718000  | 2.30774600  |
| H | -8.45578900 | -0.87517800 | 1.39768400  |
| H | -5.11569500 | 1.26977100  | 3.03702200  |
| H | -7.56049500 | 0.82933300  | 2.96523600  |
| C | -0.96237900 | 2.61241800  | 0.00973600  |
| C | -0.03050600 | 3.11189900  | -0.90476000 |
| C | -0.91716900 | 2.90758400  | 1.37431300  |
| C | 0.96595300  | 3.95197300  | -0.41262800 |
| C | 0.10479000  | 3.74453700  | 1.82079900  |
| C | 1.04372600  | 4.28346700  | 0.94021900  |
| H | 1.70720700  | 4.34698100  | -1.10257800 |
| H | 0.15918600  | 3.99054800  | 2.87879900  |
| C | -0.11401000 | 2.75675900  | -2.36461200 |
| H | -0.00282800 | 1.67812200  | -2.51773600 |
| H | -1.08631800 | 3.04546900  | -2.77712300 |
| H | 0.66943100  | 3.27023300  | -2.92533700 |
| C | 2.10671500  | 5.22856100  | 1.43759400  |
| H | 2.96456300  | 5.24373600  | 0.76094600  |
| H | 1.71573600  | 6.24898300  | 1.50569500  |
| H | 2.45617500  | 4.94398000  | 2.43376600  |
| C | -1.93653400 | 2.32921000  | 2.31987700  |
| H | -2.95082100 | 2.46154200  | 1.93074600  |
| H | -1.77280800 | 1.25478400  | 2.45340800  |
| H | -1.87153300 | 2.80873000  | 3.29820600  |

**TS6SR**

|   |             |             |            |
|---|-------------|-------------|------------|
| C | -3.80828000 | -0.61499800 | 1.76894000 |
| C | -5.07360300 | -0.29021200 | 2.50258700 |
| C | -5.44342600 | 1.39757500  | 0.95692400 |
| C | -4.06767800 | 1.38229100  | 0.28632200 |
| C | -2.17625800 | -0.31098300 | 0.28203200 |
| H | -5.89892900 | -0.91290100 | 2.12749500 |
| H | -6.11467600 | 0.68818000  | 0.45228600 |
| H | -3.47210300 | 2.22349200  | 0.65515400 |
| N | -2.97595500 | -1.57757800 | 2.01237200 |
| N | -1.97961900 | -1.37085600 | 1.08215800 |
| N | -3.37668700 | 0.15676700  | 0.71828900 |
| H | -5.86667700 | 2.40108000  | 0.87737100 |

|   |             |             |             |
|---|-------------|-------------|-------------|
| H | -4.94307200 | -0.48251600 | 3.56818700  |
| O | -5.36508400 | 1.07940900  | 2.33383000  |
| C | -4.17965700 | 1.49652100  | -1.24458900 |
| H | -4.74366800 | 2.41547500  | -1.44410600 |
| H | -3.17846600 | 1.64095900  | -1.65575000 |
| C | -4.83805100 | 0.31990400  | -1.92499400 |
| C | -6.22328100 | 0.24913400  | -2.10018900 |
| C | -4.04640200 | -0.72845300 | -2.40387100 |
| C | -6.80944800 | -0.85692200 | -2.71132900 |
| H | -6.84911400 | 1.07462200  | -1.76812900 |
| C | -4.63022800 | -1.83596600 | -3.01373600 |
| H | -2.96557000 | -0.64854000 | -2.31532900 |
| C | -6.01365700 | -1.90680900 | -3.16302200 |
| H | -7.88641400 | -0.89407700 | -2.84148400 |
| H | -4.00043300 | -2.64017600 | -3.38306600 |
| H | -6.46842200 | -2.76832300 | -3.64140900 |
| C | -0.87617300 | -2.28809700 | 1.07234500  |
| C | -0.59006500 | -3.01209400 | -0.09362200 |
| C | -0.15846000 | -2.47583600 | 2.26113300  |
| C | 0.41643800  | -3.97387400 | -0.02639600 |
| C | 0.83144700  | -3.45842100 | 2.27467700  |
| C | 1.11620100  | -4.23146000 | 1.15127800  |
| H | 0.65149800  | -4.54490100 | -0.92140500 |
| H | 1.39140900  | -3.62155800 | 3.19281500  |
| C | -1.34221700 | -2.78830800 | -1.37751200 |
| H | -2.42106200 | -2.74156200 | -1.20034500 |
| H | -1.04625900 | -1.84367400 | -1.84628700 |
| H | -1.13938500 | -3.60208400 | -2.07671900 |
| C | 2.14740900  | -5.32790100 | 1.20375900  |
| H | 1.66867500  | -6.30127000 | 1.35225900  |
| H | 2.71399900  | -5.37611600 | 0.27023100  |
| H | 2.84916500  | -5.17492700 | 2.02757400  |
| C | -0.43112000 | -1.65949000 | 3.49848700  |
| H | -0.60620000 | -0.60873400 | 3.25417300  |
| H | -1.32307300 | -2.01984600 | 4.01694100  |
| H | 0.41770400  | -1.72304600 | 4.18243000  |
| C | -0.79107900 | 0.83793500  | -0.97474000 |
| O | -0.95499500 | 0.48323600  | -2.11658000 |
| C | 0.45722600  | 0.80756300  | -0.06717600 |
| C | 1.76082900  | 0.73043000  | -0.85925600 |
| H | 0.42473600  | 0.08334900  | 0.74972900  |
| H | 1.56385800  | 1.06356500  | -1.88442500 |
| C | 2.36316100  | -0.65668800 | -0.91263400 |
| C | 2.81455400  | -1.28606900 | 0.25062500  |

|   |             |             |             |
|---|-------------|-------------|-------------|
| C | 2.60326000  | -1.26009600 | -2.14807400 |
| C | 3.54790600  | -2.46438200 | 0.17373100  |
| H | 2.62123100  | -0.83949000 | 1.22434400  |
| C | 3.31564900  | -2.45473400 | -2.22465500 |
| H | 2.24702500  | -0.77571900 | -3.05297500 |
| C | 3.80849000  | -3.04697900 | -1.06504800 |
| H | 3.91533300  | -2.92988500 | 1.08337900  |
| H | 3.50209800  | -2.90986500 | -3.19216700 |
| H | 4.39123900  | -3.96122600 | -1.12458600 |
| C | 2.83519300  | 4.25371400  | -0.68766700 |
| C | 1.91300100  | 5.27040100  | -0.58367200 |
| C | 0.68084500  | 4.68967100  | -0.19340100 |
| C | 0.89203300  | 3.33401000  | -0.07989700 |
| N | 2.20889400  | 3.07540100  | -0.38712400 |
| H | 3.87308200  | 4.27119100  | -0.98047000 |
| H | 2.10502400  | 6.31458700  | -0.77995400 |
| H | -0.25938400 | 5.19220900  | -0.02151300 |
| C | -0.01703500 | 2.22523700  | 0.32680300  |
| O | -1.20010600 | 2.11176000  | -0.48762700 |
| C | -0.41330300 | 2.37893300  | 1.78722500  |
| F | -1.03566800 | 3.54035600  | 2.00903400  |
| F | 0.67708600  | 2.32375100  | 2.56477400  |
| F | -1.24594900 | 1.40789200  | 2.20057200  |
| C | 2.78561000  | 1.74718000  | -0.29048300 |
| H | 2.98851300  | 1.50897500  | 0.75933300  |
| C | 4.05523900  | 1.60009500  | -1.14020100 |
| O | 4.06417600  | 2.01267100  | -2.28049800 |
| C | 5.19265400  | 0.81928100  | -0.57495500 |
| C | 5.93533600  | 0.03017000  | -1.45805000 |
| C | 5.52067400  | 0.84357600  | 0.78365000  |
| C | 6.98204100  | -0.74866800 | -0.98122100 |
| H | 5.66067300  | 0.02362300  | -2.50779100 |
| C | 6.58761000  | 0.08445500  | 1.25290200  |
| H | 4.96467600  | 1.46966900  | 1.47486600  |
| C | 7.30966500  | -0.71993400 | 0.37380000  |
| H | 7.54388200  | -1.37770100 | -1.66359700 |
| H | 6.85239800  | 0.11677500  | 2.30438700  |
| H | 8.13079800  | -1.32456900 | 0.74528000  |

**TS6SS**

|   |             |             |             |
|---|-------------|-------------|-------------|
| C | 0.07181000  | -0.09733900 | -1.25978800 |
| O | -0.10185900 | -1.07605500 | -1.95419700 |
| C | -0.72989000 | 0.52500500  | -0.10554400 |
| C | -2.20529700 | 0.15094600  | -0.17574900 |

|   |             |             |             |
|---|-------------|-------------|-------------|
| H | -0.31908500 | 0.35894700  | 0.88970900  |
| H | -2.22594500 | -0.94492200 | -0.19844400 |
| C | -3.04722300 | 0.60494000  | 0.99902200  |
| C | -4.02955800 | -0.25770600 | 1.49790100  |
| C | -2.90545400 | 1.86839900  | 1.57575900  |
| C | -4.86593300 | 0.13812800  | 2.53633500  |
| H | -4.14236200 | -1.24699800 | 1.05853800  |
| C | -3.73798000 | 2.26337600  | 2.62147100  |
| H | -2.14783000 | 2.55469600  | 1.21105200  |
| C | -4.72434500 | 1.40503800  | 3.09896900  |
| H | -5.62502000 | -0.54301800 | 2.90772300  |
| H | -3.61748300 | 3.24995000  | 3.05712100  |
| H | -5.37534100 | 1.71836100  | 3.90882500  |
| C | -3.43248100 | 3.03858600  | -2.16341700 |
| C | -2.76526400 | 4.24195200  | -2.16488300 |
| C | -1.47141600 | 4.01516500  | -1.63924900 |
| C | -1.38924800 | 2.67507000  | -1.33078400 |
| N | -2.60108400 | 2.08326800  | -1.64170400 |
| H | -4.43345800 | 2.79260900  | -2.46999200 |
| H | -3.17307800 | 5.18340000  | -2.50099600 |
| H | -0.68762400 | 4.74256400  | -1.49108900 |
| C | -0.28860200 | 1.85863600  | -0.75940300 |
| O | 0.49533700  | 1.13105500  | -1.75783000 |
| C | 0.67780400  | 2.70218600  | 0.05883400  |
| F | 1.31790800  | 3.58491300  | -0.71713000 |
| F | 0.04748500  | 3.37925600  | 1.02609700  |
| F | 1.61515400  | 1.94613000  | 0.64935200  |
| C | -2.78546500 | 0.64193300  | -1.53888800 |
| H | -2.20677200 | 0.16758700  | -2.33972300 |
| C | -4.22741600 | 0.16156200  | -1.65504100 |
| O | -5.17418300 | 0.90557300  | -1.51238400 |
| C | -4.42979400 | -1.30858000 | -1.87916300 |
| C | -5.73791200 | -1.79028800 | -1.75306100 |
| C | -3.39133200 | -2.19817800 | -2.18553400 |
| C | -6.00915400 | -3.14042700 | -1.92954100 |
| H | -6.52567700 | -1.08454200 | -1.51236400 |
| C | -3.66917700 | -3.55103500 | -2.36133100 |
| H | -2.36253300 | -1.86105300 | -2.28501300 |
| C | -4.97319400 | -4.02305600 | -2.23424700 |
| H | -7.02527200 | -3.50694800 | -1.82886100 |
| H | -2.86184500 | -4.23556700 | -2.59914900 |
| H | -5.18285800 | -5.07897600 | -2.37188400 |
| C | 3.62191200  | -2.22647200 | -0.10712100 |
| C | 4.85872800  | -2.87839700 | -0.64937300 |

|   |             |             |             |
|---|-------------|-------------|-------------|
| C | 4.47358700  | -1.70502800 | -2.64842900 |
| C | 3.45181700  | -0.70753800 | -2.09365700 |
| C | 1.87739800  | -0.83345700 | -0.14403600 |
| H | 5.60613200  | -2.98168300 | 0.13870500  |
| H | 5.03188100  | -1.24633800 | -3.46743200 |
| H | 2.59088000  | -0.66100400 | -2.76925900 |
| N | 2.99395100  | -2.47872700 | 1.00343100  |
| N | 1.92644800  | -1.60761900 | 0.94828800  |
| N | 2.96994900  | -1.26019900 | -0.82816900 |
| H | 3.95054300  | -2.59335500 | -3.03343400 |
| H | 4.60415000  | -3.87926300 | -1.02925400 |
| O | 5.42277300  | -2.08563900 | -1.66987900 |
| C | 3.98627500  | 0.72123500  | -1.88018800 |
| H | 4.30538400  | 1.10410500  | -2.85545500 |
| H | 3.13789600  | 1.33130600  | -1.55091200 |
| C | 5.11422200  | 0.81125600  | -0.88138200 |
| C | 6.44823400  | 0.82541200  | -1.29302000 |
| C | 4.83507500  | 0.85012400  | 0.48791000  |
| C | 7.48040600  | 0.86141400  | -0.36047600 |
| H | 6.67932900  | 0.79931500  | -2.35516500 |
| C | 5.86435600  | 0.87954900  | 1.42500500  |
| H | 3.79889200  | 0.86711400  | 0.81505000  |
| C | 7.19142500  | 0.88278300  | 1.00249600  |
| H | 8.51206600  | 0.87177000  | -0.69762300 |
| H | 5.62784300  | 0.91042300  | 2.48459800  |
| H | 7.99625300  | 0.91045900  | 1.73000200  |
| C | 0.93231300  | -1.56488700 | 1.97989500  |
| C | -0.24860800 | -2.29156700 | 1.79267700  |
| C | 1.12844400  | -0.71287400 | 3.06950400  |
| C | -1.27782600 | -2.09800600 | 2.71315300  |
| C | 0.07260300  | -0.55896900 | 3.96758800  |
| C | -1.14279800 | -1.22171800 | 3.79144000  |
| H | -2.21266800 | -2.63718400 | 2.57952500  |
| H | 0.19848000  | 0.10832000  | 4.81714000  |
| C | -0.40401600 | -3.22860600 | 0.62344900  |
| H | -0.35210400 | -2.68985700 | -0.32886700 |
| H | 0.39607700  | -3.97531100 | 0.61962500  |
| H | -1.36325700 | -3.74841800 | 0.67666800  |
| C | -2.28809400 | -0.97271900 | 4.73628800  |
| H | -2.72672000 | 0.01198400  | 4.54464700  |
| H | -3.07775800 | -1.71622300 | 4.60810100  |
| H | -1.95328200 | -0.99579800 | 5.77686200  |
| C | 2.41566900  | 0.05022000  | 3.24232500  |
| H | 2.56846900  | 0.30610300  | 4.29270600  |

|   |            |             |            |
|---|------------|-------------|------------|
| H | 3.27348500 | -0.53104500 | 2.89440300 |
| H | 2.38626300 | 0.98287200  | 2.67015400 |

**M7RR**

|   |             |             |             |
|---|-------------|-------------|-------------|
| C | 1.00674700  | -2.23775000 | -1.06223700 |
| O | 0.34453900  | -3.10945700 | -1.53343800 |
| C | 1.07229300  | -0.72043600 | -1.16025600 |
| C | -0.23626000 | -0.05513700 | -0.73204700 |
| H | 1.42830000  | -0.34333000 | -2.12085500 |
| H | -1.02320100 | -0.51666900 | -1.33844800 |
| C | -0.28623900 | 1.44177100  | -0.96060700 |
| C | 0.80281900  | 2.27406000  | -0.69085400 |
| C | -1.47343000 | 2.00974100  | -1.43156000 |
| C | 0.70237900  | 3.64833600  | -0.89165900 |
| H | 1.73694000  | 1.85755500  | -0.32672200 |
| C | -1.57434600 | 3.38301200  | -1.62907200 |
| H | -2.32605900 | 1.36845800  | -1.64449800 |
| C | -0.48425000 | 4.20615600  | -1.35897700 |
| H | 1.55635300  | 4.28338600  | -0.68017700 |
| H | -2.50232800 | 3.80788400  | -1.99733300 |
| H | -0.55856700 | 5.27745800  | -1.51427500 |
| C | 0.56799100  | 0.60327800  | 2.82708500  |
| C | 1.87169900  | 0.73301300  | 3.24947900  |
| C | 2.70691400  | 0.19703400  | 2.24168400  |
| C | 1.88181100  | -0.24241400 | 1.23004000  |
| N | 0.57189100  | 0.02014500  | 1.58822700  |
| H | -0.35264500 | 0.89694300  | 3.29902400  |
| H | 2.18513200  | 1.17511100  | 4.18305200  |
| H | 3.78500600  | 0.14227900  | 2.24303000  |
| C | 2.16169000  | -0.88174300 | -0.06981700 |
| O | 1.95074600  | -2.34240500 | -0.08652500 |
| C | 3.57350900  | -0.63432400 | -0.57717600 |
| F | 4.49000600  | -1.12065700 | 0.26201800  |
| F | 3.80141900  | 0.67445000  | -0.73414100 |
| F | 3.75182000  | -1.22540900 | -1.76471500 |
| C | -0.53082300 | -0.43265700 | 0.75404300  |
| H | -0.58474900 | -1.52626300 | 0.83171300  |
| C | -1.89848000 | 0.13128100  | 1.13175600  |
| O | -2.01258200 | 1.13045500  | 1.80789600  |
| C | -3.10007600 | -0.55896700 | 0.56166700  |
| C | -4.33170000 | 0.08660300  | 0.72454700  |
| C | -3.04821200 | -1.78464100 | -0.11475600 |
| C | -5.49408300 | -0.48258800 | 0.22293100  |
| H | -4.35069400 | 1.03613300  | 1.24835400  |



|   |             |             |             |
|---|-------------|-------------|-------------|
| C | -4.21595600 | -2.35259300 | -0.61481700 |
| H | -2.11146100 | -2.31304500 | -0.26549700 |
| C | -5.43695800 | -1.70453000 | -0.44677600 |
| H | -6.44462500 | 0.02388700  | 0.35188300  |
| H | -4.16899500 | -3.30277200 | -1.13536400 |
| H | -6.34470500 | -2.15125900 | -0.83912700 |

**M7RS**

|   |             |             |             |
|---|-------------|-------------|-------------|
| C | -2.31007300 | 2.01555100  | -0.89902400 |
| O | -2.24060000 | 3.04073400  | -1.49472100 |
| C | -1.42064200 | 1.18774000  | 0.02264300  |
| C | -0.15315400 | 0.63675200  | -0.63861100 |
| H | -1.21638600 | 1.66016400  | 0.98583000  |
| H | -0.30952600 | 0.56488700  | -1.72132800 |
| C | 1.07748800  | 1.47942200  | -0.38142600 |
| C | 1.51831000  | 1.72907700  | 0.92130200  |
| C | 1.84954800  | 1.92061000  | -1.45618300 |
| C | 2.71779300  | 2.39636600  | 1.14390800  |
| H | 0.93640600  | 1.38100900  | 1.77223900  |
| C | 3.04694900  | 2.59671700  | -1.23500500 |
| H | 1.51578900  | 1.72068600  | -2.47056200 |
| C | 3.48569900  | 2.83033600  | 0.06485500  |
| H | 3.05577000  | 2.57359000  | 2.15954900  |
| H | 3.63768200  | 2.93586300  | -2.07958900 |
| H | 4.42233000  | 3.34967900  | 0.23864200  |
| C | -1.13066800 | -2.90552800 | -1.00445700 |
| C | -2.44733100 | -3.26665900 | -1.18385300 |
| C | -3.24679000 | -2.14961100 | -0.84016400 |
| C | -2.38762700 | -1.13876300 | -0.47139900 |
| N | -1.09512700 | -1.60731800 | -0.57849800 |
| H | -0.22034300 | -3.45942500 | -1.17162400 |
| H | -2.79258000 | -4.22742500 | -1.53466500 |
| H | -4.32399900 | -2.07730900 | -0.86495300 |
| C | -2.63528600 | 0.23545300  | 0.02138600  |
| O | -3.34135000 | 1.11349600  | -0.90481400 |
| C | -3.38692200 | 0.24942800  | 1.34339500  |
| F | -4.57147700 | -0.35427100 | 1.25096600  |
| F | -2.65978700 | -0.37913000 | 2.27703800  |
| F | -3.59572300 | 1.50365200  | 1.76489900  |
| C | 0.05907500  | -0.82642200 | -0.16875600 |
| H | 0.14749600  | -0.84275200 | 0.92284000  |
| C | 1.35455200  | -1.30917400 | -0.83754600 |
| O | 1.35353300  | -1.54365900 | -2.02752600 |
| C | 2.60346400  | -1.33321200 | -0.02605000 |

|   |            |             |             |
|---|------------|-------------|-------------|
| C | 3.80490600 | -1.06101700 | -0.68859000 |
| C | 2.61021800 | -1.60181500 | 1.34611700  |
| C | 4.99905300 | -1.03549500 | 0.01934200  |
| H | 3.77643300 | -0.85338000 | -1.75319900 |
| C | 3.81152300 | -1.59942200 | 2.04734700  |
| H | 1.68960500 | -1.83935800 | 1.86975100  |
| C | 5.00260000 | -1.30597400 | 1.38749600  |
| H | 5.92756100 | -0.80542400 | -0.49217700 |
| H | 3.81734200 | -1.82313900 | 3.10868300  |
| H | 5.93642500 | -1.28942400 | 1.94005400  |

**M7SR**

|   |             |             |             |
|---|-------------|-------------|-------------|
| C | 2.30991100  | 2.01571300  | -0.89881200 |
| O | 2.24049000  | 3.04097300  | -1.49439000 |
| C | 1.42042000  | 1.18771900  | 0.02264900  |
| C | 0.15308300  | 0.63652000  | -0.63874800 |
| H | 1.21592100  | 1.66007400  | 0.98581700  |
| H | 0.30960500  | 0.56456500  | -1.72143800 |
| C | -1.07762700 | 1.47915500  | -0.38180600 |
| C | -1.51873800 | 1.72877600  | 0.92083100  |
| C | -1.84939400 | 1.92046800  | -1.45672000 |
| C | -2.71819700 | 2.39618500  | 1.14319100  |
| H | -0.93709100 | 1.38056000  | 1.77188300  |
| C | -3.04676700 | 2.59670900  | -1.23578800 |
| H | -1.51542400 | 1.72055300  | -2.47103100 |
| C | -3.48578900 | 2.83032200  | 0.06398000  |
| H | -3.05640500 | 2.57336600  | 2.15876300  |
| H | -3.63726500 | 2.93596100  | -2.08049300 |
| H | -4.42238400 | 3.34979500  | 0.23757400  |
| C | 1.13114900  | -2.90543200 | -1.00498300 |
| C | 2.44787100  | -3.26618200 | -1.18470500 |
| C | 3.24713000  | -2.14906900 | -0.84073600 |
| C | 2.38777600  | -1.13857700 | -0.47146700 |
| N | 1.09537700  | -1.60738000 | -0.57853700 |
| H | 0.22093300  | -3.45948600 | -1.17219400 |
| H | 2.79328000  | -4.22676700 | -1.53585400 |
| H | 4.32431900  | -2.07650100 | -0.86560100 |
| C | 2.63519200  | 0.23560900  | 0.02156400  |
| O | 3.34131500  | 1.11379600  | -0.90441700 |
| C | 3.38652900  | 0.24952200  | 1.34374600  |
| F | 4.57113700  | -0.35409500 | 1.25156800  |
| F | 2.65922500  | -0.37917100 | 2.27718200  |
| F | 3.59517500  | 1.50371100  | 1.76542900  |
| C | -0.05892600 | -0.82665200 | -0.16877200 |

|   |             |             |             |
|---|-------------|-------------|-------------|
| H | -0.14723800 | -0.84293400 | 0.92283200  |
| C | -1.35441300 | -1.30962500 | -0.83734900 |
| O | -1.35350300 | -1.54448900 | -2.02725600 |
| C | -2.60326700 | -1.33343500 | -0.02574000 |
| C | -3.80477600 | -1.06161700 | -0.68830400 |
| C | -2.60989500 | -1.60142100 | 1.34655100  |
| C | -4.99887000 | -1.03585500 | 0.01971600  |
| H | -3.77640800 | -0.85444600 | -1.75300600 |
| C | -3.81113700 | -1.59875300 | 2.04788400  |
| H | -1.68922900 | -1.83867600 | 1.87022100  |
| C | -5.00228800 | -1.30569200 | 1.38799500  |
| H | -5.92743000 | -0.80607800 | -0.49183800 |
| H | -3.81685600 | -1.82197700 | 3.10932300  |
| H | -5.93606800 | -1.28894000 | 1.94062300  |

### M7SS

|   |             |             |             |
|---|-------------|-------------|-------------|
| C | -1.00650500 | -2.23735900 | -1.06290400 |
| O | -0.34403100 | -3.10877500 | -1.53424200 |
| C | -1.07234100 | -0.72005400 | -1.16052600 |
| C | 0.23620000  | -0.05463700 | -0.73236100 |
| H | -1.42849300 | -0.34279300 | -2.12100800 |
| H | 1.02305000  | -0.51587500 | -1.33911900 |
| C | 0.28581600  | 1.44235300  | -0.96043700 |
| C | 1.47303600  | 2.01091100  | -1.43062500 |
| C | -0.80368000 | 2.27414100  | -0.69100800 |
| C | 1.57351400  | 3.38426800  | -1.62770100 |
| H | 2.32601700  | 1.37001400  | -1.64331800 |
| C | -0.70368400 | 3.64852800  | -0.89137400 |
| H | -1.73781100 | 1.85718000  | -0.32742600 |
| C | 0.48296200  | 4.20692800  | -1.35792500 |
| H | 2.50151800  | 3.80961400  | -1.99536200 |
| H | -1.55801600 | 4.28317500  | -0.68013600 |
| H | 0.55696600  | 5.27830000  | -1.51289300 |
| C | -0.56748500 | 0.60200500  | 2.82732100  |
| C | -1.87109800 | 0.73092400  | 3.25025500  |
| C | -2.70643700 | 0.19545700  | 2.24228200  |
| C | -1.88149700 | -0.24283700 | 1.23000100  |
| N | -0.57156400 | 0.01985400  | 1.58800200  |
| H | 0.35319700  | 0.89568800  | 3.29916800  |
| H | -2.18440200 | 1.17221800  | 4.18425100  |
| H | -3.78450900 | 0.14033700  | 2.24390600  |
| C | -2.16158300 | -0.88180800 | -0.07002900 |
| O | -1.95042500 | -2.34239800 | -0.08712500 |
| C | -3.57359600 | -0.63451300 | -0.57692400 |

|   |             |             |             |
|---|-------------|-------------|-------------|
| F | -4.48969600 | -1.12180400 | 0.26213400  |
| F | -3.80209100 | 0.67427700  | -0.73295200 |
| F | -3.75194400 | -1.22480500 | -1.76483800 |
| C | 0.53107300  | -0.43261500 | 0.75351900  |
| H | 0.58516900  | -1.52624200 | 0.83086000  |
| C | 1.89871700  | 0.13136800  | 1.13122300  |
| O | 2.01275700  | 1.13044800  | 1.80751700  |
| C | 3.10034700  | -0.55884900 | 0.56118000  |
| C | 4.33206000  | 0.08636900  | 0.72478200  |
| C | 3.04842300  | -1.78415600 | -0.11590900 |
| C | 5.49448100  | -0.48282400 | 0.22325600  |
| H | 4.35109200  | 1.03562300  | 1.24908400  |
| C | 4.21620500  | -2.35209600 | -0.61590200 |
| H | 2.11160600  | -2.31227200 | -0.26726000 |
| C | 5.43729900  | -1.70440400 | -0.44710700 |
| H | 6.44509700  | 0.02336600  | 0.35278200  |
| H | 4.16920100  | -3.30198100 | -1.13697900 |
| H | 6.34507500  | -2.15113400 | -0.83938800 |

#### TS7RR

|   |             |             |             |
|---|-------------|-------------|-------------|
| C | -0.59929100 | -0.42214500 | -0.80754600 |
| O | -1.02770500 | 0.64754900  | -1.25349400 |
| C | 0.82185300  | -0.94094900 | -1.02546900 |
| C | 1.88684600  | 0.09888000  | -0.68204200 |
| H | 0.95775100  | -1.31372100 | -2.04526600 |
| H | 1.59576000  | 1.00796900  | -1.21766000 |
| C | 3.30246400  | -0.26343700 | -1.09263200 |
| C | 3.77925300  | -1.57669600 | -1.09159000 |
| C | 4.16626300  | 0.76585100  | -1.48160500 |
| C | 5.09389000  | -1.85053100 | -1.46189600 |
| H | 3.13269500  | -2.40477200 | -0.81799800 |
| C | 5.47994600  | 0.49352300  | -1.84671700 |
| H | 3.80261300  | 1.79065200  | -1.50491700 |
| C | 5.94833500  | -0.81789200 | -1.83488600 |
| H | 5.44713500  | -2.87627500 | -1.46047900 |
| H | 6.13425200  | 1.30475700  | -2.14768800 |
| H | 6.97150700  | -1.03439800 | -2.12294800 |
| C | 2.47622700  | -1.00421200 | 2.80803400  |
| C | 2.24475500  | -2.33727400 | 3.21534800  |
| C | 1.51481100  | -2.95146900 | 2.22441700  |
| C | 1.31811600  | -1.99588500 | 1.19125100  |
| N | 1.93933900  | -0.80542100 | 1.60436200  |
| H | 3.00379100  | -0.21836400 | 3.32426200  |
| H | 2.59603200  | -2.76905700 | 4.13963800  |

|   |             |             |             |
|---|-------------|-------------|-------------|
| H | 1.16649600  | -3.97359900 | 2.19360800  |
| C | 0.69362800  | -2.07156800 | -0.03024200 |
| O | -1.19714900 | -1.24743100 | -0.03995300 |
| C | 0.22372800  | -3.42528500 | -0.52042000 |
| F | -0.53978400 | -4.03943400 | 0.38082500  |
| F | 1.29857600  | -4.19867400 | -0.74529200 |
| F | -0.45147600 | -3.33082100 | -1.66168800 |
| C | 1.77064100  | 0.42969900  | 0.83468400  |
| H | 0.75474500  | 0.79100000  | 1.03607400  |
| C | 2.76402400  | 1.52636700  | 1.22041100  |
| O | 3.77330200  | 1.26265500  | 1.83854900  |
| C | 2.45879500  | 2.91239800  | 0.76160400  |
| C | 3.45541400  | 3.87559800  | 0.96237600  |
| C | 1.25060000  | 3.27832400  | 0.15273500  |
| C | 3.24903500  | 5.18843500  | 0.56292400  |
| H | 4.38394500  | 3.56997200  | 1.43222600  |
| C | 1.04958400  | 4.59624400  | -0.24463300 |
| H | 0.45947000  | 2.55536400  | -0.02832200 |
| C | 2.04447100  | 5.54943200  | -0.04027600 |
| H | 4.02394800  | 5.93079700  | 0.71957800  |
| H | 0.11470600  | 4.87853600  | -0.71600700 |
| H | 1.88199500  | 6.57531200  | -0.35392500 |
| C | -4.51492600 | 1.58362100  | -1.16084300 |
| C | -5.85752000 | 1.55863300  | -0.90178900 |
| C | -6.40129400 | 0.53055200  | -0.07757000 |
| C | -5.48395800 | -0.43096900 | 0.43486500  |
| C | -4.15313200 | -0.33912100 | 0.12913300  |
| N | -3.68298600 | 0.65378000  | -0.65228300 |
| H | -4.05982000 | 2.34419100  | -1.78318200 |
| H | -6.48216500 | 2.32686300  | -1.33412800 |
| H | -5.81373100 | -1.24509800 | 1.06398100  |
| H | -3.40488800 | -1.04202700 | 0.47768400  |
| N | -7.71227100 | 0.47263100  | 0.20013700  |
| C | -8.23443500 | -0.59155800 | 1.05084700  |
| H | -7.79157600 | -0.54665900 | 2.05056400  |
| H | -9.31099300 | -0.47074500 | 1.14604200  |
| H | -8.03511300 | -1.57517700 | 0.61498600  |
| C | -8.62118500 | 1.47740400  | -0.34103200 |
| H | -8.60987800 | 1.46715500  | -1.43507700 |
| H | -9.63157500 | 1.25516400  | -0.00635500 |
| H | -8.35342100 | 2.47835000  | 0.01111000  |
| H | -2.65730600 | 0.68926100  | -0.87139100 |

TS7RS

S101/S123

|   |             |             |             |
|---|-------------|-------------|-------------|
| C | 0.93552200  | 0.25709300  | 0.87653900  |
| O | 1.33459200  | -0.84605400 | 1.25870600  |
| C | -0.48357300 | 0.78197300  | 1.11293700  |
| C | -1.41954200 | -0.00920200 | 0.17547200  |
| H | -0.80486800 | 0.74737400  | 2.15730300  |
| H | -0.84134600 | -0.28299500 | -0.71650800 |
| C | -1.95868800 | -1.27234800 | 0.81325300  |
| C | -2.59163300 | -1.24089400 | 2.05811600  |
| C | -1.92147300 | -2.47032200 | 0.09923300  |
| C | -3.18374900 | -2.38853900 | 2.57609800  |
| H | -2.64354600 | -0.31605100 | 2.62867700  |
| C | -2.51762200 | -3.61796300 | 0.61381200  |
| H | -1.43522300 | -2.49774200 | -0.87251000 |
| C | -3.15222100 | -3.57815300 | 1.85210300  |
| H | -3.67387700 | -2.35230700 | 3.54333700  |
| H | -2.48691000 | -4.54184500 | 0.04605100  |
| H | -3.61844400 | -4.47143800 | 2.25392500  |
| C | -2.54213900 | 2.83452900  | -1.91012500 |
| C | -1.79859900 | 4.03217000  | -2.02491300 |
| C | -0.81009000 | 3.99026900  | -1.07077400 |
| C | -0.93333000 | 2.74909600  | -0.38261500 |
| N | -2.02119900 | 2.07209500  | -0.95502700 |
| H | -3.41393100 | 2.52043400  | -2.46659300 |
| H | -1.99420600 | 4.81557600  | -2.74062100 |
| H | -0.04439800 | 4.72676300  | -0.87594900 |
| C | -0.21153300 | 2.18529300  | 0.63693800  |
| O | 1.55459100  | 1.12070300  | 0.17279700  |
| C | 0.60056400  | 3.11448800  | 1.52417800  |
| F | 1.49260400  | 3.81622800  | 0.82780400  |
| F | -0.23670500 | 3.98546200  | 2.10676800  |
| F | 1.22942400  | 2.45704000  | 2.49596100  |
| C | -2.58358100 | 0.85349700  | -0.36468100 |
| H | -3.24762500 | 1.15090000  | 0.45082900  |
| C | -3.31450800 | 0.04033000  | -1.45440000 |
| O | -2.80898900 | 0.00920100  | -2.55838600 |
| C | -4.54787700 | -0.71998500 | -1.12784500 |
| C | -5.02808800 | -1.59155200 | -2.11526000 |
| C | -5.22623000 | -0.61580500 | 0.09155800  |
| C | -6.16508100 | -2.35062000 | -1.88457900 |
| H | -4.48867500 | -1.66000000 | -3.05356000 |
| C | -6.36607300 | -1.37972500 | 0.31948300  |
| H | -4.87858000 | 0.04647500  | 0.87595200  |
| C | -6.83441400 | -2.24593500 | -0.66461200 |
| H | -6.53088400 | -3.02593000 | -2.65026700 |

|   |             |             |             |
|---|-------------|-------------|-------------|
| H | -6.88735500 | -1.29865600 | 1.26689700  |
| H | -7.72269400 | -2.84157100 | -0.48173100 |
| C | 4.38532700  | -0.05682400 | -0.27153600 |
| C | 5.67059500  | -0.10118100 | -0.74244100 |
| C | 6.46151900  | -1.26736900 | -0.54228000 |
| C | 5.84556800  | -2.34828100 | 0.15149500  |
| C | 4.55594600  | -2.22562400 | 0.59274300  |
| N | 3.84450300  | -1.10184700 | 0.38425700  |
| H | 3.72756600  | 0.79729600  | -0.39105700 |
| H | 6.06020600  | 0.76148800  | -1.26363800 |
| H | 6.37443800  | -3.27069500 | 0.34382000  |
| H | 4.04956100  | -3.02014700 | 1.12722300  |
| N | 7.72689300  | -1.34609300 | -0.98502500 |
| C | 8.50220300  | -2.56315500 | -0.77554100 |
| H | 8.02212700  | -3.42176800 | -1.25524500 |
| H | 9.48843100  | -2.43240700 | -1.21489600 |
| H | 8.62424900  | -2.77269700 | 0.29178100  |
| C | 8.32873300  | -0.21583100 | -1.68244900 |
| H | 8.32935900  | 0.67756500  | -1.05075300 |
| H | 9.35915100  | -0.46183500 | -1.92837000 |
| H | 7.79328600  | 0.00486100  | -2.61131700 |
| H | 2.84775400  | -1.02567200 | 0.73862700  |

**TS7SR**

|   |             |             |             |
|---|-------------|-------------|-------------|
| C | -0.93577300 | 0.25557600  | 0.87596900  |
| O | -1.33411800 | -0.84821600 | 1.25704000  |
| C | 0.48318700  | 0.78089500  | 1.11283300  |
| C | 1.41985200  | -0.00972500 | 0.17557100  |
| H | 0.80403200  | 0.74602800  | 2.15732500  |
| H | 0.84185300  | -0.28450300 | -0.71622900 |
| C | 1.96041100  | -1.27203400 | 0.81385000  |
| C | 2.59320100  | -1.23938700 | 2.05876300  |
| C | 1.92502200  | -2.47023900 | 0.10012600  |
| C | 3.18690900  | -2.38604100 | 2.57711400  |
| H | 2.64369800  | -0.31433800 | 2.62910000  |
| C | 2.52276900  | -3.61689300 | 0.61505800  |
| H | 1.43896200  | -2.49860700 | -0.87168300 |
| C | 3.15717300  | -3.57588000 | 1.85341200  |
| H | 3.67690200  | -2.34884400 | 3.54438400  |
| H | 2.49348200  | -4.54094000 | 0.04749300  |
| H | 3.62468900  | -4.46838200 | 2.25547300  |
| C | 2.53947100  | 2.83449300  | -1.91100200 |
| C | 1.79526000  | 4.03176200  | -2.02546100 |
| C | 0.80753200  | 3.98959800  | -1.07054600 |

|   |             |             |             |
|---|-------------|-------------|-------------|
| C | 0.93189000  | 2.74859400  | -0.38224600 |
| N | 2.01966600  | 2.07202200  | -0.95533100 |
| H | 3.41094300  | 2.52069800  | -2.46812900 |
| H | 1.98992600  | 4.81509000  | -2.74151500 |
| H | 0.04162100  | 4.72575100  | -0.87530400 |
| C | 0.21076900  | 2.18432700  | 0.63747700  |
| O | -1.55538400 | 1.11949300  | 0.17313900  |
| C | -0.60142000 | 3.11291000  | 1.52526300  |
| F | -1.49385700 | 3.81463600  | 0.82937400  |
| F | 0.23570100  | 3.98392300  | 2.10801000  |
| F | -1.22986200 | 2.45486500  | 2.49691200  |
| C | 2.58306000  | 0.85383700  | -0.36508300 |
| H | 3.24718000  | 1.15179700  | 0.45016400  |
| C | 3.31416000  | 0.04110200  | -1.45501600 |
| O | 2.80813200  | 0.00940500  | -2.55875800 |
| C | 4.54816700  | -0.71834400 | -1.12887900 |
| C | 5.02855400  | -1.58970400 | -2.11639400 |
| C | 5.22668700  | -0.61390300 | 0.09041000  |
| C | 6.16585100  | -2.34837100 | -1.88589600 |
| H | 4.48901800  | -1.65834600 | -3.05460900 |
| C | 6.36682100  | -1.37744100 | 0.31814900  |
| H | 4.87899500  | 0.04833400  | 0.87482200  |
| C | 6.83529700  | -2.24350500 | -0.66600700 |
| H | 6.53178100  | -3.02354600 | -2.65164300 |
| H | 6.88820200  | -1.29621600 | 1.26549700  |
| H | 7.72377800  | -2.83887500 | -0.48323900 |
| C | -4.38564200 | -0.05785300 | -0.27013000 |
| C | -5.67096200 | -0.10138700 | -0.74094500 |
| C | -6.46200900 | -1.26776400 | -0.54239300 |
| C | -5.84625700 | -2.34956900 | 0.15016300  |
| C | -4.55656800 | -2.22770200 | 0.59146400  |
| N | -3.84494800 | -1.10376800 | 0.38435800  |
| H | -3.72778300 | 0.79635100  | -0.38851400 |
| H | -6.06062900 | 0.76229200  | -1.26043200 |
| H | -6.37527600 | -3.27215900 | 0.34125100  |
| H | -4.05029100 | -3.02300900 | 1.12487700  |
| N | -7.72727900 | -1.34575700 | -0.98554700 |
| C | -8.50392500 | -2.56184500 | -0.77524200 |
| H | -8.62416100 | -2.77172500 | 0.29221000  |
| H | -9.49090800 | -2.42951600 | -1.21251100 |
| H | -8.02600300 | -3.42096100 | -1.25622700 |
| C | -8.32816000 | -0.21480100 | -1.68265800 |
| H | -7.78918900 | 0.00878300  | -2.60875500 |
| H | -9.35701400 | -0.46201300 | -1.93363800 |



|   |             |             |             |
|---|-------------|-------------|-------------|
| H | -8.33282700 | 0.67718600  | -1.04894700 |
| H | -2.84790600 | -1.02830100 | 0.73803700  |

**TS7SS**

|   |             |             |             |
|---|-------------|-------------|-------------|
| C | 0.58903100  | -0.42708600 | -0.80472500 |
| O | 1.02528500  | 0.63483800  | -1.26118600 |
| C | -0.83207800 | -0.94347700 | -1.02411900 |
| C | -1.89591800 | 0.10180900  | -0.69267000 |
| H | -0.96565000 | -1.32515500 | -2.04099900 |
| H | -1.60310600 | 1.00640400  | -1.23529900 |
| C | -3.31094200 | -0.26547200 | -1.10174600 |
| C | -4.19352200 | 0.76335300  | -1.44777300 |
| C | -3.76770600 | -1.58489400 | -1.14507200 |
| C | -5.50553900 | 0.48384300  | -1.81274600 |
| H | -3.84645800 | 1.79411600  | -1.43831200 |
| C | -5.08107900 | -1.86607900 | -1.51482100 |
| H | -3.10685800 | -2.41254700 | -0.90664400 |
| C | -5.95400600 | -0.83431300 | -1.84422300 |
| H | -6.17446700 | 1.29504300  | -2.07970300 |
| H | -5.41834500 | -2.89664300 | -1.54741200 |
| H | -6.97604700 | -1.05608500 | -2.13227700 |
| C | -2.52034200 | -0.97566700 | 2.79592400  |
| C | -2.29977300 | -2.30783600 | 3.21206300  |
| C | -1.56021500 | -2.92991200 | 2.23307400  |
| C | -1.34717400 | -1.98018200 | 1.19802000  |
| N | -1.96761400 | -0.78527700 | 1.59805400  |
| H | -3.05034100 | -0.18453000 | 3.30140300  |
| H | -2.66482900 | -2.73405500 | 4.13358400  |
| H | -1.21685000 | -3.95396300 | 2.21091300  |
| C | -0.71106400 | -2.06534800 | -0.01717100 |
| O | 1.17828600  | -1.24550900 | -0.02270300 |
| C | -0.23712400 | -3.42487800 | -0.48771100 |
| F | 0.53308300  | -4.02041900 | 0.42016000  |
| F | -1.30900400 | -4.20776800 | -0.69429500 |
| F | 0.43254700  | -3.34574000 | -1.63347100 |
| C | -1.78027100 | 0.44299400  | 0.82226500  |
| H | -0.75935100 | 0.78971700  | 1.02359400  |
| C | -2.75515400 | 1.55759000  | 1.20159200  |
| O | -3.77352300 | 1.31222400  | 1.81260000  |
| C | -2.42002000 | 2.93838400  | 0.74766200  |
| C | -3.39358600 | 3.92340300  | 0.95611100  |
| C | -1.20517400 | 3.27965400  | 0.13761800  |
| C | -3.15751200 | 5.23338200  | 0.56393700  |
| H | -4.32767200 | 3.63703200  | 1.42710800  |

|   |             |             |             |
|---|-------------|-------------|-------------|
| C | -0.97456200 | 4.59481400  | -0.25269800 |
| H | -0.43113500 | 2.53988200  | -0.04940800 |
| C | -1.94627200 | 5.56981700  | -0.04012100 |
| H | -3.91445800 | 5.99267200  | 0.72715700  |
| H | -0.03441200 | 4.85778500  | -0.72477300 |
| H | -1.76063700 | 6.59354700  | -0.34787600 |
| C | 4.51489500  | 1.56069300  | -1.16557700 |
| C | 5.85751000  | 1.53004700  | -0.90734800 |
| C | 6.39708000  | 0.50118200  | -0.08134000 |
| C | 5.47563100  | -0.45490600 | 0.43395400  |
| C | 4.14495400  | -0.35718900 | 0.12944000  |
| N | 3.67897000  | 0.63606000  | -0.65405500 |
| H | 4.06294900  | 2.32182700  | -1.78954200 |
| H | 6.48543800  | 2.29431800  | -1.34193700 |
| H | 5.80208900  | -1.26909500 | 1.06472200  |
| H | 3.39357500  | -1.05524900 | 0.48105200  |
| N | 7.70797600  | 0.43772700  | 0.19540200  |
| C | 8.22606400  | -0.62763100 | 1.04716900  |
| H | 8.02233100  | -1.61091000 | 0.61255800  |
| H | 9.30315900  | -0.51119700 | 1.14162100  |
| H | 7.78399300  | -0.57964900 | 2.04708800  |
| C | 8.62078700  | 1.43816800  | -0.34728000 |
| H | 8.35706900  | 2.44054100  | 0.00385900  |
| H | 9.63039100  | 1.21229900  | -0.01265300 |
| H | 8.60912000  | 1.42675000  | -1.44130500 |
| H | 2.65365200  | 0.67492800  | -0.87368100 |

**PRR**

|   |             |             |             |
|---|-------------|-------------|-------------|
| C | 1.35812300  | 0.12509900  | -1.42874300 |
| C | -0.04406300 | 0.09751600  | -0.87997900 |
| H | 1.50970500  | 0.51804300  | -2.42776200 |
| H | -0.72820000 | -0.17561200 | -1.68947700 |
| C | -0.47201700 | 1.46781400  | -0.36969900 |
| C | 0.31494100  | 2.18000800  | 0.53998700  |
| C | -1.69359300 | 2.00614900  | -0.77953400 |
| C | -0.11999100 | 3.40614500  | 1.03242600  |
| H | 1.27009600  | 1.77518000  | 0.86210900  |
| C | -2.12659800 | 3.23598700  | -0.28935500 |
| H | -2.31295000 | 1.45468700  | -1.48318700 |
| C | -1.34042700 | 3.93750000  | 0.61947600  |
| H | 0.49734500  | 3.94899700  | 1.74072200  |
| H | -3.07665100 | 3.64369900  | -0.61940900 |
| H | -1.67501100 | 4.89543900  | 1.00418400  |
| C | 1.00050300  | -1.48611500 | 2.40221800  |

|   |             |             |             |
|---|-------------|-------------|-------------|
| C | 2.32259000  | -1.52418700 | 2.78190200  |
| C | 3.09639700  | -1.06102900 | 1.68891700  |
| C | 2.21521700  | -0.75429600 | 0.67261100  |
| N | 0.93261600  | -0.99216700 | 1.12445000  |
| H | 0.10708500  | -1.74444900 | 2.94481700  |
| H | 2.68823200  | -1.83629800 | 3.74864800  |
| H | 4.16924700  | -0.94543600 | 1.64352500  |
| C | 2.39673100  | -0.25737200 | -0.67797000 |
| C | 3.80335000  | -0.17316500 | -1.18839900 |
| F | 4.40463800  | -1.37301700 | -1.17725100 |
| F | 4.55177700  | 0.63910400  | -0.42247800 |
| F | 3.86263100  | 0.29331200  | -2.44180300 |
| C | -0.19477800 | -1.01323700 | 0.20692800  |
| H | -0.19721300 | -1.98329900 | -0.30666100 |
| C | -1.53629400 | -0.81309700 | 0.91428300  |
| O | -1.59698300 | -0.38517500 | 2.04625000  |
| C | -2.78005100 | -1.07489400 | 0.12246900  |
| C | -3.96242900 | -0.49073600 | 0.59044900  |
| C | -2.80589500 | -1.84355000 | -1.04587700 |
| C | -5.15217400 | -0.66561800 | -0.10327200 |
| H | -3.91891600 | 0.10647600  | 1.49494600  |
| C | -4.00151200 | -2.02359800 | -1.73571500 |
| H | -1.90595200 | -2.31902800 | -1.42274500 |
| C | -5.17252100 | -1.43290200 | -1.26793900 |
| H | -6.06410400 | -0.20365200 | 0.25975300  |
| H | -4.01765400 | -2.62680300 | -2.63705100 |
| H | -6.10197700 | -1.57052200 | -1.81087600 |

**PRS**

|   |             |            |             |
|---|-------------|------------|-------------|
| C | -1.68173500 | 1.18805300 | -0.44736400 |
| C | -0.34120500 | 0.59228500 | -0.79437400 |
| H | -1.81054100 | 2.26189200 | -0.53179000 |
| H | -0.37131300 | 0.26587800 | -1.84480600 |
| C | 0.81216600  | 1.55415100 | -0.60434900 |
| C | 0.87490200  | 2.36479400 | 0.53170400  |
| C | 1.87520900  | 1.56937700 | -1.50876200 |
| C | 1.98903200  | 3.16556700 | 0.76747200  |
| H | 0.04972700  | 2.35907200 | 1.24056800  |
| C | 2.99147500  | 2.36692900 | -1.27376200 |
| H | 1.83446400  | 0.93573600 | -2.39161600 |
| C | 3.05222200  | 3.16331700 | -0.13278800 |
| H | 2.02735200  | 3.78976500 | 1.65446400  |
| H | 3.81475300  | 2.36352900 | -1.98053500 |
| H | 3.92293300  | 3.78391100 | 0.05196800  |

|   |             |             |             |
|---|-------------|-------------|-------------|
| C | -1.32193500 | -2.91119500 | 0.13038500  |
| C | -2.64502700 | -3.27182200 | 0.25956600  |
| C | -3.41886000 | -2.08730500 | 0.19121500  |
| C | -2.53764100 | -1.03780400 | 0.01939200  |
| N | -1.26153100 | -1.55458600 | -0.03532600 |
| H | -0.42731500 | -3.51375600 | 0.11326100  |
| H | -3.01324300 | -4.28076700 | 0.36964200  |
| H | -4.49432200 | -2.00072500 | 0.23745400  |
| C | -2.70246300 | 0.39857100  | -0.09312200 |
| C | -4.05806800 | 0.95897600  | 0.21298700  |
| F | -4.99974900 | 0.42313600  | -0.58204200 |
| F | -4.42586000 | 0.69389600  | 1.47625100  |
| F | -4.10745100 | 2.28720400  | 0.05209900  |
| C | -0.08920000 | -0.69556700 | 0.04182500  |
| H | 0.06385400  | -0.40764800 | 1.08765200  |
| C | 1.14185400  | -1.41040100 | -0.53253100 |
| O | 1.00285100  | -2.07311400 | -1.54122600 |
| C | 2.48450000  | -1.23480000 | 0.09781500  |
| C | 3.56811300  | -1.84569500 | -0.54610500 |
| C | 2.70972900  | -0.47504900 | 1.25052700  |
| C | 4.85484100  | -1.69855100 | -0.04848900 |
| H | 3.37502500  | -2.42685700 | -1.44118500 |
| C | 4.00196500  | -0.32289400 | 1.74321800  |
| H | 1.89466000  | 0.02175400  | 1.76316000  |
| C | 5.07350100  | -0.93301000 | 1.09695700  |
| H | 5.68905900  | -2.17458800 | -0.55284500 |
| H | 4.17014200  | 0.27575800  | 2.63200000  |
| H | 6.07996800  | -0.81161900 | 1.48443300  |

**PSR**

|   |             |            |             |
|---|-------------|------------|-------------|
| C | 1.68165100  | 1.18809000 | -0.44715200 |
| C | 0.34116200  | 0.59218200 | -0.79407400 |
| H | 1.81029500  | 2.26195500 | -0.53150800 |
| H | 0.37132600  | 0.26566200 | -1.84448500 |
| C | -0.81231200 | 1.55392900 | -0.60417000 |
| C | -0.87513800 | 2.36472100 | 0.53179400  |
| C | -1.87532000 | 1.56895600 | -1.50859600 |
| C | -1.98934700 | 3.16539700 | 0.76744300  |
| H | -0.04995000 | 2.35917700 | 1.24064500  |
| C | -2.99169500 | 2.36641300 | -1.27370800 |
| H | -1.83444700 | 0.93523300 | -2.39137800 |
| C | -3.05254300 | 3.16291200 | -0.13283300 |
| H | -2.02773900 | 3.78971900 | 1.65434500  |
| H | -3.81494900 | 2.36284600 | -1.98050700 |

|   |             |             |             |
|---|-------------|-------------|-------------|
| H | -3.92333700 | 3.78340800  | 0.05185400  |
| C | 1.32222000  | -2.91114900 | 0.13096700  |
| C | 2.64538800  | -3.27168600 | 0.25971000  |
| C | 3.41911000  | -2.08713300 | 0.19099500  |
| C | 2.53773700  | -1.03769200 | 0.01948800  |
| N | 1.26165400  | -1.55455000 | -0.03472300 |
| H | 0.42763500  | -3.51377200 | 0.11432600  |
| H | 3.01366800  | -4.28061000 | 0.36976600  |
| H | 4.49457700  | -2.00044100 | 0.23688000  |
| C | 2.70249800  | 0.39868200  | -0.09306100 |
| C | 4.05813400  | 0.95916300  | 0.21276300  |
| F | 4.99961000  | 0.42357000  | -0.58270200 |
| F | 4.42636500  | 0.69396000  | 1.47586200  |
| F | 4.10730300  | 2.28740600  | 0.05200100  |
| C | 0.08920500  | -0.69564900 | 0.04217900  |
| H | -0.06411200 | -0.40772500 | 1.08796700  |
| C | -1.14174300 | -1.41060400 | -0.53231000 |
| O | -1.00265000 | -2.07339800 | -1.54092300 |
| C | -2.48447400 | -1.23489900 | 0.09785800  |
| C | -3.56805100 | -1.84563300 | -0.54626500 |
| C | -2.70980900 | -0.47510800 | 1.25052300  |
| C | -4.85486200 | -1.69826300 | -0.04891300 |
| H | -3.37489200 | -2.42683700 | -1.44130200 |
| C | -4.00211700 | -0.32270300 | 1.74292900  |
| H | -1.89474900 | 0.02152300  | 1.76334400  |
| C | -5.07363200 | -0.93264400 | 1.09645200  |
| H | -5.68904800 | -2.17418900 | -0.55342900 |
| H | -4.17036800 | 0.27600200  | 2.63166200  |
| H | -6.08016200 | -0.81103900 | 1.48369900  |

**PSS**

|   |             |             |             |
|---|-------------|-------------|-------------|
| C | -1.35812200 | 0.12509200  | -1.42874400 |
| C | 0.04406300  | 0.09751800  | -0.87997800 |
| H | -1.50970500 | 0.51802600  | -2.42776600 |
| H | 0.72820100  | -0.17561500 | -1.68947400 |
| C | 0.47201500  | 1.46782100  | -0.36970700 |
| C | 1.69359600  | 2.00614800  | -0.77953500 |
| C | -0.31495100 | 2.18002600  | 0.53996300  |
| C | 2.12660000  | 3.23598900  | -0.28936300 |
| H | 2.31295900  | 1.45467900  | -1.48317800 |
| C | 0.11998000  | 3.40616700  | 1.03239500  |
| H | -1.27011100 | 1.77520500  | 0.86207900  |
| C | 1.34042200  | 3.93751400  | 0.61945400  |
| H | 3.07665900  | 3.64369400  | -0.61941000 |

|   |             |             |             |
|---|-------------|-------------|-------------|
| H | -0.49736200 | 3.94902800  | 1.74067900  |
| H | 1.67500600  | 4.89545500  | 1.00415700  |
| C | -1.00050100 | -1.48609100 | 2.40223100  |
| C | -2.32258900 | -1.52416900 | 2.78191100  |
| C | -3.09639600 | -1.06102100 | 1.68892200  |
| C | -2.21521600 | -0.75428900 | 0.67261700  |
| N | -0.93261400 | -0.99215100 | 1.12446000  |
| H | -0.10708300 | -1.74441500 | 2.94483300  |
| H | -2.68823200 | -1.83627600 | 3.74865800  |
| H | -4.16924700 | -0.94543400 | 1.64352700  |
| C | -2.39673000 | -0.25737800 | -0.67796900 |
| C | -3.80334900 | -0.17318200 | -1.18839800 |
| F | -4.40463300 | -1.37303700 | -1.17723600 |
| F | -4.55177600 | 0.63909400  | -0.42248600 |
| F | -3.86263000 | 0.29328100  | -2.44180700 |
| C | 0.19477800  | -1.01322900 | 0.20693700  |
| H | 0.19721000  | -1.98329300 | -0.30664800 |
| C | 1.53629600  | -0.81309100 | 0.91428800  |
| O | 1.59698900  | -0.38516400 | 2.04625400  |
| C | 2.78005200  | -1.07489600 | 0.12247400  |
| C | 3.96243300  | -0.49074400 | 0.59045300  |
| C | 2.80589100  | -1.84355300 | -1.04587100 |
| C | 5.15217600  | -0.66563300 | -0.10326800 |
| H | 3.91892300  | 0.10646900  | 1.49494900  |
| C | 4.00150600  | -2.02360800 | -1.73571000 |
| H | 1.90594500  | -2.31902700 | -1.42273800 |
| C | 5.17251900  | -1.43291700 | -1.26793500 |
| H | 6.06411000  | -0.20367100 | 0.25975600  |
| H | 4.01764500  | -2.62681400 | -2.63704500 |
| H | 6.10197400  | -1.57054300 | -1.81087300 |

**TS6RR-Decar**

|   |            |             |             |
|---|------------|-------------|-------------|
| C | 3.53478400 | 0.09073000  | 1.83258900  |
| C | 4.82782800 | -0.37905300 | 2.42458100  |
| C | 5.23969900 | -1.59390700 | 0.50026700  |
| C | 3.91390300 | -1.30878600 | -0.22828000 |
| C | 1.87406800 | 0.08510600  | 0.41818400  |
| H | 5.63785900 | 0.32578400  | 2.18889900  |
| H | 5.97687100 | -0.82084800 | 0.24680000  |
| H | 3.32643700 | -2.22010800 | -0.34319100 |
| N | 2.64985600 | 0.88767200  | 2.35575900  |
| N | 1.62930800 | 0.89290600  | 1.45289900  |
| N | 3.10946400 | -0.40879000 | 0.62935900  |
| H | 5.61519300 | -2.56160600 | 0.16403900  |

|   |             |             |             |
|---|-------------|-------------|-------------|
| H | 4.72461900  | -0.45767000 | 3.50721100  |
| O | 5.10045400  | -1.65978300 | 1.90535200  |
| C | 4.16961800  | -0.69744300 | -1.62112900 |
| H | 4.85000200  | -1.38618300 | -2.13559100 |
| H | 3.22336700  | -0.71518500 | -2.16761100 |
| C | 4.75337500  | 0.69591800  | -1.59759100 |
| C | 6.13514400  | 0.91031700  | -1.62521800 |
| C | 3.90685200  | 1.80934700  | -1.54611100 |
| C | 6.66124100  | 2.19889300  | -1.57232900 |
| H | 6.80746500  | 0.05957200  | -1.70704000 |
| C | 4.43038800  | 3.09881500  | -1.49238200 |
| H | 2.82881000  | 1.66562400  | -1.58023000 |
| C | 5.80913600  | 3.29737500  | -1.49789800 |
| H | 7.73649100  | 2.34344000  | -1.59869000 |
| H | 3.75720000  | 3.95043900  | -1.46045200 |
| H | 6.21652900  | 4.30233400  | -1.46021100 |
| C | 0.40699300  | 1.59647400  | 1.73498200  |
| C | -0.44745100 | 1.06714800  | 2.70759800  |
| C | 0.12562100  | 2.77367200  | 1.03267600  |
| C | -1.68422100 | 1.68993500  | 2.87728900  |
| C | -1.11492400 | 3.36505000  | 1.25788500  |
| C | -2.04602100 | 2.81680100  | 2.14095800  |
| H | -2.38951800 | 1.26441200  | 3.58672700  |
| H | -1.36714100 | 4.27433300  | 0.71840300  |
| C | -0.08070200 | -0.11290000 | 3.57108200  |
| H | -0.96066200 | -0.73794200 | 3.74355000  |
| H | 0.70113400  | -0.73533100 | 3.13218800  |
| H | 0.28515200  | 0.23543300  | 4.54192200  |
| C | -3.40896700 | 3.44225100  | 2.28201100  |
| H | -3.34173200 | 4.43698700  | 2.73308400  |
| H | -3.87585400 | 3.55863100  | 1.29731600  |
| H | -4.06366600 | 2.82788500  | 2.90435700  |
| C | 1.11043300  | 3.40823400  | 0.08804000  |
| H | 2.14125600  | 3.16846400  | 0.36310600  |
| H | 0.94582200  | 3.04994800  | -0.93157100 |
| H | 0.99541200  | 4.49447500  | 0.10746700  |
| C | 0.98413300  | -0.19693300 | -0.79434700 |
| O | 0.57180800  | 0.79888800  | -1.38688000 |
| C | -0.62701400 | -1.15078700 | 0.37462400  |
| C | -1.92883500 | -0.47606400 | 0.03196000  |
| H | -0.39806100 | -1.22188900 | 1.42905300  |
| H | -1.81947600 | 0.60610000  | 0.20082300  |
| C | -3.11565500 | -0.94761100 | 0.86243700  |
| C | -3.26658300 | -2.29030800 | 1.21721700  |

|   |             |             |             |
|---|-------------|-------------|-------------|
| C | -4.09096500 | -0.03291100 | 1.27278500  |
| C | -4.36955900 | -2.70744700 | 1.95840700  |
| H | -2.50415500 | -3.00617800 | 0.92223600  |
| C | -5.19135100 | -0.44533800 | 2.01885100  |
| H | -3.98001400 | 1.01509300  | 1.00126100  |
| C | -5.33410800 | -1.78754600 | 2.36314500  |
| H | -4.47372300 | -3.75502100 | 2.22351100  |
| H | -5.93573800 | 0.28121600  | 2.33119200  |
| H | -6.18995200 | -2.11419000 | 2.94538100  |
| C | -2.78369400 | -2.74768000 | -2.81170700 |
| C | -2.15356300 | -3.96623600 | -2.97331600 |
| C | -1.01974300 | -3.97371300 | -2.13313000 |
| C | -0.99868200 | -2.75835900 | -1.47156500 |
| N | -2.09163900 | -2.02431300 | -1.88522800 |
| H | -3.67474000 | -2.35401900 | -3.26887500 |
| H | -2.48863500 | -4.76268700 | -3.62080700 |
| H | -0.30589400 | -4.77277000 | -2.00038900 |
| C | -0.13544400 | -2.20938700 | -0.43665200 |
| O | 1.18833500  | -1.39576800 | -1.35520200 |
| C | 0.72067800  | -3.23793700 | 0.26578200  |
| F | 1.51563800  | -3.92992100 | -0.56126800 |
| F | -0.04583900 | -4.12634400 | 0.91411700  |
| F | 1.52386500  | -2.66950000 | 1.18950300  |
| C | -2.20175400 | -0.62212100 | -1.49948000 |
| H | -1.40468500 | -0.08104900 | -2.01793700 |
| C | -3.53723400 | 0.01786600  | -1.83250900 |
| O | -4.53560700 | -0.63436700 | -2.05967900 |
| C | -3.59889000 | 1.51874800  | -1.80060400 |
| C | -4.87295000 | 2.09945800  | -1.79466900 |
| C | -2.46422600 | 2.33765300  | -1.78342200 |
| C | -5.01603600 | 3.48013700  | -1.77460600 |
| H | -5.73689800 | 1.44324200  | -1.80364300 |
| C | -2.61392700 | 3.72316400  | -1.78355400 |
| H | -1.46257700 | 1.91458200  | -1.76773000 |
| C | -3.88297400 | 4.29569900  | -1.77551500 |
| H | -6.00631400 | 3.92349100  | -1.76524000 |
| H | -1.73108200 | 4.35527200  | -1.79077800 |
| H | -3.99147700 | 5.37579600  | -1.77198200 |

**TS6RS-Decar**

|   |             |             |             |
|---|-------------|-------------|-------------|
| C | 0.97503800  | -0.84201500 | 0.95288400  |
| O | 0.42633200  | -1.10181100 | 2.00720500  |
| C | -0.73245000 | -0.27982400 | -0.49946800 |
| C | -2.01247900 | -0.45703700 | 0.27156100  |



|   |             |             |             |
|---|-------------|-------------|-------------|
| H | -0.58494200 | 0.65440100  | -1.02883700 |
| H | -1.79808700 | -0.76670200 | 1.31006700  |
| C | -2.87054900 | 0.79248000  | 0.29874100  |
| C | -3.20438700 | 1.44689400  | -0.89218900 |
| C | -3.43635900 | 1.24744900  | 1.49045500  |
| C | -4.09766200 | 2.51297200  | -0.89356200 |
| H | -2.76003200 | 1.10492100  | -1.82442600 |
| C | -4.32108400 | 2.32530300  | 1.49710900  |
| H | -3.19353900 | 0.73690600  | 2.41978000  |
| C | -4.65953100 | 2.95743200  | 0.30333000  |
| H | -4.35771900 | 2.99971200  | -1.82899000 |
| H | -4.75609800 | 2.66037900  | 2.43360500  |
| H | -5.35894300 | 3.78771100  | 0.30368000  |
| C | -2.51295200 | -4.07475300 | -0.62341000 |
| C | -1.47551100 | -4.85810500 | -1.08411600 |
| C | -0.37349900 | -4.00315700 | -1.30756800 |
| C | -0.77370300 | -2.72136600 | -0.97919500 |
| N | -2.07997700 | -2.78384800 | -0.54731500 |
| H | -3.51526300 | -4.34076800 | -0.32514100 |
| H | -1.50933400 | -5.92836700 | -1.22431800 |
| H | 0.61656700  | -4.27722900 | -1.63882800 |
| C | -0.06768900 | -1.43373000 | -1.01591600 |
| O | 1.30172200  | -1.71198500 | -0.01406900 |
| C | 0.70732200  | -1.19561000 | -2.29626500 |
| F | 1.56902700  | -2.17701900 | -2.59664900 |
| F | -0.12961400 | -1.07021400 | -3.33457300 |
| F | 1.42786700  | -0.05718400 | -2.23042900 |
| C | -2.90267000 | -1.60964800 | -0.30566600 |
| H | -3.32109600 | -1.27793000 | -1.26068700 |
| C | -3.99654200 | -1.92209600 | 0.71543800  |
| O | -3.72415100 | -2.60870200 | 1.68121200  |
| C | -5.35709900 | -1.30894200 | 0.58080400  |
| C | -6.20863700 | -1.41476600 | 1.68780000  |
| C | -5.80298800 | -0.64063000 | -0.56314300 |
| C | -7.47791900 | -0.85523800 | 1.65672600  |
| H | -5.84620100 | -1.93814400 | 2.56591700  |
| C | -7.07672800 | -0.07966300 | -0.59277900 |
| H | -5.16765400 | -0.54202000 | -1.43519900 |
| C | -7.91353200 | -0.18338000 | 0.51434800  |
| H | -8.12867700 | -0.93825100 | 2.52101900  |
| H | -7.41270500 | 0.44117300  | -1.48328800 |
| H | -8.90472800 | 0.25819300  | 0.48843700  |
| C | 3.91998900  | 1.20204200  | 1.59722900  |
| C | 5.26796000  | 1.29174300  | 2.25730200  |

|   |             |             |             |
|---|-------------|-------------|-------------|
| C | 4.69083000  | -0.75978100 | 3.28522900  |
| C | 3.68904200  | -1.19828000 | 2.21715200  |
| C | 2.00316800  | 0.31123600  | 1.03030300  |
| H | 6.00362300  | 1.65412800  | 1.53585100  |
| H | 5.17823100  | -1.63746200 | 3.71220500  |
| H | 2.84172100  | -1.69778900 | 2.69416900  |
| N | 3.25955000  | 2.15983000  | 1.01686200  |
| N | 2.06755100  | 1.58702000  | 0.66453200  |
| N | 3.17686300  | 0.05747200  | 1.64218500  |
| H | 4.17184200  | -0.21585400 | 4.08801500  |
| H | 5.19623700  | 2.01004600  | 3.08574500  |
| O | 5.71204900  | 0.03583400  | 2.71593500  |
| C | 4.28177600  | -2.10702500 | 1.11331400  |
| H | 4.91587100  | -2.84641200 | 1.61333600  |
| H | 3.44354300  | -2.63570800 | 0.65285400  |
| C | 5.05206700  | -1.38025500 | 0.03248300  |
| C | 6.42815800  | -1.15437700 | 0.12110600  |
| C | 4.36345300  | -0.91907800 | -1.09394500 |
| C | 7.09820200  | -0.46477800 | -0.88621400 |
| H | 6.97319400  | -1.50937000 | 0.99048300  |
| C | 5.03320600  | -0.23003800 | -2.10309500 |
| H | 3.29967800  | -1.12145100 | -1.17867100 |
| C | 6.40177700  | 0.00413200  | -1.99920300 |
| H | 8.16781800  | -0.29865700 | -0.80477500 |
| H | 4.47992300  | 0.11102400  | -2.97332000 |
| H | 6.92676500  | 0.53802800  | -2.78482300 |
| C | 1.07096400  | 2.42216200  | 0.04971800  |
| C | -0.06421900 | 2.74917900  | 0.79288800  |
| C | 1.32591400  | 2.91312300  | -1.23209500 |
| C | -1.00337100 | 3.57698700  | 0.18318800  |
| C | 0.34952100  | 3.73154200  | -1.79707200 |
| C | -0.81773700 | 4.06740000  | -1.10934500 |
| H | -1.91572100 | 3.81949600  | 0.72340300  |
| H | 0.50986300  | 4.11895800  | -2.80063100 |
| C | -0.27368700 | 2.21744300  | 2.18421200  |
| H | -0.46716100 | 1.13911000  | 2.16966500  |
| H | 0.60947100  | 2.38866400  | 2.80933900  |
| H | -1.12866500 | 2.71022600  | 2.64968200  |
| C | -1.85693500 | 4.94144300  | -1.76122900 |
| H | -2.27303900 | 4.44982600  | -2.64637800 |
| H | -2.68011500 | 5.15223800  | -1.07561300 |
| H | -1.42213000 | 5.89077900  | -2.08729700 |
| C | 2.60649100  | 2.61530600  | -1.96506900 |
| H | 3.36030300  | 3.37456900  | -1.73465600 |

|   |            |            |             |
|---|------------|------------|-------------|
| H | 3.02223500 | 1.64630600 | -1.68591200 |
| H | 2.43416700 | 2.61889500 | -3.04335700 |

**TS6SR-Decar**

|   |             |             |             |
|---|-------------|-------------|-------------|
| C | -3.67628700 | -0.93084400 | 1.51981400  |
| C | -4.89930300 | -0.77567500 | 2.37072300  |
| C | -5.29960500 | 1.26055000  | 1.35873100  |
| C | -4.01729600 | 1.34824700  | 0.51396100  |
| C | -2.07191400 | -0.29214300 | 0.18876700  |
| H | -5.76943600 | -1.23412500 | 1.87972300  |
| H | -6.08647700 | 0.74551700  | 0.79210700  |
| H | -3.37560800 | 2.15382000  | 0.87004500  |
| N | -2.84807400 | -1.93232300 | 1.48590200  |
| N | -1.86347900 | -1.53048300 | 0.63437400  |
| N | -3.25436700 | 0.09286800  | 0.71575200  |
| H | -5.63235900 | 2.27595200  | 1.57995600  |
| H | -4.73403300 | -1.26183600 | 3.33268100  |
| O | -5.10536200 | 0.59919600  | 2.59213900  |
| C | -4.35678600 | 1.59338000  | -0.97051100 |
| H | -4.99390400 | 2.48532300  | -0.98987900 |
| H | -3.43130200 | 1.85643800  | -1.48813900 |
| C | -5.05044400 | 0.44303500  | -1.66222300 |
| C | -6.44543900 | 0.35129100  | -1.70745300 |
| C | -4.29652200 | -0.55921000 | -2.28204100 |
| C | -7.07207200 | -0.72667600 | -2.32778000 |
| H | -7.04879600 | 1.14234300  | -1.26832800 |
| C | -4.92012300 | -1.63854800 | -2.90316900 |
| H | -3.21223200 | -0.47736800 | -2.30696100 |
| C | -6.30981100 | -1.72930200 | -2.92138700 |
| H | -8.15577500 | -0.77699600 | -2.35520800 |
| H | -4.31694500 | -2.40174200 | -3.38571900 |
| H | -6.79591600 | -2.56792100 | -3.40889900 |
| C | -0.74725300 | -2.41523500 | 0.42576200  |
| C | -0.65711200 | -3.12259600 | -0.77818100 |
| C | 0.10319400  | -2.64018100 | 1.51115600  |
| C | 0.37689400  | -4.04845700 | -0.89106400 |
| C | 1.11235100  | -3.58751200 | 1.34622800  |
| C | 1.26511900  | -4.29586400 | 0.15707100  |
| H | 0.47277600  | -4.61169100 | -1.81621500 |
| H | 1.79939600  | -3.76755600 | 2.16874000  |
| C | -1.65693000 | -2.94643100 | -1.88820800 |
| H | -2.67157100 | -2.84267800 | -1.49075400 |
| H | -1.43080000 | -2.04879500 | -2.46913000 |
| H | -1.63779200 | -3.81360700 | -2.55106000 |

|   |             |             |             |
|---|-------------|-------------|-------------|
| C | 2.33529800  | -5.34596300 | 0.01408300  |
| H | 2.81003100  | -5.28992100 | -0.96905600 |
| H | 3.10854900  | -5.22396800 | 0.77530200  |
| H | 1.90715200  | -6.34835600 | 0.11777100  |
| C | -0.07985600 | -1.95368400 | 2.83928500  |
| H | -0.68330100 | -2.57742900 | 3.50633600  |
| H | 0.89359000  | -1.79286900 | 3.30919500  |
| H | -0.58306000 | -0.98922200 | 2.74720500  |
| C | -1.22601500 | 0.55482100  | -0.75276800 |
| O | -0.83842700 | 0.05179800  | -1.78671800 |
| C | 0.62816200  | 0.83113100  | 0.67278200  |
| C | 1.82560300  | 0.54076100  | -0.18308000 |
| H | 0.55607900  | 0.35031200  | 1.63879100  |
| H | 1.51924800  | 0.35118500  | -1.22667900 |
| C | 2.65338800  | -0.63082700 | 0.30070100  |
| C | 3.02853100  | -0.73124000 | 1.64459300  |
| C | 3.18388600  | -1.54494900 | -0.61069300 |
| C | 3.92441600  | -1.71049600 | 2.06422600  |
| H | 2.63151600  | -0.01500500 | 2.36054600  |
| C | 4.09343100  | -2.51599100 | -0.19871500 |
| H | 2.90398900  | -1.46976700 | -1.65877300 |
| C | 4.46828100  | -2.60111500 | 1.13959800  |
| H | 4.21121500  | -1.76860400 | 3.11032800  |
| H | 4.51468100  | -3.20381100 | -0.92586900 |
| H | 5.18213000  | -3.35407500 | 1.46007600  |
| C | 2.48328600  | 4.10695400  | -1.17137000 |
| C | 1.48484200  | 5.05719900  | -1.13783400 |
| C | 0.36684000  | 4.46601900  | -0.50765900 |
| C | 0.71891900  | 3.17211300  | -0.17311800 |
| N | 2.01215100  | 2.96274500  | -0.59757300 |
| H | 3.48137700  | 4.15062100  | -1.57919100 |
| H | 1.55390000  | 6.05749000  | -1.53893200 |
| H | -0.60160200 | 4.91027800  | -0.33504400 |
| C | -0.01802400 | 2.09662800  | 0.51259100  |
| O | -1.35504500 | 1.86828500  | -0.51330500 |
| C | -0.75318300 | 2.57431300  | 1.74830200  |
| F | -1.62155000 | 3.57054500  | 1.50604900  |
| F | 0.10263700  | 3.01363900  | 2.67638700  |
| F | -1.47086800 | 1.57793200  | 2.31506700  |
| C | 2.78872000  | 1.77691400  | -0.27008300 |
| H | 3.24657600  | 1.92062200  | 0.71316500  |
| C | 3.83467600  | 1.50376600  | -1.34936600 |
| O | 3.53172400  | 1.64806600  | -2.51822800 |
| C | 5.18272200  | 0.96442200  | -0.97668600 |

|   |            |             |             |
|---|------------|-------------|-------------|
| C | 5.97893100 | 0.48132300  | -2.02266300 |
| C | 5.66218100 | 0.89684500  | 0.33448200  |
| C | 7.22506900 | -0.07065500 | -1.76296200 |
| H | 5.59017900 | 0.54222200  | -3.03337900 |
| C | 6.91266600 | 0.34237700  | 0.59369800  |
| H | 5.06931100 | 1.26086100  | 1.16510400  |
| C | 7.69300300 | -0.14419500 | -0.45076500 |
| H | 7.83229500 | -0.44759900 | -2.57947900 |
| H | 7.27404200 | 0.28832400  | 1.61531600  |
| H | 8.66557900 | -0.57962100 | -0.24414700 |

**TS6SS-Decar**

|   |             |             |             |
|---|-------------|-------------|-------------|
| C | 0.68066900  | 0.76128800  | 0.79318300  |
| O | 0.09659000  | 1.84556200  | 0.95502200  |
| C | -0.71945500 | -0.68290100 | 0.15134300  |
| C | -2.10476200 | -0.08724900 | 0.17012000  |
| H | -0.43704300 | -1.14760800 | -0.78539500 |
| H | -2.08704500 | 0.83771500  | -0.42129100 |
| C | -3.17878000 | -0.98369300 | -0.43080200 |
| C | -4.17881300 | -0.42975900 | -1.23704900 |
| C | -3.20516300 | -2.35849700 | -0.18282200 |
| C | -5.19084300 | -1.22327700 | -1.77103200 |
| H | -4.16096100 | 0.63858300  | -1.44558300 |
| C | -4.21879700 | -3.15459400 | -0.71172300 |
| H | -2.41824500 | -2.80747500 | 0.41700500  |
| C | -5.21695100 | -2.59022200 | -1.50358600 |
| H | -5.95663100 | -0.77470000 | -2.39634500 |
| H | -4.22758400 | -4.22021100 | -0.50484800 |
| H | -6.00461700 | -3.21283300 | -1.91588000 |
| C | -2.87867900 | -1.05498500 | 3.70596200  |
| C | -2.13587000 | -2.01563800 | 4.37055600  |
| C | -0.97931400 | -2.25917300 | 3.60706700  |
| C | -1.05331400 | -1.44581000 | 2.48522600  |
| N | -2.23178500 | -0.72682300 | 2.55503500  |
| H | -3.82079200 | -0.60110200 | 3.96053700  |
| H | -2.41465800 | -2.48931500 | 5.29979000  |
| H | -0.18417700 | -2.95693200 | 3.82205700  |
| C | -0.21868700 | -1.31742400 | 1.31617200  |
| O | 1.09726400  | -0.03548100 | 1.78142200  |
| C | 0.75922400  | -2.44714000 | 1.10416400  |
| F | 1.56594200  | -2.66860500 | 2.14628700  |
| F | 0.09113800  | -3.59007600 | 0.87187700  |
| F | 1.54113200  | -2.23140000 | 0.03068200  |
| C | -2.46818000 | 0.36789700  | 1.61984100  |

|   |             |             |             |
|---|-------------|-------------|-------------|
| H | -1.77039400 | 1.16810100  | 1.88114500  |
| C | -3.88435900 | 0.91535700  | 1.64158900  |
| O | -4.81417900 | 0.30854900  | 2.13283700  |
| C | -4.10470000 | 2.23329300  | 0.95767300  |
| C | -5.42881700 | 2.59717000  | 0.69070400  |
| C | -3.06034000 | 3.08321900  | 0.57260300  |
| C | -5.71078400 | 3.79248700  | 0.04238300  |
| H | -6.21996400 | 1.92039100  | 0.99569600  |
| C | -3.34902800 | 4.28234200  | -0.07405800 |
| H | -2.02275500 | 2.82429400  | 0.76891700  |
| C | -4.66917400 | 4.63703000  | -0.34119600 |
| H | -6.73951000 | 4.06719800  | -0.16612400 |
| H | -2.53799500 | 4.94062500  | -0.36820200 |
| H | -4.88745200 | 5.57170500  | -0.84802600 |
| C | 3.59573400  | 1.68903200  | -1.22003700 |
| C | 4.88841500  | 2.45498700  | -1.27858000 |
| C | 4.19468300  | 3.36157800  | 0.79665500  |
| C | 3.33310800  | 2.16932400  | 1.21021800  |
| C | 1.74805300  | 0.90388500  | -0.34211600 |
| H | 5.68619300  | 1.79855500  | -1.63457600 |
| H | 4.63025500  | 3.82629700  | 1.68244500  |
| H | 2.43548800  | 2.51926100  | 1.72650000  |
| N | 2.95993500  | 1.14160300  | -2.21464200 |
| N | 1.80966400  | 0.66212100  | -1.65009100 |
| N | 2.88010500  | 1.57906000  | -0.06131300 |
| H | 3.58269300  | 4.10748400  | 0.26861800  |
| H | 4.76393900  | 3.28305400  | -1.98968000 |
| O | 5.27533800  | 2.93272200  | -0.00976100 |
| C | 4.07389800  | 1.13072500  | 2.08644200  |
| H | 4.70273100  | 1.68744500  | 2.78868600  |
| H | 3.30676300  | 0.59954600  | 2.65460100  |
| C | 4.88920200  | 0.12214300  | 1.31019000  |
| C | 6.23493600  | 0.31605900  | 0.99054500  |
| C | 4.25290100  | -1.04444000 | 0.87863400  |
| C | 6.92328500  | -0.63253500 | 0.23674900  |
| H | 6.73909500  | 1.21973300  | 1.31928700  |
| C | 4.93721800  | -1.99190000 | 0.12151900  |
| H | 3.21519100  | -1.19560600 | 1.15633000  |
| C | 6.27546400  | -1.78492900 | -0.20579200 |
| H | 7.96994600  | -0.47249200 | -0.00286600 |
| H | 4.42182300  | -2.89172600 | -0.20182600 |
| H | 6.81519700  | -2.52093600 | -0.79308300 |
| C | 0.81164500  | 0.02486500  | -2.46238800 |
| C | -0.37950300 | 0.72056200  | -2.69819100 |

|   |             |             |             |
|---|-------------|-------------|-------------|
| C | 1.04152600  | -1.27943600 | -2.89810200 |
| C | -1.41282200 | 0.01476600  | -3.30407500 |
| C | -0.03075700 | -1.94113800 | -3.50081900 |
| C | -1.27114400 | -1.32744700 | -3.66981100 |
| H | -2.36494800 | 0.51280000  | -3.46881400 |
| H | 0.10294300  | -2.97249700 | -3.81720600 |
| C | -0.54407200 | 2.16129400  | -2.28911400 |
| H | -0.43801100 | 2.28824200  | -1.20633800 |
| H | 0.21106900  | 2.78824600  | -2.77502000 |
| H | -1.53167800 | 2.52523300  | -2.58123100 |
| C | -2.45452500 | -2.09739700 | -4.18927100 |
| H | -3.09945600 | -1.46665200 | -4.80601200 |
| H | -2.14187400 | -2.96178600 | -4.77909500 |
| H | -3.05566200 | -2.45680000 | -3.34588400 |
| C | 2.37727300  | -1.95359900 | -2.73317500 |
| H | 3.00419700  | -1.76127000 | -3.60951500 |
| H | 2.91792000  | -1.58980700 | -1.85759500 |
| H | 2.24895900  | -3.03329200 | -2.63465200 |

#### TS7RR-D

|   |             |             |             |
|---|-------------|-------------|-------------|
| C | 1.01350400  | -2.22282500 | -1.16422800 |
| O | -0.02766600 | -2.74192900 | -1.55661100 |
| C | 1.12110800  | -0.64147800 | -1.15428500 |
| C | -0.20089500 | 0.00151300  | -0.75440600 |
| H | 1.45925900  | -0.29125300 | -2.13321400 |
| H | -0.95024500 | -0.45540100 | -1.40729100 |
| C | -0.28134000 | 1.51089100  | -0.89825600 |
| C | 0.82943000  | 2.34839300  | -0.76728900 |
| C | -1.52485800 | 2.09098000  | -1.17480000 |
| C | 0.69628100  | 3.72935600  | -0.89550400 |
| H | 1.81602400  | 1.93661600  | -0.57984100 |
| C | -1.66045700 | 3.46908800  | -1.29926300 |
| H | -2.39556900 | 1.45176200  | -1.30254400 |
| C | -0.54780600 | 4.29444100  | -1.15604000 |
| H | 1.57200800  | 4.36216300  | -0.79497400 |
| H | -2.63377900 | 3.89669000  | -1.51638500 |
| H | -0.64872200 | 5.37007600  | -1.25624600 |
| C | 0.54492700  | 0.19305100  | 2.87702400  |
| C | 1.87450200  | 0.29803300  | 3.35590000  |
| C | 2.71271400  | 0.01686700  | 2.30557500  |
| C | 1.89487900  | -0.24023400 | 1.16769200  |
| N | 0.55777200  | -0.11007000 | 1.58322200  |
| H | -0.38214100 | 0.33115000  | 3.41042000  |
| H | 2.14547000  | 0.55646900  | 4.36781900  |

|   |             |             |             |
|---|-------------|-------------|-------------|
| H | 3.79281900  | 0.00510600  | 2.29893800  |
| C | 2.19267200  | -0.52514900 | -0.13705900 |
| O | 2.05564500  | -2.72108100 | -0.65997800 |
| C | 3.64604000  | -0.51649300 | -0.56014900 |
| F | 4.40592800  | -1.27147600 | 0.22917600  |
| F | 4.10251900  | 0.75109100  | -0.46005600 |
| F | 3.81087900  | -0.89802000 | -1.81881000 |
| C | -0.54166400 | -0.48371500 | 0.68525600  |
| H | -0.57697500 | -1.57854500 | 0.66482300  |
| C | -1.89835500 | 0.04181400  | 1.14326500  |
| O | -1.98223200 | 0.94381700  | 1.95208100  |
| C | -3.10560200 | -0.57743600 | 0.52285800  |
| C | -4.34159900 | 0.00925300  | 0.82308100  |
| C | -3.04781000 | -1.69248000 | -0.32476600 |
| C | -5.51006700 | -0.51143200 | 0.28613000  |
| H | -4.35924800 | 0.87301300  | 1.47906400  |
| C | -4.22536300 | -2.20954600 | -0.85769600 |
| H | -2.10480000 | -2.16518800 | -0.59247200 |
| C | -5.45161400 | -1.62358200 | -0.55447800 |
| H | -6.46560000 | -0.05420900 | 0.51970800  |
| H | -4.17994500 | -3.07228500 | -1.51312600 |
| H | -6.36461300 | -2.03236400 | -0.97532500 |

**TS7RS-D**

|   |             |             |             |
|---|-------------|-------------|-------------|
| C | 2.15431700  | -1.59222300 | -1.50580500 |
| O | 1.50014900  | -2.36935300 | -2.17623800 |
| C | 1.47118900  | -1.03479900 | -0.14496200 |
| C | 0.09649000  | -0.45688200 | -0.52537800 |
| H | 1.41569100  | -1.85867200 | 0.56987400  |
| H | 0.10369400  | -0.26525000 | -1.60438000 |
| C | -1.03466200 | -1.41736000 | -0.22308200 |
| C | -1.18407800 | -1.96873200 | 1.05173600  |
| C | -1.99818400 | -1.68639100 | -1.19463300 |
| C | -2.28847200 | -2.75872200 | 1.35592100  |
| H | -0.44103500 | -1.76997100 | 1.82143200  |
| C | -3.10623500 | -2.47264000 | -0.89215000 |
| H | -1.88068400 | -1.26917800 | -2.19114900 |
| C | -3.25656300 | -3.00568300 | 0.38528300  |
| H | -2.39349500 | -3.17965600 | 2.35071200  |
| H | -3.85067200 | -2.67038800 | -1.65626200 |
| H | -4.11992300 | -3.61896000 | 0.62159300  |
| C | 1.03568900  | 3.11058800  | -0.11426200 |
| C | 2.37535800  | 3.54143800  | -0.01179600 |
| C | 3.15560800  | 2.41739800  | 0.15182900  |



|   |             |             |             |
|---|-------------|-------------|-------------|
| C | 2.28926200  | 1.29266400  | 0.12065700  |
| N | 0.98745300  | 1.78076500  | -0.05616900 |
| H | 0.13695100  | 3.69998000  | -0.21900700 |
| H | 2.70131700  | 4.56870600  | -0.06424600 |
| H | 4.23038700  | 2.35967300  | 0.23719600  |
| C | 2.50928700  | -0.06140600 | 0.20433300  |
| O | 3.27581200  | -1.04789900 | -1.67749200 |
| C | 3.78920700  | -0.54073200 | 0.86053900  |
| F | 4.87733500  | 0.02171700  | 0.33988800  |
| F | 3.73796100  | -0.18122300 | 2.15933600  |
| F | 3.91940000  | -1.86116600 | 0.82663100  |
| C | -0.18511300 | 0.91910300  | 0.13331100  |
| H | -0.33358300 | 0.79964700  | 1.21069200  |
| C | -1.41432200 | 1.54333200  | -0.54959100 |
| O | -1.24365200 | 2.17439500  | -1.57359000 |
| C | -2.77756400 | 1.30162600  | -0.00154300 |
| C | -3.85634200 | 1.63258200  | -0.83211800 |
| C | -3.02191700 | 0.75554900  | 1.26245800  |
| C | -5.15855400 | 1.40884700  | -0.41017000 |
| H | -3.64734600 | 2.05368900  | -1.80943900 |
| C | -4.32891200 | 0.53251800  | 1.68263500  |
| H | -2.20784900 | 0.48928300  | 1.92615500  |
| C | -5.39563100 | 0.85478100  | 0.84804800  |
| H | -5.98968800 | 1.65929300  | -1.06054500 |
| H | -4.51223800 | 0.10252400  | 2.66134100  |
| H | -6.41360000 | 0.67369600  | 1.17751000  |

**TS7SR-D**

|   |             |             |             |
|---|-------------|-------------|-------------|
| C | -2.15631900 | -1.59322500 | -1.50352900 |
| O | -1.50410700 | -2.37344800 | -2.17233900 |
| C | -1.47193100 | -1.03463000 | -0.14399600 |
| C | -0.09714100 | -0.45772600 | -0.52571600 |
| H | -1.41606700 | -1.85733700 | 0.57214500  |
| H | -0.10504000 | -0.26599400 | -1.60470500 |
| C | 1.03390000  | -1.41863100 | -0.22408600 |
| C | 1.18276400  | -1.97188100 | 1.04998500  |
| C | 1.99829300  | -1.68574200 | -1.19534900 |
| C | 2.28719800  | -2.76205100 | 1.35364300  |
| H | 0.43933100  | -1.77449400 | 1.81963500  |
| C | 3.10646600  | -2.47198700 | -0.89332700 |
| H | 1.88128500  | -1.26705000 | -2.19131200 |
| C | 3.25601200  | -3.00720100 | 0.38329000  |
| H | 2.39171300  | -3.18445600 | 2.34786400  |
| H | 3.85151300  | -2.66819200 | -1.65724100 |

|   |             |             |             |
|---|-------------|-------------|-------------|
| H | 4.11937400  | -3.62063400 | 0.61918400  |
| C | -1.03368500 | 3.11034700  | -0.11733200 |
| C | -2.37305400 | 3.54223800  | -0.01418100 |
| C | -3.15386000 | 2.41899300  | 0.15163000  |
| C | -2.28823100 | 1.29356700  | 0.12113600  |
| N | -0.98625500 | 1.78063900  | -0.05754200 |
| H | -0.13467300 | 3.69906900  | -0.22357800 |
| H | -2.69836600 | 4.56965200  | -0.06776000 |
| H | -4.22860500 | 2.36207500  | 0.23800600  |
| C | -2.50920000 | -0.06017300 | 0.20516900  |
| O | -3.27664600 | -1.04690100 | -1.67649600 |
| C | -3.78973300 | -0.53837400 | 0.86104300  |
| F | -4.87730200 | 0.02448100  | 0.33966100  |
| F | -3.73889400 | -0.17813900 | 2.15968000  |
| F | -3.92070700 | -1.85874400 | 0.82783700  |
| C | 0.18565300  | 0.91819200  | 0.13263700  |
| H | 0.33351500  | 0.79888100  | 1.21011000  |
| C | 1.41537200  | 1.54137900  | -0.55027900 |
| O | 1.24506900  | 2.17072900  | -1.57542100 |
| C | 2.77838400  | 1.30093500  | -0.00119500 |
| C | 3.85750200  | 1.63350700  | -0.83070600 |
| C | 3.02224800  | 0.75438000  | 1.26267700  |
| C | 5.15958900  | 1.41095900  | -0.40778900 |
| H | 3.64886100  | 2.05491900  | -1.80796400 |
| C | 4.32913800  | 0.53243300  | 1.68377600  |
| H | 2.20793400  | 0.48666500  | 1.92546200  |
| C | 5.39620300  | 0.85636700  | 0.85029800  |
| H | 5.99100500  | 1.66267400  | -1.05731400 |
| H | 4.51211800  | 0.10207900  | 2.66238800  |
| H | 6.41408900  | 0.67620500  | 1.18052600  |

**TS7SS-D**

|   |             |             |             |
|---|-------------|-------------|-------------|
| C | -1.01259500 | -2.22315100 | -1.16334900 |
| O | 0.02835200  | -2.74394800 | -1.55360000 |
| C | -1.12054700 | -0.64154000 | -1.15440700 |
| C | 0.20114400  | 0.00203400  | -0.75469800 |
| H | -1.45900300 | -0.29169200 | -2.13337800 |
| H | 0.95067900  | -0.45483300 | -1.40741600 |
| C | 0.28094500  | 1.51137500  | -0.89892100 |
| C | 1.52396100  | 2.09197300  | -1.17655100 |
| C | -0.83013100 | 2.34834500  | -0.76708100 |
| C | 1.65882200  | 3.47014300  | -1.30119900 |
| H | 2.39485000  | 1.45310800  | -1.30487300 |
| C | -0.69771300 | 3.72936000  | -0.89544300 |

|   |             |             |             |
|---|-------------|-------------|-------------|
| H | -1.81641600 | 1.93605300  | -0.57905500 |
| C | 0.54591400  | 4.29498500  | -1.15705100 |
| H | 2.63175500  | 3.89818700  | -1.51918500 |
| H | -1.57363800 | 4.36178300  | -0.79422100 |
| H | 0.64625900  | 5.37066200  | -1.25738400 |
| C | -0.54466100 | 0.19606800  | 2.87630000  |
| C | -1.87417700 | 0.30079000  | 3.35504700  |
| C | -2.71230700 | 0.01749700  | 2.30510300  |
| C | -1.89443500 | -0.24060500 | 1.16763700  |
| N | -0.55743500 | -0.10887600 | 1.58282000  |
| H | 0.38237000  | 0.33562200  | 3.40935000  |
| H | -2.14530200 | 0.56046800  | 4.36660500  |
| H | -3.79240400 | 0.00497200  | 2.29851900  |
| C | -2.19247100 | -0.52694900 | -0.13696200 |
| O | -2.05591900 | -2.71996600 | -0.65952600 |
| C | -3.64593600 | -0.51858600 | -0.55959100 |
| F | -4.40555100 | -1.27362000 | 0.22992100  |
| F | -4.10246500 | 0.74901900  | -0.45915800 |
| F | -3.81125200 | -0.89976400 | -1.81828800 |
| C | 0.54202200  | -0.48272800 | 0.68505900  |
| H | 0.57754000  | -1.57756100 | 0.66497500  |
| C | 1.89878500  | 0.04292700  | 1.14263600  |
| O | 1.98293500  | 0.94546600  | 1.95081600  |
| C | 3.10591100  | -0.57703100 | 0.52262800  |
| C | 4.34210600  | 0.00917700  | 0.82298300  |
| C | 3.04786100  | -1.69237400 | -0.32458900 |
| C | 5.51049400  | -0.51229500 | 0.28661700  |
| H | 4.35998000  | 0.87317500  | 1.47864600  |
| C | 4.22532800  | -2.21022900 | -0.85694300 |
| H | 2.10470700  | -2.16466500 | -0.59251300 |
| C | 5.45177300  | -1.62476100 | -0.55355300 |
| H | 6.46617600  | -0.05545000 | 0.52032800  |
| H | 4.17969300  | -3.07320400 | -1.51204900 |
| H | 6.36470800  | -2.03416800 | -0.97393300 |
